# Supplementary material
Source: PubMed Central journal article supplement (PMC6399024)
Supplement: NIHMS1008170-supplement-Supporting_Information.pdf [file NIHMS1008170-supplement-Supporting_Information.pdf]

Division of Chemistry and Chemical Engineering, California Institute of Technology,  
Pasadena, California 91125, United States

## Supporting Information

### Table of Contents

|      |                                                          |      |
|------|----------------------------------------------------------|------|
| I.   | General Information                                      | S-1  |
| II.  | Preparation of Electrophiles                             | S-3  |
| III. | Cross-Couplings                                          | S-19 |
| IV.  | Mechanistic Experiments                                  | S-33 |
| V.   | Determination of Absolute Stereochemistry                | S-34 |
| VI.  | <sup>1</sup> H and <sup>13</sup> C NMR Data; ee Analysis | S-42 |

### I. General Information

All manipulations of air-sensitive materials were carried out in oven-dried glassware under an atmosphere of argon or nitrogen using standard Schlenk or glovebox techniques. Glovebox manipulations were carried out under an atmosphere of nitrogen. THF and CH<sub>2</sub>Cl<sub>2</sub> were purified and dried using a solvent purification system that contained activated alumina under argon. Unless otherwise noted, all commercially available reagents were used as received, including NiBr<sub>2</sub>·diglyme (Sigma-Aldrich) and DMA (anhydrous, 99.8%, Sigma-Aldrich). Ligand L\* (one step)<sup>1</sup> and 3-phenyl-1-(trimethylsilyl)propan-1-one<sup>2</sup> were prepared according to literature procedures. Aldehydes that are not commercially available were prepared according to a literature procedure.<sup>3</sup>

<sup>1</sup>H and <sup>13</sup>C NMR data were collected on a Bruker 400 MHz, a Varian 300 MHz, or a Varian 500 MHz spectrometer at ambient temperature and are reported in ppm relative to residual CHCl<sub>3</sub> (δ 7.26, <sup>1</sup>H NMR; δ 77.36, <sup>13</sup>C NMR); s = singlet, d = doublet, t = triplet, q = quartet, p =

- 
- (1) Espelt, L. R.; McPherson, I. S.; Wiensch, E. M.; Yoon, T. P. *J. Am. Chem. Soc.* **2015**, *137*, 2452–2455.
  - (2) Decostanzi, M.; Van Der Lee, A.; Campagne, J.-M.; Leclerc, E. *Adv. Synth. Catal.* **2015**, *357*, 3091–3097.
  - (3) Hoover, J. M.; Stahl, S. S. *Org. Synth.* **2013**, *90*, 240–250.

pentet, sept = septuplet, m = multiplet, br = broad. IR spectra were obtained on a PerkinElmer Paragon 1000 spectrometer using thin films deposited on NaCl plates and are reported in frequency of absorption ( $\text{cm}^{-1}$ ). HR-MS were acquired by the Caltech Mass Spectrometry Facility using a JEOL JMS-600H MS in fast atom bombardment (FAB+) or electron ionization (EI+) mode, or using a Waters LCT Premier XE TOF MS in electrospray ionization (ESI+) mode. LC-MS were obtained on an Agilent 5975C GC/MSD System in electron ionization (EI+) mode. Optical rotations were measured on a Jasco P-2000 polarimeter operating on the sodium D-line (589 nm) using a 100 mm pathlength cell. Analytical SFC was performed on a Mettler SFC supercritical  $\text{CO}_2$  analytical chromatography system utilizing CHIRALPAK (AD-H, IC-3) or CHIRALCEL (OD-H, OJ) columns (4.6 mm  $\times$  25 cm) obtained from Daicel Chemical Industries, Ltd. Preparative SFC was performed on a JASCO SFC supercritical  $\text{CO}_2$  preparative chromatography system utilizing a CHIRALPAK AD-H column (10 mm  $\times$  250 cm) obtained from Daicel Chemical Industries, Ltd. GC analyses were obtained on an Agilent 6890N GC. Flash column chromatography was performed using silica gel (SiliaFlash<sup>®</sup> P60, particle size 40-63  $\mu\text{m}$ , Silicycle). Thin-layer chromatography (TLC) and preparatory TLC were performed using Merck silica gel 60 F<sub>254</sub> pre-coated plates (0.25 mm) and visualized by UV fluorescence quenching and  $\text{KMnO}_4$  staining. X-ray crystallographic analysis was carried out by the Caltech X-Ray Crystallography Facility using a Bruker APEX-II CCD diffractometer. ESI-MS experiments were conducted by direct injection using a Thermo Scientific LTQ linear ion trap mass spectrometer. X-band EPR measurements were collected on a Bruker EMX spectrometer; EPR simulation was conducted using EasySpin.<sup>4</sup>

---

(4) Stoll, S.; Schweiger, A. *J. Magn. Reson.* **2006**, *178*, 42-55.

## II. Preparation of Electrophiles

The yields have not been optimized.

**General Procedure A: Preparation of  $\alpha$ -hydroxysilanes (for substrates that contain at least one aryl substituent on silicon).** A flame-dried round-bottom flask was charged with a glass-covered magnetic stir bar, pellets of Li metal (2.3 equiv), and  $R_3SiCl$  (if a solid), and then it was sealed with a rubber septum cap. Next, the flask was evacuated and backfilled with an argon-filled balloon (three cycles). THF (to generate a solution with  $[R_3SiCl] = 1.0$  M) was then added, followed by  $R_3SiCl$  (if a liquid) as a steady stream. The resulting mixture was stirred at room temperature for 16 h (note: after ~20 min of stirring, the reaction mixture had turned dark green or brown).

Next, a solution of the aldehyde (0.75 equiv) in THF ( $[aldehyde] = 0.38$  M) was prepared in a flame-dried round-bottom flask under an atmosphere of nitrogen. The resulting solution was cooled to  $-78$  °C, and the solution of the lithiated silane was then added dropwise over 5 min. Next, the reaction mixture was warmed to room temperature and stirred for 16 h. The mixture was quenched through the addition of a saturated solution of  $NH_4Cl$  (1.0 mL/mmol of  $R_3SiCl$ ), and the resulting mixture was extracted three times with EtOAc. The combined organic layers were dried over  $MgSO_4$ , filtered, and concentrated. The resulting  $\alpha$ -hydroxysilane was purified via flash chromatography (the  $\alpha$ -hydroxysilane can be visualized using  $KMnO_4$ ).

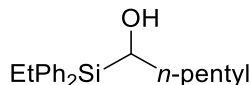

**1-(Ethyldiphenylsilyl)hexan-1-ol.** The title compound was synthesized according to **General Procedure A** from *n*-hexanal (0.83 mL, 6.8 mmol) and chloro(ethyl)diphenylsilane<sup>5</sup> (2.22 g, 9.0 mmol). The product was purified by flash chromatography (2 → 5% EtOAc in hexanes), which provided 1.60 g (76% yield) of a colorless oil.

<sup>1</sup>H NMR (400 MHz,  $CDCl_3$ )  $\delta$  7.66–7.53 (m, 4H), 7.47–7.31 (m, 6H), 3.98 (dd,  $J = 9.4, 3.2$  Hz, 1H), 1.66–1.52 (m, 3H), 1.38–1.11 (m, 8H), 1.06 (t,  $J = 7.8$  Hz, 3H), 0.87 (t,  $J = 6.9$  Hz, 3H);

<sup>13</sup>C NMR (101 MHz,  $CDCl_3$ )  $\delta$  135.8, 135.7, 134.1, 133.9, 129.8, 129.7, 128.17, 128.16, 64.2, 33.8, 31.8, 26.9, 22.9, 14.3, 7.8, 3.1;

FT-IR (thin film) 3368, 3070, 2962, 1428, 1261, 1094, 1030, 863  $cm^{-1}$ ;

HR-MS (FAB+)  $m/z$   $[M+H]^+ - H_2$  calcd for  $C_{20}H_{27}OSi$ : 311.1831, found: 311.1835.

---

(5) Kwak, Y.-W.; Lee, K.-K. *J. Organomet. Chem.* **1997**, *542*, 219–225.

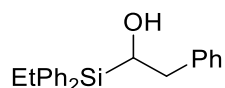

**1-(Ethyldiphenylsilyl)-2-phenylethan-1-ol.** The title compound was synthesized according to **General Procedure A** from 2-phenylacetaldehyde (0.80 mL, 6.8 mmol) and chloro(ethyl)diphenylsilane (2.22 g, 9.0 mmol). The product was purified by flash chromatography (0 → 6% EtOAc in hexanes), which provided 0.41 g (18% yield) of a colorless oil.

$^1\text{H}$  NMR (400 MHz,  $\text{CDCl}_3$ )  $\delta$  7.69 – 7.63 (m, 4H), 7.44 – 7.37 (m, 6H), 7.33 – 7.27 (m, 2H), 7.25 – 7.18 (m, 3H), 4.16 (dd,  $J = 12.0, 2.7$  Hz, 1H), 2.93 (dd,  $J = 14.0, 2.7$  Hz, 1H), 2.76 (dd,  $J = 14.0, 11.9$  Hz, 1H), 1.53 (s, 1H), 1.27 – 1.17 (m, 2H), 1.08 (t,  $J = 7.6$  Hz, 3H);

$^{13}\text{C}$  NMR (101 MHz,  $\text{CDCl}_3$ )  $\delta$  139.9, 135.94, 135.88, 134.6, 134.01, 133.97, 129.93, 129.91, 129.4, 128.9, 128.31, 128.28, 128.25, 126.8, 65.4, 40.3, 7.9, 3.2;

FT-IR (thin film) 3546, 3068, 2913, 1454, 1428, 1260, 1111, 1012, 856  $\text{cm}^{-1}$ ;

HR-MS (FAB+)  $m/z$   $[\text{M}+\text{H}]^+$  calcd for  $\text{C}_{22}\text{H}_{25}\text{OSi}$ : 333.1675, found: 333.1646.

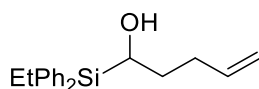

**1-(Ethyldiphenylsilyl)pent-4-en-1-ol.** The title compound was synthesized according to **General Procedure A** from pent-4-enal (0.50 mL, 5.06 mmol) and chloro(ethyl)diphenylsilane (1.68 g, 6.8 mmol). The product was purified by flash chromatography (2 → 4% EtOAc in hexanes), which provided 0.42 g (27% yield) of a colorless oil.

$^1\text{H}$  NMR (400 MHz,  $\text{CDCl}_3$ )  $\delta$  7.65 – 7.54 (m, 4H), 7.47 – 7.33 (m, 6H), 5.95 – 5.73 (m, 1H), 5.04 (dq,  $J = 17.1, 1.7$  Hz, 1H), 4.98 (ddt,  $J = 10.1, 2.1, 1.2$  Hz, 1H), 4.07 – 3.94 (m, 1H), 2.44 – 2.25 (m, 1H), 2.15 (dtdd,  $J = 14.5, 7.4, 2.6, 1.3$  Hz, 1H), 1.77 – 1.66 (m, 2H), 1.30 – 1.10 (m, 3H), 1.05 (t,  $J = 7.6$  Hz, 3H);

$^{13}\text{C}$  NMR (101 MHz,  $\text{CDCl}_3$ )  $\delta$  138.9, 135.9, 135.8, 135.0, 134.0, 133.9, 129.92, 129.89, 128.3, 115.5, 63.7, 33.1, 31.7, 7.9, 3.1;

FT-IR (thin film) 3436, 3069, 2958, 1428, 1261, 1111, 1011, 912  $\text{cm}^{-1}$ ;

HR-MS (FAB+)  $m/z$   $[\text{M}+\text{H}]^+ - \text{H}_2$  calcd for  $\text{C}_{19}\text{H}_{23}\text{OSi}$ : 295.1518, found: 295.1515.

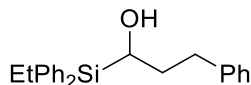

**1-(Ethyldiphenylsilyl)-3-phenylpropan-1-ol.** The title compound was synthesized according to **General Procedure A** from 3-phenylpropanal (0.99 mL, 7.5 mmol) and chloro(ethyl)diphenylsilane (2.47 g, 10.0 mmol). The product was purified by flash chromatography (5 → 10% EtOAc in hexanes), which provided 1.21 g (46% yield) of a colorless oil.

$^1\text{H}$  NMR (400 MHz,  $\text{CDCl}_3$ )  $\delta$  7.62 – 7.52 (m, 4H), 7.46 – 7.33 (m, 6H), 7.31 – 7.25 (m, 2H), 7.22 – 7.13 (m, 3H), 3.99 (ddd,  $J$  = 9.8, 5.3, 3.9 Hz, 1H), 2.94 (ddd,  $J$  = 14.1, 8.6, 5.8 Hz, 1H), 2.66 (ddd,  $J$  = 13.6, 8.7, 7.3 Hz, 1H), 2.00 – 1.84 (m, 2H), 1.19 – 1.10 (m, 3H), 1.03 (t,  $J$  = 7.6 Hz, 3H);  
 $^{13}\text{C}$  NMR (101 MHz,  $\text{CDCl}_3$ )  $\delta$  142.3, 135.85, 135.79, 133.84, 133.76, 130.0, 129.9, 128.9, 128.7, 128.32, 128.31, 126.1, 63.6, 35.8, 33.6, 7.8, 3.1;

FT-IR (thin film) 3568, 3447, 3067, 2954, 1602, 1496, 1454, 1428, 1379, 1232, 1190, 1111, 1027, 955, 914  $\text{cm}^{-1}$ ;

HR-MS (FAB+)  $m/z$   $[\text{M}+\text{H}]^+-\text{H}_2$  calcd for  $\text{C}_{23}\text{H}_{25}\text{OSi}$ : 345.1669, found: 345.1668.

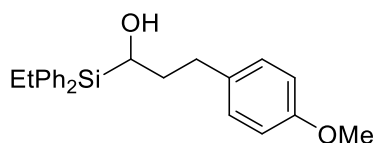

**1-(Ethyldiphenylsilyl)-3-(4-methoxyphenyl)propan-1-ol.** The title compound was synthesized according to **General Procedure A** from 3-(4-methoxyphenyl)propanal (1.11 g, 6.8 mmol) and chloro(ethyl)diphenylsilane (2.22 g, 9.0 mmol). The product was purified by flash chromatography (5  $\rightarrow$  15% EtOAc in hexanes), which provided 2.20 g (87% yield) of a colorless oil.

$^1\text{H}$  NMR (400 MHz,  $\text{CDCl}_3$ )  $\delta$  7.61–7.51 (m, 4H), 7.45–7.33 (m, 6H), 7.11–7.04 (m, 2H), 6.85–6.79 (m, 2H), 3.97 (dt,  $J$  = 9.8, 4.9 Hz, 1H), 3.79 (s, 3H), 2.87 (ddd,  $J$  = 13.9, 8.2, 6.1 Hz, 1H), 2.61 (dt,  $J$  = 13.8, 8.2 Hz, 1H), 1.94–1.83 (m, 2H), 1.20–1.11 (m, 2H), 1.02 (t,  $J$  = 7.7 Hz, 3H);

$^{13}\text{C}$  NMR (101 MHz,  $\text{CDCl}_3$ )  $\delta$  158.0, 135.8, 135.7, 134.2, 133.8, 133.7, 129.83, 129.81, 129.7, 128.22, 128.21, 114.0, 63.4, 55.5, 35.8, 32.5, 7.8, 3.0;

FT-IR (thin film) 3448, 3068, 2954, 1611, 1517, 1458, 1427, 1300, 1246, 1177, 1110, 1035, 808  $\text{cm}^{-1}$ ;

HR-MS (FAB+)  $m/z$   $[\text{M}+\text{H}]^+-\text{H}_2$  calcd for  $\text{C}_{24}\text{H}_{27}\text{O}_2\text{Si}$ : 375.1780, found: 375.17890.

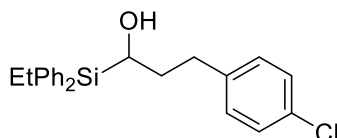

**3-(4-Chlorophenyl)-1-(ethyldiphenylsilyl)propan-1-ol.** The title compound was synthesized according to **General Procedure A** from 3-(4-chlorophenyl)propanal (1.14 g, 6.8 mmol) and chloro(ethyl)diphenylsilane (2.22 g, 9.0 mmol). The product was purified by flash chromatography (5  $\rightarrow$  7% EtOAc in hexanes), which provided 1.13 g (44% yield) of a colorless oil.

$^1\text{H}$  NMR (400 MHz,  $\text{CDCl}_3$ )  $\delta$  7.60–7.51 (m, 4H), 7.43–7.33 (m, 6H), 7.23 (d,  $J$  = 8.4 Hz, 2H), 7.08 (d,  $J$  = 8.4 Hz, 2H), 3.94 (q,  $J$  = 6.3 Hz, 1H), 2.90 (dt,  $J$  = 14.0, 7.1 Hz, 1H), 2.64 (dt,  $J$  = 14.0, 8.4 Hz, 1H), 1.93–1.82 (m, 2H), 1.19–1.12 (m, 3H), 1.02 (t,  $J$  = 7.6 Hz, 3H);

$^{13}\text{C}$  NMR (101 MHz,  $\text{CDCl}_3$ )  $\delta$  140.6, 135.71, 135.66, 133.6, 133.5, 131.7, 130.2, 129.93, 129.91, 128.7, 128.28, 128.27, 63.2, 35.5, 32.7, 7.7, 3.0;

FT-IR (thin film) 3434, 3068, 2956, 1492, 1428, 1260, 1111, 1092, 1015, 808  $\text{cm}^{-1}$ ;

HR-MS (FAB+)  $m/z$   $[\text{M}+\text{H}]^+-\text{H}_2$  calcd for  $\text{C}_{23}\text{H}_{24}\text{ClOSi}$ : 379.1285, found: 379.1288.

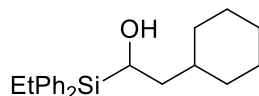

**2-Cyclohexyl-1-(ethyldiphenylsilyl)ethan-1-ol.** The title compound was synthesized according to **General Procedure A** from 2-cyclohexylacetaldehyde (0.82 g, 6.5 mmol) and chloro(ethyl)diphenylsilane (2.14 g, 8.66 mmol). The product was purified by flash chromatography (0  $\rightarrow$  5% EtOAc in hexanes), which provided 2.24 g (>99% yield, nominally pure) of a pale-yellow oil.

$^1\text{H}$  NMR (300 MHz,  $\text{CDCl}_3$ )  $\delta$  7.67–7.51 (m, 4H), 7.46–7.31 (m, 6H), 4.15 (ddd,  $J$  = 11.4, 5.6, 2.2 Hz, 1H), 1.90 (d,  $J$  = 12.5 Hz, 1H), 1.78–1.45 (m, 7H), 1.42–1.34 (m, 1H), 1.23–1.11 (m, 4H), 1.08–0.99 (m, 5H), 0.83–0.68 (m, 1H);

$^{13}\text{C}$  NMR (101 MHz,  $\text{CDCl}_3$ )  $\delta$  135.8, 135.7, 134.0, 133.9, 129.74, 129.71, 128.2, 128.1, 60.8, 41.4, 34.9, 34.1, 32.1, 26.9, 26.7, 26.4, 7.7, 3.0;

FT-IR (thin film) 3445, 3069, 2913, 1427, 1236, 1189, 1110, 1013, 872  $\text{cm}^{-1}$ ;

HR-MS (FAB+)  $m/z$   $[\text{M}+\text{H}]^+$  calcd for  $\text{C}_{22}\text{H}_{31}\text{OSi}$ : 339.2144, found: 339.2153.

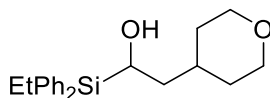

**1-(Ethyldiphenylsilyl)-2-(tetrahydro-2H-pyran-4-yl)ethan-1-ol.** The title compound was synthesized according to **General Procedure A** from 2-(tetrahydro-2H-pyran-4-yl)acetaldehyde (0.87 g, 6.75 mmol) and chloro(ethyl)diphenylsilane (2.22 g, 9.0 mmol). The product was purified by flash chromatography (20  $\rightarrow$  40% EtOAc in hexanes), which provided 1.55 g (67% yield) of a colorless oil.

$^1\text{H}$  NMR (400 MHz,  $\text{CDCl}_3$ )  $\delta$  7.64–7.54 (m, 4H), 7.44–7.34 (m, 6H), 4.14 (ddd,  $J$  = 12.0, 5.8, 2.4 Hz, 1H), 3.96 (ddd,  $J$  = 11.3, 4.3, 1.6 Hz, 1H), 3.91 (ddd,  $J$  = 11.3, 4.5, 1.6 Hz, 2H), 3.36 (tdd,  $J$  = 11.7, 7.8, 2.2 Hz, 2H), 1.89–1.73 (m, 2H), 1.63–1.56 (m, 1H), 1.54–1.46 (m, 1H), 1.41 (ddd,  $J$  = 14.4, 9.7, 2.3 Hz, 1H), 1.36–1.28 (m, 1H), 1.20–1.13 (m, 2H), 1.05 (t,  $J$  = 7.7 Hz, 3H), 1.00 (d,  $J$  = 6.0 Hz, 1H);

$^{13}\text{C}$  NMR (101 MHz,  $\text{CDCl}_3$ )  $\delta$  135.63, 135.57, 133.6, 133.4, 129.83, 129.80, 128.184, 128.176, 68.24, 68.18, 60.2, 40.7, 34.3, 32.0, 31.5, 7.6, 2.8;

FT-IR (thin film) 3436, 3068, 2913, 1724, 1428, 1386, 1300, 1261, 1190, 1110, 1013, 872  $\text{cm}^{-1}$ ;

HR-MS (FAB+)  $m/z$   $[\text{M}+\text{H}]^+-\text{H}_2$  calcd for  $\text{C}_{21}\text{H}_{27}\text{O}_2\text{Si}$ : 339.1780, found: 339.1774.

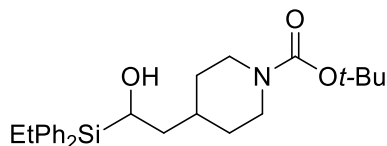

**Tert-butyl 4-(2-(ethyldiphenylsilyl)-2-hydroxyethyl)piperidine-1-carboxylate.** The title compound was synthesized according to **General Procedure A** from *tert*-butyl 4-(2-oxoethyl)piperidine-1-carboxylate (1.53 g, 6.75 mmol) and chloro(ethyl)diphenylsilane (2.22 g, 9.0 mmol). The product was purified by flash chromatography (20 → 30% EtOAc in hexanes), which provided 2.40 g (81% yield) of a colorless oil.

$^1\text{H}$  NMR (400 MHz,  $\text{CDCl}_3$ )  $\delta$  7.62–7.53 (m, 4H), 7.46–7.32 (m, 6H), 4.12 (ddd,  $J = 12.0, 5.8, 2.2$  Hz, 1H), 4.08 (br s, 2H), 2.66 (t,  $J = 10.6$  Hz, 2H), 1.84 (d,  $J = 12.5$  Hz, 1H), 1.79–1.67 (m, 1H), 1.64–1.50 (m, 2H), 1.44 (s, 9H), 1.39 (ddd,  $J = 14.4, 9.8, 2.2$  Hz, 1H), 1.21–1.08 (m, 3H), 1.04 (t,  $J = 7.6$  Hz, 3H), 1.07–1.01 (m, 1H), 1.01–0.95 (m, 1H);

$^{13}\text{C}$  NMR (101 MHz,  $\text{CDCl}_3$ )  $\delta$  155.1, 135.7, 135.6, 133.6, 133.5, 129.92, 129.89, 128.3, 79.4, 60.6, 44.2 (br), 40.4, 33.5, 32.6, 31.1, 28.7, 7.7, 2.9;

FT-IR (thin film) 3447, 3069, 2916, 1694, 1668, 1428, 1366, 1279, 1246, 1167, 1111, 1011, 974, 869  $\text{cm}^{-1}$ ;

HR-MS (FAB+)  $m/z$   $[\text{M}+\text{H}]^+$  calcd for  $\text{C}_{26}\text{H}_{38}\text{NO}_3\text{Si}$ : 440.2621, found: 440.2632.

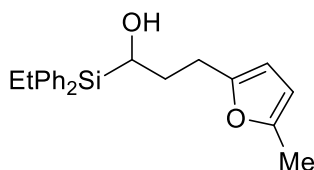

**1-(Ethyldiphenylsilyl)-3-(5-methylfuran-2-yl)propan-1-ol.** The title compound was synthesized according to **General Procedure A** from 3-(5-methylfuran-2-yl)propanal (0.95 mL, 7.1 mmol) and chloro(ethyl)diphenylsilane (2.35 g, 9.5 mmol). The product was purified by flash chromatography (5 → 10% EtOAc in hexanes), which provided 1.94 g (77% yield) of a colorless oil.

$^1\text{H}$  NMR (400 MHz,  $\text{CDCl}_3$ )  $\delta$  7.66–7.51 (m, 4H), 7.48–7.30 (m, 6H), 5.88–5.80 (m, 2H), 3.98 (dd,  $J = 11.5, 2.6$  Hz, 1H), 2.85 (ddd,  $J = 13.6, 8.2, 5.2$  Hz, 1H), 2.69 (dt,  $J = 15.5, 7.8$  Hz, 1H), 2.27 (s, 3H), 2.03–1.92 (m, 1H), 1.91–1.78 (m, 1H), 1.44 (br s, 1H), 1.23–1.13 (m, 2H), 1.04 (t,  $J = 7.8$  Hz, 3H);

$^{13}\text{C}$  NMR (101 MHz,  $\text{CDCl}_3$ )  $\delta$  154.0, 150.6, 135.73, 135.67, 133.73, 133.67, 129.82, 129.79, 128.19, 128.18, 106.1, 106.0, 63.3, 32.4, 25.7, 13.8, 7.7, 3.0;

FT-IR (thin film) 3293, 3070, 2959, 1590, 1458, 1428, 1261, 1118, 1012, 829  $\text{cm}^{-1}$ ;

HR-MS (FAB+)  $m/z$   $[\text{M}+\text{H}]^+$  calcd for  $\text{C}_{22}\text{H}_{27}\text{O}_2\text{Si}$ : 351.1780, found: 351.1782.

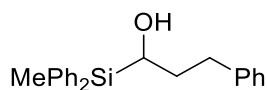

**1-(Methyldiphenylsilyl)-3-phenylpropan-1-ol.** The title compound was synthesized according to **General Procedure A** from 3-phenylpropanal (0.94 mL, 7.1 mmol) and chloro(methyl)diphenylsilane (2.00 mL, 9.5 mmol). The product was purified by flash chromatography (5 → 10% EtOAc in hexanes), which provided 2.09 g (88% yield) of a colorless oil.

$^1\text{H}$  NMR (400 MHz,  $\text{CDCl}_3$ )  $\delta$  7.57 – 7.49 (m, 4H), 7.46 – 7.32 (m, 6H), 7.31 – 7.25 (m, 2H), 7.22 – 7.14 (m, 3H), 3.93 (dd,  $J = 8.9, 5.3$  Hz, 1H), 2.95 (ddd,  $J = 14.1, 8.5, 6.4$  Hz, 1H), 2.66 (dt,  $J = 13.6, 8.1$  Hz, 1H), 2.02 – 1.85 (m, 2H), 1.19 (s, 1H), 0.61 (s, 3H);

$^{13}\text{C}$  NMR (101 MHz,  $\text{CDCl}_3$ )  $\delta$  142.3, 135.4, 135.3, 135.1, 134.8, 130.00, 129.96, 128.9, 128.7, 128.37, 128.36, 126.1, 64.2, 35.5, 33.6, –6.4;

FT-IR (thin film) 3566, 3443, 3068, 2924, 1602, 1496, 1454, 1428, 1253, 1112, 1028, 914  $\text{cm}^{-1}$ ;  
HR-MS (FAB+)  $m/z$   $[\text{M}+\text{H}]^+$  calcd for  $\text{C}_{22}\text{H}_{25}\text{OSi}$ : 333.1675, found: 333.1680.

**General Procedure B: Preparation of  $\alpha$ -(dithiane)silanes (for substrates that lack an aryl substituent on silicon).** The method of Christmann was used.<sup>6</sup>

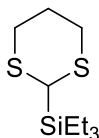

**(1,3-Dithian-2-yl)triethylsilane.** The title compound was synthesized according to **General Procedure B** from chlorotriethylsilane (16.8 mL, 100 mmol). The product was purified by high-vacuum distillation, which provided 16.9 g (87% yield) of a colorless oil.

$^1\text{H}$  NMR (400 MHz,  $\text{CDCl}_3$ )  $\delta$  3.82 (s, 1H), 2.94 – 2.83 (m, 2H), 2.78 – 2.66 (m, 2H), 2.18 – 1.95 (m, 2H), 1.01 (t,  $J = 7.9$  Hz, 9H), 0.70 (q,  $J = 7.9$ , 6H);

$^{13}\text{C}$  NMR (101 MHz,  $\text{CDCl}_3$ )  $\delta$  32.5, 31.8, 26.8, 7.8, 2.5;

FT-IR (thin film) 2951, 2875, 1458, 1420, 1260, 1240, 1163, 1084, 1019, 778  $\text{cm}^{-1}$ ;

HR-MS (FAB+)  $m/z$   $[\text{M}+\text{H}]^+ - \text{H}_2$  calcd for  $\text{C}_{10}\text{H}_{21}\text{S}_2\text{Si}$ : 233.0854, found: 233.0846.

(6) Winter, P.; Hiller, W.; Christmann, M. *Angew. Chem. Int. Ed.* **2012**, *51*, 3396–3400.



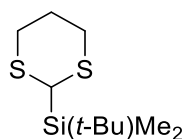

**Tert-butyl(1,3-dithian-2-yl)dimethylsilane.**<sup>7</sup> The title compound was synthesized according to **General Procedure B** from *tert*-butyl(chloro)dimethylsilane (15.1 g, 100 mmol). The product was purified by high-vacuum distillation, which provided 16.2 g (83 yield) of a pale-purple oil.

<sup>1</sup>H NMR (300 MHz, CDCl<sub>3</sub>) δ 3.80 (s, 1H), 2.98 – 2.76 (m, 2H), 2.69 (ddd, J = 14.0, 4.1, 3.1 Hz, 2H), 2.17 – 1.90 (m, 2H), 0.96 (d, J = 0.6 Hz, 9H), 0.10 (d, J = 0.5 Hz, 6H).

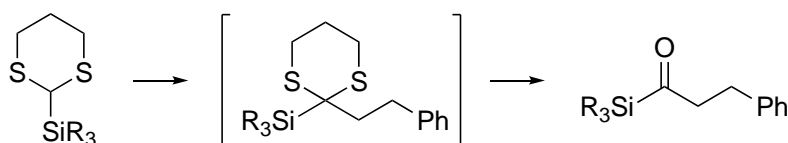

**General Procedure C: Preparation of acylsilanes (for substrates that lack an aryl substituent on silicon).** The alkylation of  $\alpha$ -dithiane silanes was performed according to a literature procedure.<sup>8</sup> In a flame-dried round-bottom flask, *n*-BuLi (1.05 equiv) was added dropwise to a stirring solution of the  $\alpha$ -dithiane silane (1.00 equiv) in THF (0.4 M with respect to the  $\alpha$ -dithiane silane) at room temperature under an atmosphere of nitrogen. The solution was stirred for 10 min at room temperature, and then it was cooled to  $-40$  °C. Next, (2-bromoethyl)benzene (1.10 equiv) was added dropwise over 1–2 min. The reaction mixture was then warmed to room temperature and stirred for 2 h. Next, the reaction was quenched through the addition of a saturated aqueous solution of NH<sub>4</sub>Cl. The resulting mixture was extracted with Et<sub>2</sub>O three times, and the organic phases were collected, dried over MgSO<sub>4</sub>, filtered, and concentrated. This material was used in the next step without further purification.

The deprotection of the  $\alpha$ -alkyl- $\alpha$ -dithiane silanes was performed according to a literature procedure.<sup>2</sup> In a round-bottom flask, the  $\alpha$ -alkyl- $\alpha$ -dithiane silane was dissolved in a 4:1 mixture of THF/H<sub>2</sub>O (0.9 M with respect to the  $\alpha$ -dithiane silane). The solution was cooled to 0 °C, and then CaCO<sub>3</sub> (15.6 equiv) was added, followed by I<sub>2</sub> (12.0 equiv; added in portions). The reaction was warmed to room temperature and stirred for 16 h. The reaction mixture was diluted with Et<sub>2</sub>O (15 mL/mmol of  $\alpha$ -dithiane silane), and the reaction was quenched by the addition of a saturated solution of Na<sub>2</sub>S<sub>2</sub>O<sub>3</sub>. The biphasic mixture was filtered through Celite and transferred to a separatory funnel (note: if the color of iodine remains, the organic layer was washed with an additional quantity of the saturated solution of Na<sub>2</sub>S<sub>2</sub>O<sub>3</sub>). The organic layer was separated, dried over MgSO<sub>4</sub>, filtered, and concentrated. The acyl silane can be used in **General Procedure D** without further purification.

(7) Scheller, M. E.; Frei, B. *Helv. Chim. Acta.* **1984**, *67*, 1734–1747.

(8) Smith, A. B., III; Xian, M.; Kim, W.-S.; Kim, D.-S. *J. Am. Chem. Soc.* **2006**, *128*, 12368–12369.

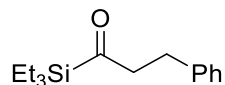

**3-Phenyl-1-(triethylsilyl)propan-1-one.**<sup>9</sup> The title compound was synthesized according to **General Procedure C** from (1,3-dithian-2-yl)triethylsilane (2.13 g, 9.10 mmol). The product was purified by flash chromatography (0 → 3% EtOAc in hexanes), which provided 1.08 g (48% yield over two steps) of a colorless oil.

<sup>1</sup>H NMR (300 MHz, CDCl<sub>3</sub>) δ 7.31 – 7.24 (m, 2H), 7.22 – 7.13 (m, 3H), 2.95 – 2.76 (m, 4H), 0.96 (t, *J* = 7.8 Hz, 9H), 0.73 (q, *J* = 7.9 Hz, 6H).

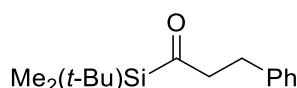

**1-(Tert-butyl dimethylsilyl)-3-phenylpropan-1-one.**<sup>10</sup> The title compound was synthesized according to **General Procedure C** from *tert*-butyl(1,3-dithian-2-yl)dimethylsilane (4.00 g, 17.1 mmol). The product was purified by flash chromatography (0 → 2% EtOAc in hexanes), which provided 4.25 g (>99% yield of nominally pure material over two steps) of a white solid.

<sup>1</sup>H NMR (300 MHz, CDCl<sub>3</sub>) δ 7.40 – 7.30 (m, 2H), 7.30 – 7.20 (m, 3H), 3.07 – 2.78 (m, 4H), 0.99 (s, 9H), 0.25 (s, 6H).

**General Procedure D: Reduction of acylsilanes (for substrates that lack an aryl substituent on silicon).** In a round-bottom flask charged with a stir bar, LiAlH<sub>4</sub> (4.9 equiv) was slowly dissolved in THF (~40 mL/mmol of acyl silane) at 0 °C. The resulting solution was stirred for 10 min. A solution of the acyl silane in THF (~1.5 mL/mmol of acyl silane) was added in a slow, steady stream to the solution of LiAlH<sub>4</sub> at 0 °C. Next, the reaction mixture was warmed to room temperature and stirred for 3 h. The reaction was then quenched and worked up using the Fieser method.

(9) Reddy, G. P.; Reddy, J. S.; Das, S.; Roisnel, T.; Yadav, J. S.; Chandrasekhar, S.; Gree, R. *Org. Lett.* **2013**, *15*, 1524–1527.

(10) Reich, H. J.; Holtan, R. C.; Bolm, C. *J. Am. Chem. Soc.* **1990**, *112*, 5609–5617.

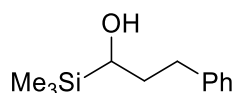

**3-Phenyl-1-(trimethylsilyl)propan-1-ol.**<sup>11</sup> The title compound was synthesized according to **General Procedure D** from 3-phenyl-1-(trimethylsilyl)propan-1-one (1.84 g, 9.8 mmol). The product was purified by flash chromatography (5 → 10% EtOAc in hexanes), which provided 1.65 g (89% yield) of a colorless oil.

<sup>1</sup>H NMR (400 MHz, CDCl<sub>3</sub>) δ 7.34 – 7.27 (m, 2H), 7.25 – 7.17 (m, 3H), 3.39 – 3.29 (m, 1H), 2.99 – 2.87 (m, 1H), 2.71 – 2.61 (m, 1H), 1.91 – 1.74 (m, 2H), 1.11 (s, 1H), 0.05 (s, 9H).

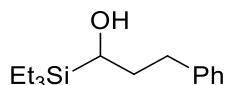

**3-Phenyl-1-(triethylsilyl)propan-1-ol.** The title compound was synthesized according to **General Procedure D** from 3-phenyl-1-(triethylsilyl)propan-1-one (1.08 g, 4.35 mmol). The product was purified by flash chromatography (5% EtOAc in hexanes), which provided 0.82 g (75% yield) of a colorless oil.

<sup>1</sup>H NMR (400 MHz, CDCl<sub>3</sub>) δ 7.33 – 7.26 (m, 2H), 7.24 – 7.12 (m, 3H), 3.51 (dd, J = 11.2, 2.9 Hz, 1H), 2.96 (ddd, J = 13.7, 9.8, 5.0 Hz, 1H), 2.66 (tdd, J = 13.6, 8.7, 6.9 Hz, 1H), 1.96 – 1.75 (m, 2H), 1.50 (s, 1H), 1.03 – 0.93 (m, 9H), 0.68 – 0.49 (m, 6H);

<sup>13</sup>C NMR (101 MHz, CDCl<sub>3</sub>) δ 140.6, 126.83, 126.77, 124.1, 62.5, 34.3, 31.9, 5.9, 0.0;

FT-IR (thin film) 3448, 3026, 2953, 1708, 1604, 1496, 1455, 1415, 1260, 1239, 1018, 912 cm<sup>-1</sup>;

HR-MS (FAB+) m/z [M+H]<sup>+</sup>-H<sub>2</sub> calcd for C<sub>15</sub>H<sub>25</sub>OSi: 249.1675, found: 249.1679.

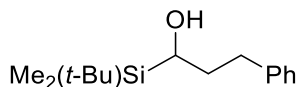

**1-(Tert-butyldimethylsilyl)-3-phenylpropan-1-ol.** The title compound was synthesized according to **General Procedure D** from 1-(tert-butyldimethylsilyl)-3-phenylpropan-1-one (2.49 g, 10.0 mmol). The product was purified by flash chromatography (0 → 15% EtOAc in hexanes), which provided 1.75 g (70% yield) of a colorless oil.

<sup>1</sup>H NMR (400 MHz, CDCl<sub>3</sub>) δ 7.34 – 7.27 (m, 2H), 7.25 – 7.15 (m, 3H), 3.53 (dd, J = 9.8, 4.2 Hz, 1H), 2.96 (ddd, J = 13.6, 9.0, 6.0 Hz, 1H), 2.65 (ddd, J = 13.5, 8.9, 7.2 Hz, 1H), 1.96 – 1.77 (m, 2H), 1.08 (s, 1H), 0.94 (s, 9H), 0.02 (s, 3H), -0.04 (s, 3H);

<sup>13</sup>C NMR (101 MHz, CDCl<sub>3</sub>) δ 142.6, 128.82, 128.77, 126.2, 64.4, 36.7, 33.8, 27.4, 17.1, -7.2, -8.2;

FT-IR (thin film) 3467, 3027, 2954, 1604, 1496, 1471, 1362, 1255, 1024, 914, 832 cm<sup>-1</sup>;

HR-MS (FAB+) m/z [M+H]<sup>+</sup>-H<sub>2</sub> calcd for C<sub>15</sub>H<sub>25</sub>OSi: 249.1675, found: 249.1673.

(11) Goddard, J.-P.; Le Gall, T.; Mioskowski, C. *Org. Lett.* **2000**, *2*, 1455–1456.

**General Procedure E: Preparation of  $\alpha$ -bromosilanes.** PPh<sub>3</sub> (1.50 equiv) and imidazole (1.50 equiv) were dissolved in CH<sub>2</sub>Cl<sub>2</sub> (6.0 mL/mmol of  $\alpha$ -hydroxysilane), and the resulting solution was cooled to 0 °C. At this temperature, I<sub>2</sub> (1.50 equiv) was added in portions, and the resulting mixture was stirred for 10 min. Next, a solution of the  $\alpha$ -hydroxysilane (1.00 equiv) in CH<sub>2</sub>Cl<sub>2</sub> (4.0 mL/mmol) was added in a steady stream, and the resulting mixture was allowed to warm to room temperature and stirred overnight. Then, the reaction mixture was quenched with H<sub>2</sub>O and then extracted with EtOAc. The organic layer was dried over Na<sub>2</sub>SO<sub>4</sub>, filtered, and concentrated. The filtrate was concentrated in vacuo, and the residue was purified by flash chromatography on silica gel to afford the pure product.

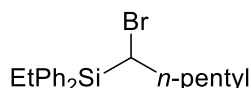

**(1-Bromohexyl)(ethyl)diphenylsilane.** The title compound was synthesized according to **General Procedure E** from 1-(ethyldiphenylsilyl)hexan-1-ol (1.60 g, 5.1 mmol). The product was purified by flash chromatography (2 → 5% EtOAc in hexanes), which provided 1.46 g (76% yield) of a colorless oil.

<sup>1</sup>H NMR (400 MHz, CDCl<sub>3</sub>)  $\delta$  7.66–7.54 (m, 4H), 7.49–7.34 (m, 6H), 3.81 (dd, J = 11.9, 2.7 Hz, 1H), 1.94–1.81 (m, 1H), 1.79–1.62 (m, 2H), 1.47–1.35 (m, 1H), 1.35–1.22 (m, 5H), 1.22–1.12 (m, 1H), 1.04 (t, J = 7.8 Hz, 3H), 0.87 (t, J = 7.0 Hz, 3H);

<sup>13</sup>C NMR (101 MHz, CDCl<sub>3</sub>)  $\delta$  136.0, 135.8, 133.5, 133.0, 130.0, 129.9, 128.1, 128.0, 41.2, 33.6, 31.1, 29.1, 22.8, 14.3, 7.6, 4.4;

FT-IR (thin film) 3070, 2959, 1458, 1428, 1261, 1106, 1029, 802 cm<sup>-1</sup>;

HR-MS (FAB+) m/z [M]<sup>+</sup> calcd for C<sub>20</sub>H<sub>27</sub><sup>79</sup>BrSi: 374.1065, found: 374.1060.

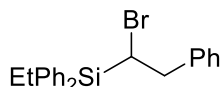

**(1-Bromo-2-phenylethyl)(ethyl)diphenylsilane.** The title compound was synthesized according to **General Procedure E** from 1-(ethyldiphenylsilyl)-2-phenylethan-1-ol (0.70 g, 2.11 mmol). The product was purified by flash chromatography (20% CHCl<sub>3</sub> in hexanes), which provided 0.64 g (76% yield) of a colorless oil.

<sup>1</sup>H NMR (400 MHz, CDCl<sub>3</sub>)  $\delta$  7.74 – 7.60 (m, 4H), 7.52 – 7.38 (m, 6H), 7.32 – 7.21 (m, 3H), 7.20 – 7.15 (m, 2H), 3.98 (dd, J = 12.3, 2.7 Hz, 1H), 3.36 (dd, J = 15.2, 2.6 Hz, 1H), 2.86 (dd, J = 15.1, 12.3 Hz, 1H), 1.41 – 1.19 (m, 2H), 1.13 – 0.99 (m, 3H);

<sup>13</sup>C NMR (101 MHz, CDCl<sub>3</sub>)  $\delta$  140.4, 136.1, 135.9, 133.2, 132.7, 130.3, 130.2, 129.1, 128.6, 128.4, 128.3, 126.9, 40.9, 40.0, 7.7, 4.6;

FT-IR (thin film) 3068, 2962, 1588, 1496, 1454, 1427, 1261, 1105, 1030, 801 cm<sup>-1</sup>;

HR-MS (FAB+) m/z [M]<sup>+</sup> calcd for C<sub>22</sub>H<sub>23</sub><sup>79</sup>BrSi: 394.0752, found: 394.0762.

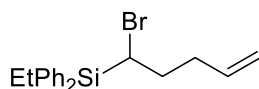

**(1-Bromopent-4-en-1-yl)(ethyl)diphenylsilane.** The title compound was synthesized according to **General Procedure E** from 1-(ethyldiphenylsilyl)pent-4-en-1-ol (1.06 g, 3.58 mmol). The product was purified by flash chromatography (5 → 20% CHCl<sub>3</sub> in hexanes), which provided 0.87 g (68% yield) of a colorless oil.

<sup>1</sup>H NMR (400 MHz, CDCl<sub>3</sub>) δ 7.65 – 7.55 (m, 4H), 7.48 – 7.35 (m, 6H), 5.72 (dddd, J = 17.1, 10.1, 7.7, 5.9 Hz, 1H), 5.11 – 4.98 (m, 2H), 3.83 (dd, J = 12.3, 2.5 Hz, 1H), 2.49 – 2.33 (m, 1H), 2.27 – 2.15 (m, 1H), 2.01 – 1.89 (m, 1H), 1.80 (dddd, J = 14.9, 12.3, 7.8, 4.5 Hz, 1H), 1.36 – 1.19 (m, 2H), 1.07 – 0.98 (m, 3H);

<sup>13</sup>C NMR (101 MHz, CDCl<sub>3</sub>) δ 137.3, 136.1, 135.9, 133.4, 132.9, 130.13, 130.08, 128.24, 128.18, 116.5, 40.0, 33.2, 32.8, 7.6, 4.5;

FT-IR (thin film) 3070, 2961, 1640, 1589, 1488, 1428, 1261, 1110, 1028, 916, 803 cm<sup>-1</sup>;

HR-MS (FAB+) m/z [M]<sup>+</sup> calcd for C<sub>19</sub>H<sub>23</sub><sup>79</sup>BrSi: 358.0752, found: 358.0746.

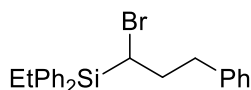

**(1-Bromo-3-phenylpropyl)(ethyl)diphenylsilane.** The title compound was synthesized according to **General Procedure E** from 1-(ethyldiphenylsilyl)-3-phenylpropan-1-ol (1.21 g, 3.49 mmol). The product was purified by flash chromatography (0 → 5% EtOAc in hexanes), which provided 1.07 g (75% yield) of a colorless oil.

<sup>1</sup>H NMR (400 MHz, CDCl<sub>3</sub>) δ 7.59 – 7.53 (m, 2H), 7.49 – 7.26 (m, 10H), 7.25 – 7.19 (m, 1H), 7.18 – 7.11 (m, 2H), 3.72 (dd, J = 12.2, 2.2 Hz, 1H), 3.00 (ddd, J = 13.8, 7.9, 4.3 Hz, 1H), 2.73 (dt, J = 13.6, 8.1 Hz, 1H), 2.24 – 2.11 (m, 1H), 2.01 (dddd, J = 15.0, 12.1, 7.8, 4.3 Hz, 1H), 1.31 – 1.16 (m, 2H), 1.03 – 0.88 (m, 3H);

<sup>13</sup>C NMR (101 MHz, CDCl<sub>3</sub>) δ 140.8, 135.7, 135.5, 133.0, 132.4, 129.8, 129.7, 128.8, 128.4, 127.87, 127.86, 126.1, 39.3, 35.1, 34.7, 7.2, 4.2;

FT-IR (thin film) 3069, 2961, 1589, 1496, 1454, 1428, 1261, 1110, 802 cm<sup>-1</sup>;

HR-MS (FAB+) m/z [M-C<sub>2</sub>H<sub>5</sub>]<sup>+</sup> calcd for C<sub>21</sub>H<sub>20</sub><sup>79</sup>BrSi: 379.0518, found: 379.0504.

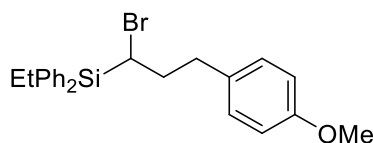

**(1-Bromo-3-(4-methoxyphenyl)propyl)(ethyl)diphenylsilane.** The title compound was synthesized according to **General Procedure E** from 1-(ethyldiphenylsilyl)-3-(4-methoxyphenyl)propan-1-ol (2.20 g, 5.8 mmol). The product was purified by flash chromatography (0 → 5% EtOAc in hexanes), which provided 1.68 g (65% yield) of a colorless oil.

$^1\text{H}$  NMR (300 MHz,  $\text{CDCl}_3$ )  $\delta$  7.65–7.58 (m, 2H), 7.55–7.49 (m, 2H), 7.49–7.34 (m, 6H), 7.17–7.08 (m, 2H), 6.93–6.85 (m, 2H), 3.84 (s, 3H), 3.77 (dd,  $J = 12.1, 2.3$  Hz, 1H), 2.97 (ddd,  $J = 13.6, 7.4, 4.3$  Hz, 1H), 2.74 (dt,  $J = 13.8, 8.2$  Hz, 1H), 2.19 (dtd,  $J = 15.1, 7.8, 2.2$  Hz, 1H), 2.03 (dddd,  $J = 15.0, 12.0, 7.6, 4.3$  Hz, 1H), 1.39–1.24 (m, 2H), 1.03 (t,  $J = 7.7$  Hz, 3H);

$^{13}\text{C}$  NMR (101 MHz,  $\text{CDCl}_3$ )  $\delta$  158.2, 135.9, 135.7, 133.2, 133.0, 132.6, 130.00, 129.95, 129.9, 128.1, 128.0, 114.0, 55.4, 39.5, 35.5, 33.9, 7.5, 4.4;

FT-IR (thin film) 3070, 2955, 1611, 1512, 1428, 1301, 1247, 1177, 1111, 1037, 807  $\text{cm}^{-1}$ ;

HR-MS (FAB+)  $m/z$   $[\text{M}]^+$  calcd for  $\text{C}_{24}\text{H}_{27}^{81}\text{BrOSi}$ : 440.0991, found: 440.0997.

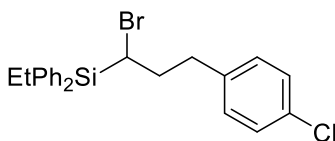

**(1-Bromo-3-(4-chlorophenyl)propyl)(ethyl)diphenylsilane.** The title compound was synthesized according to **General Procedure E** from 3-(4-chlorophenyl)-1-(ethyldiphenylsilyl)propan-1-ol (1.13 g, 2.97 mmol). The product was purified by flash chromatography (5 → 10% EtOAc in hexanes), which provided 0.63 g (48% yield) of a colorless oil.

$^1\text{H}$  NMR (400 MHz,  $\text{CDCl}_3$ )  $\delta$  7.60–7.54 (m, 2H), 7.49–7.32 (m, 8H), 7.26 (d,  $J = 8.4$  Hz, 2H), 7.08 (d,  $J = 8.4$  Hz, 2H), 3.67 (dd,  $J = 12.2, 2.3$  Hz, 1H), 2.95 (ddd,  $J = 13.7, 7.6, 4.2$  Hz, 1H), 2.72 (dt,  $J = 13.8, 8.0$  Hz, 1H), 2.13 (dddd,  $J = 15.1, 8.6, 7.7, 2.2$  Hz, 1H), 1.99 (dddd,  $J = 15.1, 12.1, 7.6, 4.3$  Hz, 1H), 1.31–1.21 (m, 2H), 0.99 (t,  $J = 7.8$  Hz, 3H);

$^{13}\text{C}$  NMR (101 MHz,  $\text{CDCl}_3$ )  $\delta$  139.4, 135.9, 135.7, 133.1, 132.5, 132.1, 130.4, 130.1, 130.0, 128.8, 128.14, 128.12, 39.2, 35.1, 34.2, 7.5, 4.3;

FT-IR (thin film) 3069, 2955, 1589, 1492, 1428, 1262, 1218, 1152, 1112, 1015, 998, 956, 843, 812  $\text{cm}^{-1}$ ;

HR-MS (FAB+)  $m/z$   $[\text{M}-\text{Br}]^+$  calcd for  $\text{C}_{23}\text{H}_{24}\text{ClSi}$ : 363.1336, found: 363.1333.

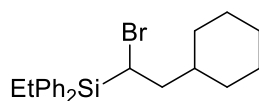

**(1-Bromo-2-cyclohexylethyl)(ethyl)diphenylsilane.** The title compound was synthesized according to **General Procedure E** from 2-cyclohexyl-1-(ethyldiphenylsilyl)ethan-1-ol (2.24 g, 6.6 mmol). The product was purified by flash chromatography (0 → 5% EtOAc in hexanes), which provided 1.58 g (59% yield) of a colorless oil.

$^1\text{H}$  NMR (300 MHz,  $\text{CDCl}_3$ )  $\delta$  7.65–7.48 (m, 4H), 7.45–7.33 (m, 6H), 3.96 (dd,  $J$  = 12.4, 2.1 Hz, 1H), 1.92 (d,  $J$  = 12.5 Hz, 1H), 1.78–1.59 (m, 5H), 1.59–1.47 (m, 1H), 1.33–1.07 (m, 6H), 1.02 (t,  $J$  = 7.8 Hz, 3H), 0.93–0.80 (m, 1H), 0.71 (qd,  $J$  = 12.4, 3.4 Hz, 1H);

$^{13}\text{C}$  NMR (101 MHz,  $\text{CDCl}_3$ )  $\delta$  136.0, 135.8, 133.5, 132.9, 130.0, 129.9, 128.1, 128.0, 40.9, 37.8, 35.7, 34.3, 31.2, 26.8, 26.5, 26.2, 7.5, 4.4;

FT-IR (thin film) 3069, 2923, 1589, 1488, 1448, 1428, 1261, 1110, 1029, 803  $\text{cm}^{-1}$ ;

HR-MS (EI+)  $m/z$   $[\text{M}]^+$  calcd for  $\text{C}_{22}\text{H}_{29}^{79}\text{BrSi}$ : 400.1222, found: 400.1251.

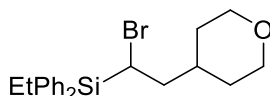

**(1-Bromo-2-(tetrahydro-2H-pyran-4-yl)ethyl)(ethyl)diphenylsilane.** The title compound was synthesized according to **General Procedure E** from 1-(ethyldiphenylsilyl)-2-(tetrahydro-2H-pyran-4-yl)ethan-1-ol (1.55 g, 4.6 mmol). The product was purified by flash chromatography (3 → 5% EtOAc in hexanes), which provided 1.25 g (68% yield) of a colorless oil.

$^1\text{H}$  NMR (400 MHz,  $\text{CDCl}_3$ )  $\delta$  7.63–7.53 (m, 4H), 7.48–7.34 (m, 6H), 3.98 (dd,  $J$  = 11.4, 4.2 Hz, 1H), 3.92 (dd,  $J$  = 12.9, 2.3 Hz, 1H), 3.89 (dd,  $J$  = 11.4, 4.4 Hz, 1H), 3.38 (dtd,  $J$  = 16.8, 11.9, 2.3 Hz, 2H), 1.99–1.85 (m, 1H), 1.84–1.70 (m, 2H), 1.62 (ddd,  $J$  = 15.0, 10.0, 2.4 Hz, 1H), 1.49–1.40 (m, 1H), 1.34–1.18 (m, 3H), 1.11 (td,  $J$  = 12.1, 4.5 Hz, 1H), 1.02 (t,  $J$  = 7.8 Hz, 3H);

$^{13}\text{C}$  NMR (101 MHz,  $\text{CDCl}_3$ )  $\delta$  136.0, 135.8, 133.2, 132.6, 130.1, 130.0, 128.2, 128.1, 68.2, 68.1, 40.3, 36.7, 33.7, 33.2, 31.2, 7.5, 4.4;

FT-IR (thin film) 3070, 2929, 1428, 1190, 1111, 1012, 849  $\text{cm}^{-1}$ ;

HR-MS (FAB+)  $m/z$   $[\text{M}+\text{H}]^+ - \text{H}_2$  calcd for  $\text{C}_{21}\text{H}_{26}^{79}\text{BrOSi}$ : 401.0936, found: 401.0918.

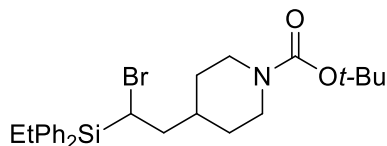

**Tert-butyl 4-(2-bromo-2-(ethyldiphenylsilyl)ethyl)piperidine-1-carboxylate.** The title compound was synthesized according to **General Procedure E** from *tert*-butyl 4-(2-(ethyldiphenylsilyl)-2-hydroxyethyl)piperidine-1-carboxylate (2.40 g, 5.5 mmol). The product

was purified by flash chromatography (3 → 7% EtOAc in hexanes), which provided 2.02 g (74% yield) of a colorless oil.

$^1\text{H}$  NMR (400 MHz,  $\text{CDCl}_3$ )  $\delta$  7.64–7.53 (m, 4H), 7.48–7.36 (m, 6H), 4.13 (br s, 1H), 4.04 (br s, 1H), 3.92 (dd,  $J$  = 12.8, 2.1 Hz, 1H), 2.69 (q,  $J$  = 11.5 Hz, 2H), 1.95–1.73 (m, 3H), 1.60 (ddd,  $J$  = 14.8, 9.7, 2.2 Hz, 1H), 1.55–1.47 (m, 1H), 1.45 (s, 9H), 1.32–1.24 (m, 2H), 1.16–1.06 (m, 1H), 1.03 (t,  $J$  = 7.9 Hz, 3H), 0.96–0.89 (m, 1H);

$^{13}\text{C}$  NMR (101 MHz,  $\text{CDCl}_3$ )  $\delta$  155.0, 135.9, 135.7, 133.1, 132.5, 130.1, 130.0, 128.2, 128.1, 79.5, 43.9 (br; two carbons), 40.0, 37.0, 34.3, 32.9, 30.2, 28.7, 7.5, 4.3;

FT-IR (thin film) 3070, 2931, 1694, 1428, 1365, 1261, 1162, 1111, 1026, 865  $\text{cm}^{-1}$ ;

HR-MS (FAB+)  $m/z$   $[\text{M}+\text{H}]^+ - \text{H}_2$  calcd for  $\text{C}_{26}\text{H}_{35}^{79}\text{BrNO}_2\text{Si}$ : 500.1620, found: 500.1618.

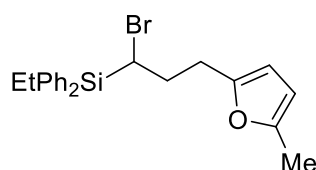

**(1-Bromo-3-(5-methylfuran-2-yl)propyl)(ethyl)diphenylsilane.** The title compound was synthesized according to **General Procedure E** from 1-(ethyldiphenylsilyl)-3-(5-methylfuran-2-yl)propan-1-ol (1.94 g, 5.5 mmol). The product was purified by flash chromatography (0 → 5% EtOAc in hexanes), which provided 1.14 g (50% yield) of a colorless oil.

$^1\text{H}$  NMR (400 MHz,  $\text{CDCl}_3$ )  $\delta$  7.63–7.55 (m, 2H), 7.55–7.48 (m, 2H), 7.48–7.30 (m, 6H), 5.94–5.80 (m, 2H), 3.76 (dd,  $J$  = 12.4, 2.0 Hz, 1H), 2.90 (ddd,  $J$  = 15.1, 7.0, 4.5 Hz, 1H), 2.77 (ddd,  $J$  = 15.7, 8.6, 7.4 Hz, 1H), 2.26 (s, 3H), 1.92 (dddd,  $J$  = 15.1, 12.4, 7.1, 4.2 Hz, 1H), 1.31–1.24 (m, 2H), 0.99 (t,  $J$  = 7.8 Hz, 3H);

$^{13}\text{C}$  NMR (101 MHz,  $\text{CDCl}_3$ )  $\delta$  152.7, 150.9, 136.0, 135.8, 133.2, 132.6, 130.05, 129.96, 128.10, 128.08, 107.0, 106.1, 39.4, 32.3, 27.4, 13.8, 7.4, 4.4;

FT-IR (thin film) 3070, 2960, 1568, 1428, 1261, 1109, 1020, 800  $\text{cm}^{-1}$ ;

HR-MS (FAB+)  $m/z$   $[\text{M}+\text{H}]^+$  calcd for  $\text{C}_{22}\text{H}_{25}^{79}\text{BrOSi}$ : 412.0858, found: 412.0840.

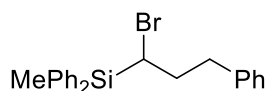

**(1-Bromo-3-phenylpropyl)(methyl)diphenylsilane.** The title compound was synthesized according to **General Procedure E** from 1-(methyldiphenylsilyl)-3-phenylpropan-1-ol (1.00 g, 3.01 mmol). The product was purified by flash chromatography (0 → 5% EtOAc in hexanes), which provided 2.03 g (86% yield) of a colorless oil.

$^1\text{H}$  NMR (400 MHz,  $\text{CDCl}_3$ )  $\delta$  7.55 – 7.48 (m, 4H), 7.46 – 7.27 (m, 8H), 7.24 – 7.17 (m, 1H), 7.17 – 7.10 (m, 2H), 3.68 (dd,  $J$  = 11.8, 2.7 Hz, 1H), 3.01 (ddd,  $J$  = 12.9, 8.0, 4.4 Hz, 1H), 2.77 – 2.69 (m, 1H), 2.23 – 1.97 (m, 2H), 0.71 (s, 3H);



$^{13}\text{C}$  NMR (101 MHz,  $\text{CDCl}_3$ )  $\delta$  141.1, 135.4, 135.3, 134.6, 134.3, 130.13, 130.07, 129.1, 128.8, 128.3, 128.2, 126.4, 40.7, 35.4, 35.1, -5.2;

FT-IR (thin film) 3069, 2962, 1603, 1589, 1496, 1454, 1428, 1260, 1113, 1029, 998  $\text{cm}^{-1}$ ;

HR-MS (FAB+)  $m/z$   $[\text{M}-\text{C}_6\text{H}_6]^+$  calcd for  $\text{C}_{16}\text{H}_{17}^{79}\text{BrSi}$ : 316.0283, found: 316.0296.

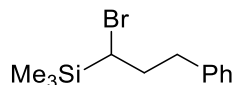

**(1-Bromo-3-phenylpropyl)trimethylsilane.** The title compound was synthesized according to **General Procedure E** from 3-phenyl-1-(trimethylsilyl)propan-1-ol (1.65 g, 7.9 mmol). The product was purified by flash chromatography (0  $\rightarrow$  1% EtOAc in hexanes), which provided 1.80 g (84% yield) of a colorless oil.

$^1\text{H}$  NMR (400 MHz,  $\text{CDCl}_3$ )  $\delta$  7.36 – 7.28 (m, 2H), 7.27 – 7.20 (m, 3H), 3.23 (dd,  $J$  = 11.5, 3.3 Hz, 1H), 3.08 (ddd,  $J$  = 13.3, 8.4, 4.7 Hz, 1H), 2.76 (ddd,  $J$  = 13.6, 8.7, 7.6 Hz, 1H), 2.17 – 1.94 (m, 2H), 0.15 (s, 9H);

$^{13}\text{C}$  NMR (101 MHz,  $\text{CDCl}_3$ )  $\delta$  141.5, 129.0, 128.8, 126.3, 44.6, 35.54, 35.46, -2.7;

FT-IR (thin film) 3027, 2955, 1604, 1496, 1454, 1250, 1110, 1075, 1030, 867, 840  $\text{cm}^{-1}$ ;

HR-MS (EI+)  $m/z$   $[\text{M}]^+$  calcd for  $\text{C}_{12}\text{H}_{19}^{79}\text{BrSi}$ : 270.0439, found: 270.0419.

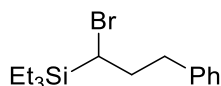

**(1-Bromo-3-phenylpropyl)triethylsilane.** The title compound was synthesized according to **General Procedure E** from 3-phenyl-1-(triethylsilyl)propan-1-ol (4.8 g, 19.3 mmol). The product was purified by flash chromatography (0  $\rightarrow$  2% EtOAc in hexanes), which provided 3.38 g (56% yield) of a colorless oil.

$^1\text{H}$  NMR (400 MHz,  $\text{CDCl}_3$ )  $\delta$  7.33 – 7.27 (m, 2H), 7.25 – 7.18 (m, 3H), 3.37 – 3.27 (m, 1H), 3.07 (ddd,  $J$  = 13.3, 7.3, 5.5 Hz, 1H), 2.71 (dt,  $J$  = 13.6, 8.1 Hz, 1H), 2.14 – 1.98 (m, 2H), 0.96 (t,  $J$  = 7.9 Hz, 9H), 0.68 (q,  $J$  = 7.4, 6H);

$^{13}\text{C}$  NMR (101 MHz,  $\text{CDCl}_3$ )  $\delta$  141.5, 129.0, 128.8, 126.3, 42.1, 35.9, 35.7, 7.8, 2.9;

FT-IR (thin film) 3027, 2955, 1604, 1496, 1454, 1415, 1260, 1096, 1019, 804  $\text{cm}^{-1}$ ;

HR-MS (FAB+)  $m/z$   $[\text{M}]^+$  calcd for  $\text{C}_{15}\text{H}_{25}^{79}\text{BrSi}$ : 312.0909, found: 312.0918.

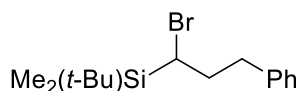

**(1-Bromo-3-phenylpropyl)(tert-butyl)dimethylsilane.** The title compound was synthesized according to **General Procedure E** from 1-(tert-butyl)dimethylsilyl-3-

phenylpropan-1-ol (2.00 g, 8.00 mmol). The product was purified by flash chromatography (0 → 1% EtOAc in hexanes), which provided 1.94 g (77% yield) of a colorless oil.

$^1\text{H}$  NMR (400 MHz,  $\text{CDCl}_3$ )  $\delta$  7.33 – 7.28 (m, 2H), 7.25 – 7.18 (m, 3H), 3.34 (dd,  $J$  = 11.8, 2.8 Hz, 1H), 3.07 (ddd,  $J$  = 13.3, 8.5, 4.5 Hz, 1H), 2.74 (ddd,  $J$  = 13.5, 8.7, 7.6 Hz, 1H), 2.22 – 1.96 (m, 2H), 0.93 (s, 9H), 0.13 (s, 3H), 0.07 (s, 3H);

$^{13}\text{C}$  NMR (101 MHz,  $\text{CDCl}_3$ )  $\delta$  141.5, 129.0, 128.8, 126.4, 42.6, 36.7, 35.6, 27.7, 17.9, –5.6, –6.9;

FT-IR (thin film) 3027, 2958, 2930, 1604, 1496, 1470, 1364, 1259, 1096, 1030, 823  $\text{cm}^{-1}$ ;

HR-MS (FAB+)  $m/z$   $[\text{M}-\text{C}(\text{CH}_3)_3]^+$  calcd for  $\text{C}_{11}\text{H}_{16}^{79}\text{BrSi}$ : 255.0205, found: 255.0208.

### III. Cross-Couplings

**Preparation of alkylzinc reagent.** An oven-dried 40 mL vial was charged with Zn<sup>0</sup> powder (3.0 equiv) and a cross-shaped stir bar. The vial was then sealed with a pierceable septum cap and placed under vacuum on a Schlenk line. Next, the vial was heated with a heat gun for ~4 min, and then it was allowed to cool to room temperature under vacuum. With the aid of an argon-filled balloon, the vial was placed under an argon atmosphere, and then anhydrous DMA was added (1.0 mL/mmol of alkyl bromide, including the 1.0 mL used for the solution of I<sub>2</sub>). To this stirring suspension of Zn<sup>0</sup> powder was added a solution of I<sub>2</sub> (0.050 equiv in 1.0 mL of DMA); the mixture was allowed to stir until the yellow color dissipated. Then, the alkyl bromide (1.0 equiv) was added, vacuum grease was applied to the septum punctures to minimize leakage, and the reaction mixture was warmed to 50 °C and stirred for 16 h. After cooling to room temperature, the argon-filled balloon was removed, and the reaction mixture was brought into a glovebox. The suspension was passed through syringe filters (1-micron and then 0.45-micron) to remove residual zinc powder. The alkylzinc bromide solution (can range from nearly colorless to dark red or dark green) was then titrated with a known amount of I<sub>2</sub> in THF (1.0 mL).<sup>12</sup>

**General Procedure.** An oven-dried 4-mL vial was charged with the  $\alpha$ -bromosilane (0.50 mmol), followed by NiBr<sub>2</sub>-diglyme (15.4 mg, 0.050 mmol) and then L\* (21.4 mg, 0.065 mmol). Next, an oven-dried stir bar was added, and the reaction vial was capped with a pierceable septum cap and wrapped with electrical tape. The reaction vial was placed under high vacuum on a Schlenk line for 10 min. Next, with the aid of an argon-filled balloon, the vial was placed under an argon atmosphere (running the reaction under an atmosphere of nitrogen can lead to lower reproducibility). Then, anhydrous DMA (2.1 mL) was added, and the reaction mixture was allowed to stir for 15 min, after which it appeared cloudy and orange (the reaction mixture should be orange; if there is contamination by oxygen, the reaction mixture may appear nearly colorless). Next, the solution of the alkylzinc bromide (0.60 mmol; the use of solutions between 0.70 M and 1.00 M is recommended) was added as a stream over 10–20 seconds, leading to a dark red-black/brown reaction mixture (if there is contamination by oxygen, the reaction mixture may appear bright red). Vacuum grease was then liberally applied to cover the punctures in the septum cap, the argon balloon was removed, and vacuum grease was applied to cover the puncture. The reaction mixture was then stirred at room temperature at ~800 rpm for 20 h. Next, the reaction mixture was directly transferred to a column of silica gel for purification without any additional workup.

---

(12) Son, S.; Fu, G. C. *J. Am. Chem. Soc.* **2008**, *130*, 2756–2757.

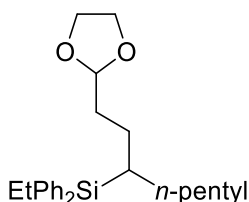

**(1-(1,3-Dioxolan-2-yl)octan-3-yl)(ethyl)diphenylsilane (Table 2, entry 1).** The title compound was synthesized according to the General Procedure from (1-bromohexyl)(ethyl)diphenylsilane (188 mg, 0.500 mmol) and (2-(1,3-dioxolan-2-yl)ethyl)zinc bromide (0.600 mmol). The product was purified by flash chromatography (0 → 3% EtOAc in hexanes). Colorless oil.

(*S,S*)-L\*: 122 mg (62% yield), +90% ee; (*R,R*)-L\*: 133 mg (67% yield), -91% ee.

SFC analysis: The ee was determined via SFC on a CHIRALCEL OJ column (5% *i*-PrOH in supercritical CO<sub>2</sub>, 3.5 mL/min) with *t<sub>r</sub>* = 3.2 min (major (*S,S*)-L\*), 3.7 min (major (*R,R*)-L\*).

<sup>1</sup>H NMR (400 MHz, CDCl<sub>3</sub>) δ 7.58–7.47 (m, 4H), 7.42–7.29 (m, 6H), 4.73 (t, *J* = 4.5 Hz, 1H), 3.97–3.85 (m, 2H), 3.85–3.75 (m, 2H), 1.79–1.65 (m, 2H), 1.65–1.50 (m, 2H), 1.49–1.38 (m, 1H), 1.38–1.25 (m, 3H), 1.25–1.13 (m, 5H), 1.13–1.06 (m, 2H), 0.96 (t, *J* = 7.7 Hz, 3H), 0.82 (t, *J* = 6.9 Hz, 3H);

<sup>13</sup>C NMR (101 MHz, CDCl<sub>3</sub>) δ 135.8, 135.70, 135.68, 135.6, 129.22, 129.21, 127.89, 127.88, 105.0, 65.01, 64.99, 34.1, 32.4, 30.0, 29.5, 24.5, 23.0, 22.8, 14.3, 7.9, 4.5;

FT-IR (thin film) 3068, 2953, 2929, 2873, 1456, 1428, 1140, 1109, 1036, 944 cm<sup>-1</sup>;

HR-MS (FAB+) *m/z* [M+H]<sup>+</sup>-H<sub>2</sub> calcd for C<sub>25</sub>H<sub>35</sub>O<sub>2</sub>Si: 395.2406, found: 395.2392;

[α]<sup>23</sup><sub>D</sub> = -0.8 (*c* = 0.72, CHCl<sub>3</sub>); +90% ee from (*S,S*)-L\*.

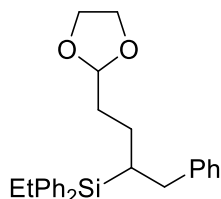

**(4-(1,3-Dioxolan-2-yl)-1-phenylbutan-2-yl)(ethyl)diphenylsilane (Table 2, entry 2).** The title compound was synthesized according to the General Procedure from (1-bromo-2-phenylethyl)(ethyl)diphenylsilane (198 mg, 0.500 mmol) and (2-(1,3-dioxolan-2-yl)ethyl)zinc bromide (0.600 mmol). The product was purified by flash chromatography (10 → 15% EtOAc in hexanes). Colorless waxy solid.

(*S,S*)-L\*: 136 mg (65% yield), +93% ee; (*R,R*)-L\*: 135 mg (65% yield), -94% ee.

SFC analysis: The ee was determined via SFC on a CHIRALPAK IC-3 column (2% *i*-PrOH in supercritical CO<sub>2</sub>, 3.5 mL/min) with *t<sub>r</sub>* = 13.6 min (major (*S,S*)-L\*), 16.2 min (major (*R,R*)-L\*).

<sup>1</sup>H NMR (400 MHz, CDCl<sub>3</sub>) δ 7.61 – 7.54 (m, 4H), 7.43 – 7.34 (m, 6H), 7.25 – 7.20 (m, 2H), 7.17 – 7.12 (m, 3H), 4.59 (t, *J* = 4.6 Hz, 1H), 3.87 – 3.77 (m, 2H), 3.77 – 3.68 (m, 2H), 2.93 (dd, *J* =

14.1, 3.9 Hz, 1H), 2.46 (dd,  $J = 14.1, 10.1$  Hz, 1H), 1.76 – 1.62 (m, 2H), 1.50 – 1.39 (m, 3H), 1.06 (q,  $J = 7.3$  Hz, 2H), 0.93 (t,  $J = 7.6$  Hz, 3H);

$^{13}\text{C}$  NMR (101 MHz,  $\text{CDCl}_3$ )  $\delta$  142.7, 135.50, 135.46, 135.0, 134.9, 129.2, 128.78, 128.77, 128.2, 127.80, 127.79, 125.7, 104.7, 64.7, 64.6, 36.4, 33.6, 25.1, 24.0, 7.6, 4.3;

FT-IR (thin film) 3023, 2952, 2874, 1601, 1495, 1493, 1427, 1134, 1108, 1030, 944  $\text{cm}^{-1}$ ;

HR-MS (FAB+)  $m/z$   $[\text{M}+\text{H}]^+ - \text{H}_2$  calcd for  $\text{C}_{27}\text{H}_{31}\text{O}_2\text{Si}$ : 415.2093, found: 415.2073;

$[\alpha]^{23}_{\text{D}} = -1.4$  ( $c = 0.50$ ,  $\text{CHCl}_3$ ); +93% ee from (*S,S*)-**L\***.

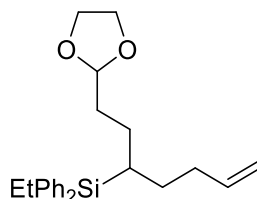

**(1-(1,3-Dioxolan-2-yl)hept-6-en-3-yl)(ethyl)diphenylsilane (Table 2, entry 3).** The title compound was synthesized according to the General Procedure from (1-bromopent-4-en-1-yl)(ethyl)diphenylsilane (180 mg, 0.500 mmol) and (2-(1,3-dioxolan-2-yl)ethyl)zinc bromide (0.600 mmol). The product was purified by flash chromatography (5% EtOAc in hexanes). Colorless oil.

(*S,S*)-**L\***: 100 mg (53% yield), –90% ee; (*R,R*)-**L\***: 104 mg (55% yield), +92% ee.

SFC analysis: The ee was determined via SFC on a CHIRALCEL OJ column (7% *i*-PrOH in supercritical  $\text{CO}_2$ , 3.5 mL/min) with  $t_{\text{r}} = 7.0$  min (major (*S,S*)-**L\***), 3.5 min (major (*R,R*)-**L\***).

$^1\text{H}$  NMR (400 MHz,  $\text{CDCl}_3$ )  $\delta$  7.58 – 7.48 (m, 4H), 7.42 – 7.31 (m, 6H), 5.71 (ddt,  $J = 17.0, 10.2, 6.7$  Hz, 1H), 4.98 – 4.86 (m, 2H), 4.74 (t,  $J = 4.5$  Hz, 1H), 3.96 – 3.84 (m, 2H), 3.87 – 3.74 (m, 2H), 2.16 – 2.04 (m, 1H), 2.03 – 1.92 (m, 1H), 1.79 – 1.63 (m, 3H), 1.62 – 1.53 (m, 1H), 1.51 – 1.37 (m, 2H), 1.37 – 1.29 (m, 1H), 1.12 (q,  $J = 7.8$  Hz, 2H), 0.96 (t,  $J = 7.7$  Hz, 3H);

$^{13}\text{C}$  NMR (101 MHz,  $\text{CDCl}_3$ )  $\delta$  139.0, 135.59, 135.55, 135.4, 135.3, 129.22, 129.20, 127.85, 127.84, 114.7, 104.9, 64.93, 64.90, 33.9, 33.6, 29.4, 24.1, 22.2, 7.8, 4.3;

FT-IR (thin film) 3069, 2952, 2925, 2875, 1427, 1415, 1139, 1108, 1038, 998, 911  $\text{cm}^{-1}$ ;

HR-MS (ESI+)  $m/z$   $[\text{M}+\text{Na}]^+$  calcd for  $\text{C}_{24}\text{H}_{32}\text{NaO}_2\text{Si}$ : 403.2069, found: 403.2066;

$[\alpha]^{23}_{\text{D}} = +4.0$  ( $c = 0.72$ ,  $\text{CHCl}_3$ ); –90% ee from (*S,S*)-**L\***.

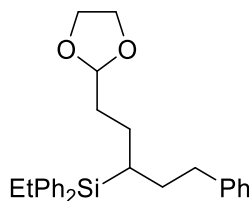

**(1-(1,3-Dioxolan-2-yl)-5-phenylpentan-3-yl)(ethyl)diphenylsilane (Table 2, entry 4).** The title compound was synthesized according to the General Procedure from (1-bromo-3-



HR-MS (FAB+)  $m/z$   $[M+H]^+-H_2$  calcd for  $C_{29}H_{35}O_3Si$ : 459.2356, found: 459.2345;  
 $[\alpha]^{23}_D = +11.9$  ( $c = 0.52$ ,  $CHCl_3$ ); -90% ee from (*S,S*)-**L\***.

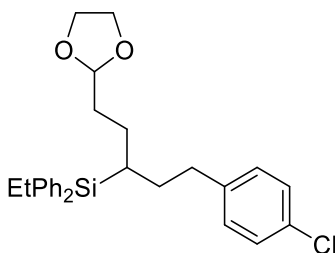

**(1-(4-Chlorophenyl)-5-(1,3-dioxolan-2-yl)pentan-3-yl)(ethyl)diphenylsilane (Table 2, entry 6).** The title compound was synthesized according to the General Procedure from (1-bromo-3-(4-chlorophenyl)propyl)(ethyl)diphenylsilane (222 mg, 0.500 mmol) and (2-(1,3-dioxolan-2-yl)ethyl)zinc bromide (0.600 mmol). The product was purified by flash chromatography (0 → 5% EtOAc in hexanes). Colorless oil.

(*S,S*)-**L\***: 116 mg (50% yield), -90% ee; (*R,R*)-**L\***: 140 mg (60% yield), +92% ee.

SFC analysis: The ee was determined via SFC on a CHIRALCEL OJ column (35% *i*-PrOH in supercritical  $CO_2$ , 3.5 mL/min) with  $t_r = 10.7$  min (major (*S,S*)-**L\***), 4.8 min (major (*R,R*)-**L\***).

$^1H$  NMR (400 MHz,  $CDCl_3$ )  $\delta$  7.56–7.44 (m, 4H), 7.43–7.29 (m, 6H), 7.20 (d,  $J = 8.3$  Hz, 2H), 6.95 (d,  $J = 8.3$  Hz, 2H), 4.76 (t,  $J = 4.6$  Hz, 1H), 3.98–3.87 (m, 2H), 3.87–3.77 (m, 2H), 2.60 (ddd,  $J = 13.7, 10.3, 5.1$  Hz, 1H), 2.45 (ddd,  $J = 13.7, 10.3, 6.6$  Hz, 1H), 1.92–1.67 (m, 3H), 1.66–1.46 (m, 3H), 1.34 (ddt,  $J = 8.7, 7.6, 4.5$  Hz, 1H), 1.16–1.08 (m, 2H), 0.96 (t,  $J = 7.8$  Hz, 3H);

$^{13}C$  NMR (101 MHz,  $CDCl_3$ )  $\delta$  141.2, 135.7, 135.6, 135.4, 135.2, 131.5, 130.0, 129.42, 129.38, 128.5, 128.02, 128.00, 104.8, 65.1, 65.0, 35.1, 33.9, 32.2, 24.2, 22.4, 7.9, 4.4;

FT-IR (thin film) 3068, 2950, 2874, 1491, 1427, 1134, 1108, 1037, 1014, 808  $cm^{-1}$ ;

HR-MS (FAB+)  $m/z$   $[M+H]^+-H_2$  calcd for  $C_{28}H_{32}ClO_2Si$ : 463.1860, found: 463.1869;

$[\alpha]^{23}_D = +14.8$  ( $c = 0.47$ ,  $CHCl_3$ ); -90% ee from (*S,S*)-**L\***.

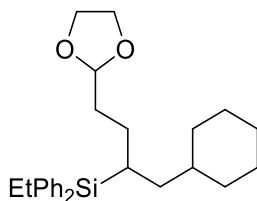

**(1-Cyclohexyl-4-(1,3-dioxolan-2-yl)butan-2-yl)(ethyl)diphenylsilane (Table 2, entry 7).** The title compound was synthesized according to the General Procedure from (1-bromo-2-cyclohexylethyl)(ethyl)diphenylsilane (201 mg, 0.500 mmol) and (2-(1,3-dioxolan-2-yl)ethyl)zinc bromide (0.600 mmol). The product was purified by flash chromatography (0 → 3% EtOAc in hexanes). Colorless oil.

(*S,S*)-**L\***: 132 mg (62% yield), +90% ee; (*R,R*)-**L\***: 119 mg (56% yield), -91% ee.

SFC analysis: The ee was determined via SFC on a CHIRALCEL OJ column (5% *i*-PrOH in supercritical CO<sub>2</sub>, 3.5 mL/min) with *t<sub>r</sub>* = 4.7 min (major (*S,S*)-L\*), 5.6 min (major (*R,R*)-L\*).

<sup>1</sup>H NMR (400 MHz, CDCl<sub>3</sub>) δ 7.58–7.49 (m, 4H), 7.42–7.31 (m, 6H), 4.71 (t, *J* = 4.6 Hz, 1H), 3.95–3.85 (m, 2H), 3.85–3.75 (m, 2H), 1.78 (d, *J* = 13.0 Hz, 1H), 1.74–1.53 (m, 7H), 1.48–1.32 (m, 3H), 1.30–1.07 (m, 7H), 0.96 (t, *J* = 7.7 Hz, 3H), 0.88–0.64 (m, 2H);

<sup>13</sup>C NMR (101 MHz, CDCl<sub>3</sub>) δ 135.74, 135.67, 135.66, 135.6, 129.22, 129.19, 127.88, 127.86, 105.0, 65.0 (two carbons), 38.2, 36.4, 34.6, 34.0, 32.9, 26.9, 26.65, 26.57, 24.9, 19.3, 7.9, 4.4;

FT-IR (thin film) 3068, 2922, 2851, 1448, 1428, 1260, 1229, 1131, 1108, 1033, 945 cm<sup>-1</sup>;

HR-MS (FAB+) *m/z* [M+H]<sup>+</sup>–H<sub>2</sub> calcd for C<sub>27</sub>H<sub>37</sub>O<sub>2</sub>Si: 421.2563, found: 421.2576;

[α]<sup>23</sup><sub>D</sub> = –4.1 (*c* = 0.48, CHCl<sub>3</sub>); +90% ee from (*S,S*)-L\*.

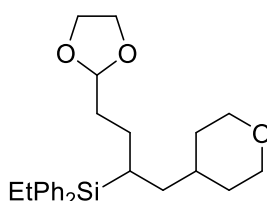

**(4-(1,3-Dioxolan-2-yl)-1-(tetrahydro-2H-pyran-4-yl)butan-2-yl)(ethyl)diphenylsilane (Table 2, entry 8).** The title compound was synthesized according to the General Procedure from (1-bromo-2-(tetrahydro-2H-pyran-4-yl)ethyl)(ethyl)diphenylsilane (202 mg, 0.500 mmol) and (2-(1,3-dioxolan-2-yl)ethyl)zinc bromide (0.600 mmol). The product was purified by flash chromatography (5 → 15% EtOAc in hexanes). Colorless oil.

(*S,S*)-L\*: 136 mg (64% yield), –91% ee; (*R,R*)-L\*: 150 mg (71% yield), +92% ee.

SFC analysis: The ee was determined via SFC on a CHIRALCEL OJ column (10% *i*-PrOH in supercritical CO<sub>2</sub>, 3.5 mL/min) with *t<sub>r</sub>* = 23.6 min (major (*S,S*)-L\*), 3.4 min (major (*R,R*)-L\*).

<sup>1</sup>H NMR (400 MHz, CDCl<sub>3</sub>) δ 7.57–7.47 (m, 4H), 7.42–7.30 (m, 6H), 4.71 (t, *J* = 4.6 Hz, 1H), 3.96–3.74 (m, 6H), 3.25 (tdd, *J* = 11.4, 9.3, 2.2 Hz, 2H), 1.78–1.52 (m, 4H), 1.51–1.36 (m, 5H), 1.30–1.15 (m, 2H), 1.14–1.03 (m, 3H), 0.95 (t, *J* = 7.7 Hz, 3H);

<sup>13</sup>C NMR (101 MHz CDCl<sub>3</sub>) δ 135.7, 135.6, 135.4, 135.2, 129.39, 129.36, 127.98, 127.97, 104.9, 68.33, 68.30, 65.024, 65.016, 37.7, 34.2, 34.0, 33.8, 32.8, 24.8, 19.0, 7.9, 4.3;

FT-IR (thin film) 3069, 2928, 2876, 1427, 1236, 1131, 1108, 1091, 1015, 982 cm<sup>-1</sup>;

HR-MS (FAB+) *m/z* [M+H]<sup>+</sup> calcd for C<sub>26</sub>H<sub>37</sub>O<sub>3</sub>Si: 425.2512, found: 425.2527;

[α]<sup>23</sup><sub>D</sub> = –4.8 (*c* = 0.52, CHCl<sub>3</sub>); –91% ee from (*S,S*)-L\*.



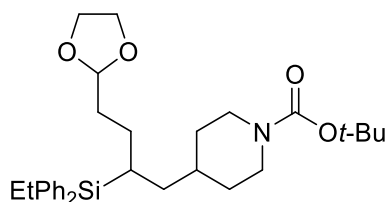

**Tert-butyl 4-(4-(1,3-dioxolan-2-yl)-2-(ethyldiphenylsilyl)butyl)piperidine-1-carboxylate (Table 2, entry 9).** The title compound was synthesized according to the General Procedure from *tert*-butyl 4-(2-bromo-2-(ethyldiphenylsilyl)ethyl)piperidine-1-carboxylate (251 mg, 0.500 mmol) and (2-(1,3-dioxolan-2-yl)ethyl)zinc bromide (0.600 mmol). The product was purified by flash chromatography (5 → 15% EtOAc in hexanes). Colorless oil.

(*S,S*)-L\*: 178 mg (68% yield), –90% ee; (*R,R*)-L\*: 180 mg (69% yield), +90% ee.

SFC analysis: The ee was determined via SFC on a CHIRALPAK AD-H column (10% *i*-PrOH in supercritical CO<sub>2</sub>, 3.5 mL/min) with *t*<sub>r</sub> = 4.6 min (major (*S,S*)-L\*), 3.9 min (major (*R,R*)-L\*).

<sup>1</sup>H NMR (500 MHz, *d*<sub>6</sub>-DMSO, 75 °C) δ 6.98 – 6.88 (m, 4H), 6.85 – 6.75 (m, 6H), 4.16 – 3.96 (m, 1H), 3.23 – 3.07 (m, 4H), 2.02 – 1.88 (m, 4H), 1.10 – 1.01 (m, 2H), 1.00 – 0.74 (m, 16H), 0.69 – 0.59 (m, 1H), 0.53 (q, *J* = 8.0, 2.5 Hz, 2H), 0.37 (t, *J* = 7.6 Hz, 3H), 0.32 – 0.13 (m, 2H);

<sup>13</sup>C NMR (126 MHz, *d*<sub>6</sub>-DMSO, 75 °C) δ 154.5, 135.7, 135.63, 135.56, 135.5, 129.68, 129.66, 128.34, 128.33, 104.4, 79.0, 64.75, 64.72, 44.2 (br; two carbons), 37.5, 34.9, 33.9, 33.1, 32.0, 28.8, 25.2, 19.8, 8.1, 4.0;

FT-IR (thin film) 3069, 2929, 2875, 1693, 1427, 1365, 1281, 1241, 1169, 1109, 1033, 947 cm<sup>-1</sup>;

HR-MS (FAB+) *m/z* [M+H]<sup>+</sup>–H<sub>2</sub> calcd for C<sub>31</sub>H<sub>44</sub>NO<sub>4</sub>Si: 522.3040, found: 522.3051;

[α]<sub>D</sub><sup>23</sup> = +8.2 (*c* = 0.56, CHCl<sub>3</sub>); –90% ee from (*S,S*)-L\*.

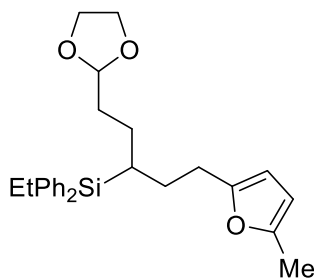

**(1-(1,3-Dioxolan-2-yl)-5-(5-methylfuran-2-yl)pentan-3-yl)(ethyl)diphenylsilane (Table 2, entry 10).** The title compound was synthesized according to the General Procedure from (1-bromo-3-(5-methylfuran-2-yl)propyl)(ethyl)diphenylsilane (207 mg, 0.500 mmol) and (2-(1,3-dioxolan-2-yl)ethyl)zinc bromide (0.600 mmol). The product was purified by flash chromatography (0 → 5% EtOAc in hexanes). Pale-yellow oil.

(*S,S*)-L\*: 152 mg (70% yield), –89% ee; (*R,R*)-L\*: 158 mg (73% yield), +91% ee.

SFC analysis: The ee was determined via SFC on a CHIRALCEL OJ column (15% *i*-PrOH in supercritical CO<sub>2</sub>, 3.5 mL/min) with *t*<sub>r</sub> = 11.6 min (major (*S,S*)-L\*), 8.1 min (major (*R,R*)-L\*).

$^1\text{H}$  NMR (400 MHz,  $\text{CDCl}_3$ )  $\delta$  7.54–7.45 (m, 4H), 7.41–7.30 (m, 6H), 5.82 (dd,  $J = 3.0, 1.0$  Hz, 1H), 5.76 (d,  $J = 3.0$  Hz, 1H), 4.73 (t,  $J = 4.6$  Hz, 1H), 3.95–3.85 (m, 2H), 3.85–3.75 (m, 2H), 2.60 (ddd,  $J = 14.7, 9.3, 5.4$  Hz, 1H), 2.50 (ddd,  $J = 15.8, 8.7, 7.2$  Hz, 1H), 2.24 (d,  $J = 0.6$  Hz, 3H), 1.93 (dddd,  $J = 13.8, 9.3, 7.0, 4.3$  Hz, 1H), 1.80–1.56 (m, 4H), 1.52–1.40 (m, 1H), 1.34 (ddt,  $J = 8.4, 7.2, 4.3$  Hz, 1H), 1.11 (q,  $J = 7.8$  Hz, 2H), 0.94 (t,  $J = 7.8$  Hz, 3H);

$^{13}\text{C}$  NMR (101 MHz,  $\text{CDCl}_3$ )  $\delta$  154.4, 150.4, 135.7, 135.6, 135.4, 135.3, 129.4, 129.3, 127.97, 125.95, 105.9, 105.8, 104.9, 65.03, 65.00, 33.9, 28.6, 27.8, 24.1, 21.9, 13.8, 7.9, 4.4;

FT-IR (thin film) 3068, 2951, 2875, 1568, 1427, 1218, 1134, 1108, 1021, 943  $\text{cm}^{-1}$ ;

HR-MS (FAB+)  $m/z$   $[\text{M}+\text{H}]^+ - \text{H}_2$  calcd for  $\text{C}_{27}\text{H}_{33}\text{O}_3\text{Si}$ : 433.2199, found: 433.2181;

$[\alpha]^{23}_{\text{D}} = -3.8$  ( $c = 0.58$ ,  $\text{CHCl}_3$ );  $-89\%$  ee from (*S,S*)-**L\***.

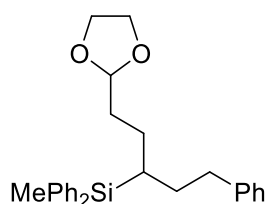

**(1-(1,3-Dioxolan-2-yl)-5-phenylpentan-3-yl)(methyl)diphenylsilane (Table 2, entry 11).**

The title compound was synthesized according to the General Procedure from (1-bromo-3-phenylpropyl)(methyl)diphenylsilane (198 mg, 0.500 mmol) and (2-(1,3-dioxolan-2-yl)ethyl)zinc bromide (0.600 mmol). The product was purified by flash chromatography (0  $\rightarrow$  7% EtOAc in hexanes). Colorless oil.

(*S,S*)-**L\***: 163 mg (78% yield),  $-86\%$  ee; (*R,R*)-**L\***: 170 mg (82% yield),  $+84\%$  ee.

HPLC analysis: The ee was determined via SFC on a CHIRALCEL OJ column (15% *i*-PrOH in hexane, 3.5 mL/min) with  $t_{\text{r}} = 8.7$  min (major (*S,S*)-**L\***), 4.4 min (major (*R,R*)-**L\***).

$^1\text{H}$  NMR (400 MHz,  $\text{CDCl}_3$ )  $\delta$  7.58 – 7.47 (m, 4H), 7.43 – 7.30 (m, 6H), 7.26 – 7.21 (m, 2H), 7.20 – 7.13 (m, 1H), 7.07 – 6.98 (m, 2H), 4.76 (t,  $J = 4.3$  Hz, 1H), 4.00 – 3.87 (m, 2H), 3.86 – 3.75 (m, 2H), 2.64 (ddd,  $J = 13.4, 10.5, 5.2$  Hz, 1H), 2.47 (ddd,  $J = 13.4, 10.5, 6.3$  Hz, 1H), 1.95 – 1.57 (m, 6H), 1.35 (tt,  $J = 7.2, 4.7$  Hz, 1H), 0.61 (s, 3H);

$^{13}\text{C}$  NMR (101 MHz,  $\text{CDCl}_3$ )  $\delta$  142.8, 137.0, 136.8, 135.02, 134.95, 129.35, 129.32, 128.7, 128.4, 128.03, 128.02, 125.9, 104.9, 65.01, 64.99, 35.7, 33.7, 32.2, 24.2, 23.4,  $-5.1$ ;

FT-IR (thin film) 3067, 3023, 2924, 2858, 1602, 1495, 1454, 1427, 1252, 1133, 1110, 1038, 944, 873  $\text{cm}^{-1}$ ;

HR-MS (ESI+)  $m/z$   $[\text{M}+\text{H}]^+ - \text{H}_2$  calcd for  $\text{C}_{27}\text{H}_{31}\text{O}_2\text{Si}$ : 415.2093, found: 415.2083;

$[\alpha]^{23}_{\text{D}} = -5.3$  ( $c = 0.53$ ,  $\text{CHCl}_3$ );  $-86\%$  ee from (*S,S*)-**L\***.

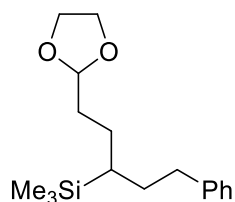

**(1-(1,3-Dioxolan-2-yl)-5-phenylpentan-3-yl)trimethylsilane (Table 2, entry 12).** The title compound was synthesized according to the General Procedure from (1-bromo-3-phenylpropyl)trimethylsilane (137 mg, 0.500 mmol) and (2-(1,3-dioxolan-2-yl)ethyl)zinc bromide (0.600 mmol). The product was purified by flash chromatography (0 → 2% EtOAc in hexanes). Colorless oil.

(*S,S*)-L\*: 114 mg (78% yield), +86% ee; (*R,R*)-L\*: 121 mg (83% yield), -84% ee.

SFC analysis: The ee was determined via SFC on a CHIRALPAK AD-H column (2% *i*-PrOH in supercritical CO<sub>2</sub>, 3.5 mL/min) with *t<sub>r</sub>* = 2.5 min (major (*S,S*)-L\*), 2.8 min (major (*R,R*)-L\*).

<sup>1</sup>H NMR (400 MHz, CDCl<sub>3</sub>) δ 7.33 – 7.25 (m, 2H), 7.21 – 7.15 (m, 3H), 4.84 (t, *J* = 4.7 Hz, 1H), 4.03 – 3.94 (m, 2H), 3.92 – 3.81 (m, 2H), 2.70 (ddd, *J* = 13.5, 10.9, 5.3 Hz, 1H), 2.56 (ddd, *J* = 13.5, 10.9, 6.0 Hz, 1H), 1.82 – 1.45 (m, 6H), 0.67 (tt, *J* = 7.4, 5.1 Hz, 1H), 0.03 (s, 9H);

<sup>13</sup>C NMR (101 MHz, CDCl<sub>3</sub>) δ 143.2, 128.6, 128.5, 125.9, 105.1, 65.08, 65.06, 35.7, 33.5, 32.0, 25.5, 24.0, -1.9;

FT-IR (thin film) 3026, 2950, 2859, 1603, 1496, 1454, 1407, 1248, 1135, 1092, 1040, 944, 855, 834 cm<sup>-1</sup>;

HR-MS (ESI+) *m/z* [M+H]<sup>+</sup>-H<sub>2</sub> calcd for C<sub>17</sub>H<sub>27</sub>O<sub>2</sub>Si: 291.1780, found: 291.1782;

[α]<sup>23</sup><sub>D</sub> = -6.7 (*c* = 0.68, CHCl<sub>3</sub>); +86% ee from (*S,S*)-L\*.

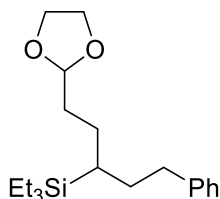

**(1-(1,3-Dioxolan-2-yl)-5-phenylpentan-3-yl)triethylsilane (Table 2, entry 13).** The title compound was synthesized according to the General Procedure from (1-bromo-3-phenylpropyl)triethylsilane (157 mg, 0.500 mmol) and (2-(1,3-dioxolan-2-yl)ethyl)zinc bromide (0.600 mmol). The product was purified by flash chromatography (0 → 5% EtOAc in hexanes). Colorless oil.

(*S,S*)-L\*: 77 mg (46% yield), +92% ee; (*R,R*)-L\*: 92 mg (55% yield), -89% ee.

SFC analysis: The ee was determined via SFC on a CHIRALCEL OJ column (1% *i*-PrOH in supercritical CO<sub>2</sub>, 3.5 mL/min) with *t<sub>r</sub>* = 6.1 min (major (*S,S*)-L\*), 7.3 min (major (*R,R*)-L\*).

<sup>1</sup>H NMR (400 MHz, CDCl<sub>3</sub>) δ 7.31 – 7.23 (m, 2H), 7.21 – 7.12 (m, 3H), 4.83 (t, *J* = 4.7 Hz, 1H), 4.07 – 3.92 (m, 2H), 3.91 – 3.79 (m, 2H), 2.71 (ddd, *J* = 13.4, 11.0, 5.1 Hz, 1H), 2.54 (ddd, *J* = 13.4,

10.9, 5.9 Hz, 1H), 1.84 – 1.44 (m, 6H), 0.94 (t, J = 7.9 Hz, 9H), 0.80 – 0.76 (m, 1H), 0.58 (q, J = 8.1 Hz, 6H);

$^{13}\text{C}$  NMR (101 MHz,  $\text{CDCl}_3$ )  $\delta$  143.2, 128.6, 128.5, 125.9, 105.1, 65.11, 65.08, 36.1, 34.0, 32.3, 24.2, 22.7, 8.0, 3.1;

FT-IR (thin film) 3026, 2951, 2910, 2874, 1496, 1454, 1413, 1238, 1137, 1092, 1040, 1016, 944, 872  $\text{cm}^{-1}$ ;

HR-MS (ESI+)  $m/z$   $[\text{M}+\text{H}]^+-\text{H}_2$  calcd for  $\text{C}_{20}\text{H}_{33}\text{O}_2\text{Si}$ : 333.2250, found: 333.2250;  
 $[\alpha]^{23}_{\text{D}} = -7.0$  ( $c = 0.49$ ,  $\text{CHCl}_3$ ); +92% ee from (*S,S*)-**L\***.

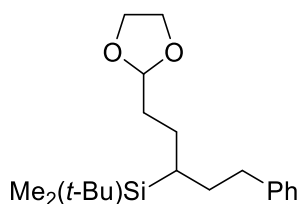

**(1-(1,3-Dioxolan-2-yl)-5-phenylpentan-3-yl)(*tert*-butyl)dimethylsilane (Table 2, entry 14).**

The title compound was synthesized according to the General Procedure from (1-bromo-3-phenylpropyl)(*tert*-butyl)dimethylsilane (157 mg, 0.500 mmol) and (2-(1,3-dioxolan-2-yl)ethyl)zinc bromide (0.600 mmol). The product was purified by flash chromatography (0 → 2% EtOAc in hexanes). Colorless oil.

(*S,S*)-**L\***: 46 mg (27% yield), +84% ee; (*R,R*)-**L\***: 39 mg (23% yield), –85% ee.

SFC analysis: The ee was determined via SFC on a CHIRALCEL OJ column (1% *i*-PrOH in supercritical  $\text{CO}_2$ , 3.5 mL/min) with  $t_r = 3.4$  min (major (*S,S*)-**L\***), 3.8 min (major (*R,R*)-**L\***).

$^1\text{H}$  NMR (400 MHz,  $\text{CDCl}_3$ )  $\delta$  7.31 – 7.24 (m, 2H), 7.22 – 7.15 (m, 3H), 4.84 (t, J = 4.4 Hz, 1H), 4.04 – 3.94 (m, 2H), 3.92 – 3.80 (m, 2H), 2.71 (ddd, J = 13.4, 11.1, 5.0 Hz, 1H), 2.54 (ddd, J = 13.5, 11.0, 5.9 Hz, 1H), 1.89 – 1.47 (m, 6H), 0.89 (s, 9H), 0.87 – 0.81 (m, 1H), –0.01 (s, 6H);

$^{13}\text{C}$  NMR (101 MHz,  $\text{CDCl}_3$ )  $\delta$  143.1, 128.6, 128.5, 125.9, 105.1, 65.11, 65.08, 35.6, 33.4, 32.4, 27.5, 24.2, 22.4, 17.7, –6.0;

FT-IR (thin film) 3026, 2953, 2928, 2856, 1496, 1471, 1409, 1362, 1250, 1138, 1040, 941, 837, 806  $\text{cm}^{-1}$ ;

HR-MS (ESI+)  $m/z$   $[\text{M}+\text{H}]^+-\text{H}_2$  calcd for  $\text{C}_{20}\text{H}_{33}\text{O}_2\text{Si}$ : 333.2250, found: 333.2235;  
 $[\alpha]^{23}_{\text{D}} = -5.5$  ( $c = 0.74$ ,  $\text{CHCl}_3$ ); +84% ee from (*S,S*)-**L\***.

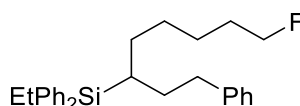

**Ethyl(8-fluoro-1-phenyloctan-3-yl)diphenylsilane (Table 3, entry 1).** The title compound was synthesized according to the General Procedure from (1-bromo-3-phenylpropyl)(ethyl)diphenylsilane (205 mg, 0.500 mmol) and (5-fluoropentyl)zinc bromide

(0.600 mmol). The product was purified by flash chromatography (0 → 25% CH<sub>2</sub>Cl<sub>2</sub> in hexanes). Colorless oil.

(*S,S*)-L\*: 125 mg (58% yield), -87% ee; (*R,R*)-L\*: 118 mg (55% yield), +87% ee.

SFC analysis: The ee was determined via SFC on a CHIRALCEL OJ column (20% *i*-PrOH in supercritical CO<sub>2</sub>, 3.5 mL/min) with *t<sub>r</sub>* = 6.8 min (major (*S,S*)-L\*), 5.5 min (major (*R,R*)-L\*).

<sup>1</sup>H NMR (400 MHz, CDCl<sub>3</sub>) δ 7.55 – 7.46 (m, 4H), 7.43 – 7.31 (m, 6H), 7.28 – 7.22 (m, 2H), 7.20 – 7.14 (m, 1H), 7.09 – 7.02 (m, 2H), 4.38 (dt, *J* = 47.3, 6.2 Hz, 2H), 2.64 (ddd, *J* = 13.4, 10.6, 5.2 Hz, 1H), 2.50 (ddd, *J* = 13.4, 10.4, 6.3 Hz, 1H), 1.90 (dddd, *J* = 13.8, 10.6, 6.3, 4.3 Hz, 1H), 1.71 – 1.56 (m, 4H), 1.47 – 1.22 (m, 6H), 1.12 (q, *J* = 7.8 Hz, 2H), 0.97 (t, *J* = 7.7 Hz, 3H);

<sup>13</sup>C NMR (101 MHz, CDCl<sub>3</sub>) δ 142.7, 135.45, 135.42, 135.40, 134.9, 129.09, 129.07, 128.5, 128.3, 127.74, 127.72, 125.7, 84.2 (d, *J* = 164.1 Hz), 35.9, 32.2, 30.3 (d, *J* = 19.4 Hz), 29.8, 29.1, 25.5 (d, *J* = 5.5 Hz), 22.4, 7.7, 4.3;

FT-IR (thin film) 3024, 2932, 2857, 1455, 1428, 1108, 1010 cm<sup>-1</sup>;

HR-MS (ESI+) *m/z* [M+Na]<sup>+</sup> calcd for C<sub>28</sub>H<sub>35</sub>FNaSi: 441.2390, found: 441.2390;

[α]<sub>D</sub><sup>23</sup> = +8.1 (*c* = 0.70, CHCl<sub>3</sub>); -87% ee from (*S,S*)-L\*.

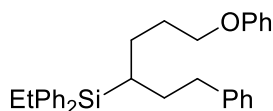

**Ethyl(6-phenoxy-1-phenylhexan-3-yl)diphenylsilane (Table 3, entry 2).** The title compound was synthesized according to the General Procedure from (1-bromo-3-phenylpropyl)(ethyl)diphenylsilane (205 mg, 0.500 mmol) and (3-phenoxypropyl)zinc bromide (0.600 mmol). The product was purified by flash chromatography with silica gel: column #1 (0 → 2% EtOAc in hexanes); column #2 (20 → 40% CH<sub>2</sub>Cl<sub>2</sub> in hexanes). Colorless oil.

(*S,S*)-L\*: 193 mg (83% yield), +87% ee; (*R,R*)-L\*: 182 mg (78% yield), -89% ee.

SFC analysis: The ee was determined via SFC on a CHIRALCEL OD-H column (30% *i*-PrOH in supercritical CO<sub>2</sub>, 3.5 mL/min) with *t<sub>r</sub>* = 3.0 min (major (*S,S*)-L\*), 3.8 min (major (*R,R*)-L\*).

<sup>1</sup>H NMR (400 MHz, CDCl<sub>3</sub>) δ 7.59–7.47 (m, 4H), 7.44–7.32 (m, 6H), 7.31–7.22 (m, 4H), 7.17 (tt, *J* = 7.3, 1.3 Hz, 1H), 7.10–7.03 (m, 2H), 6.94 (tt, *J* = 7.3, 1.0 Hz, 1H), 6.90–6.83 (m, 2H), 3.94–3.81 (m, 2H), 2.66 (ddd, *J* = 13.6, 10.6, 5.2 Hz, 1H), 2.52 (ddd, *J* = 13.6, 10.4, 6.4 Hz, 1H), 2.00–1.49 (m, 6H), 1.41 (tt, *J* = 7.7, 4.4 Hz, 1H), 1.20–1.10 (m, 2H), 0.97 (t, *J* = 7.8 Hz, 3H);

<sup>13</sup>C NMR (101 MHz, CDCl<sub>3</sub>) δ 159.2, 142.8, 135.7, 135.6, 135.5, 135.4, 129.6, 129.4, 129.3, 128.7, 128.5, 128.00, 127.98, 125.9, 120.7, 114.7, 67.9, 35.9, 32.3, 29.2, 26.3, 22.3, 7.9, 4.4;

FT-IR (thin film) 3067, 3024, 2930, 2873, 1600, 1586, 1496, 1469, 1427, 1301, 1244, 1172, 1108, 1080, 1030 cm<sup>-1</sup>;

HR-MS (FAB+) *m/z* [M+H]<sup>+</sup>-H<sub>2</sub> calcd for C<sub>32</sub>H<sub>35</sub>OSi: 463.2457, found: 463.2457;

[α]<sub>D</sub><sup>23</sup> = -0.6 (*c* = 0.60, CHCl<sub>3</sub>); +87% ee from (*S,S*)-L\*.

**Gram-Scale Reaction.** An oven-dried 1020-mL vial was charged with (1-bromo-3-phenylpropyl)(ethyl)diphenylsilane (1.64 g, 4.00 mmol), followed by NiBr<sub>2</sub>·diglyme (123 mg,

0.400 mmol) and then (*S,S*)-L\* (171 mg, 0.520 mmol). Next, an oven-dried stir bar was added, and the reaction vial was capped with a pierceable septum cap and wrapped with electrical tape. The reaction vial was placed under high vacuum on a Schlenk line for 10 min. Next, with the aid of an argon-filled balloon, the vial was placed under an argon atmosphere. Then, anhydrous DMA (8.8 mL; on a gram-scale, the reaction was conducted at a higher concentration) was added, and the reaction mixture was allowed to stir for 15 min, after which it appeared cloudy and orange. Next, (3-phenoxypropyl)zinc bromide (4.80 mmol) was added as a stream over 10–20 seconds, leading to a dark red-black/brown reaction mixture. Vacuum grease was then liberally applied to cover the punctures in the septum cap, the argon balloon was removed, and vacuum grease was applied to cover the puncture. The reaction mixture was then stirred at room temperature at ~800 rpm for 20 h. Next, the reaction mixture was directly transferred to a column of silica gel for purification without any additional workup. The reaction mixture was then purified by flash chromatography with silica gel: column #1 (0 → 2% EtOAc in hexanes); column #2 (20 → 40% CH<sub>2</sub>Cl<sub>2</sub> in hexanes), which provided 1.66 g (89% yield) of a colorless oil (+88% ee).

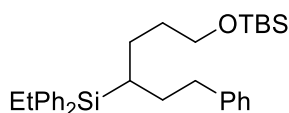

**Tert-butyl((4-(ethyl-diphenylsilyl)-6-phenylhexyl)oxy)dimethylsilane (Table 3, entry 3).**

The title compound was synthesized according to the General Procedure from (1-bromo-3-phenylpropyl)(ethyl)diphenylsilane (205 mg, 0.500 mmol) and (3-((*tert*-butyldimethylsilyl)oxy)propyl)zinc bromide (0.600 mmol). The product was purified by flash chromatography (0 → 20% CH<sub>2</sub>Cl<sub>2</sub> in hexanes). Colorless oil.

(*S,S*)-L\*: 164 mg (65% yield), –87% ee; (*R,R*)-L\*: 182 mg (73% yield), +88% ee.

SFC analysis: The ee was determined via SFC on a CHIRALCEL OJ column (10% *i*-PrOH in supercritical CO<sub>2</sub>, 3.5 mL/min) with *t<sub>r</sub>* = 3.4 min (major (*S,S*)-L\*), 2.3 min (major (*R,R*)-L\*).

<sup>1</sup>H NMR (400 MHz, CDCl<sub>3</sub>) δ 7.57–7.45 (m, 4H), 7.41–7.30 (m, 6H), 7.27–7.21 (m, 2H), 7.20–7.13 (m, 1H), 7.08–7.02 (m, 2H), 3.54 (t, *J* = 6.0 Hz, 2H), 2.64 (ddd, *J* = 13.3, 10.8, 5.1 Hz, 1H), 2.49 (13.3, 10.5, 6.4 Hz, 1H), 1.89 (dddd, *J* = 14.0, 10.7, 6.4, 4.3 Hz, 1H), 1.76–1.56 (m, 3H), 1.53–1.39 (m, 2H), 1.39–1.31 (m, 1H), 1.12 (q, *J* = 7.8 Hz, 2H), 0.96 (t, *J* = 7.8 Hz, 3H), 0.88 (s, 9H), 0.02 (s, 6H);

<sup>13</sup>C NMR (101 MHz, CDCl<sub>3</sub>) δ 143.0, 135.70, 135.68, 135.64, 135.60, 129.3, 129.2, 128.7, 128.5, 127.94, 127.93, 125.8, 63.6, 36.0, 33.0, 32.4, 26.23, 26.22, 22.5, 18.6, 7.9, 4.5, –5.00, –5.02;

FT-IR (thin film) 3068, 3025, 2953, 2929, 2856, 1462, 1427, 1386, 1255, 1107, 1008, 953, 836 cm<sup>-1</sup>;

HR-MS (ESI+) *m/z* [M+Na]<sup>+</sup> calcd for C<sub>32</sub>H<sub>46</sub>NaOSi<sub>2</sub>: 525.2985, found: 525.2969;

[α]<sup>23</sup><sub>D</sub> = +7.2 (*c* = 0.76, CHCl<sub>3</sub>); –87% ee from (*S,S*)-L\*.

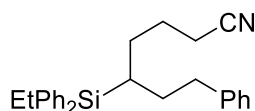

**5-(Ethyldiphenylsilyl)-7-phenylheptanenitrile (Table 3, entry 4).** The title compound was synthesized according to the General Procedure from (1-bromo-3-phenylpropyl)(ethyl)diphenylsilane (205 mg, 0.500 mmol) and (3-cyanopropyl)zinc bromide (0.600 mmol). The product was purified by flash chromatography (3 → 5% EtOAc in hexanes). Colorless oil.

(*S,S*)-L\*: 108 mg (54% yield), +88% ee; (*R,R*)-L\*: 93 mg (47% yield), -86% ee.

SFC analysis: The ee was determined via SFC on a CHIRALCEL OJ column (45% MeOH in supercritical CO<sub>2</sub>, 3.5 mL/min) with *t<sub>r</sub>* = 7.2 min (major (*S,S*)-L\*), 19.7 min (major (*R,R*)-L\*).

<sup>1</sup>H NMR (400 MHz, CDCl<sub>3</sub>) δ 7.58–7.45 (m, 4H), 7.45–7.31 (m, 6H), 7.29–7.23 (m, 2H), 7.22–7.14 (m, 1H), 7.11–7.02 (m, 2H), 2.63 (ddd, *J* = 13.7, 10.1, 5.4 Hz, 1H), 2.51 (ddd, *J* = 13.7, 10.1, 6.6 Hz, 1H), 2.28–2.12 (m, 2H), 1.93 (dddd, *J* = 14.2, 10.6, 6.6, 4.4 Hz, 1H), 1.80–1.71 (m, 1H), 1.70–1.58 (m, 2H), 1.58–1.47 (m, 2H), 1.38–1.28 (m, 1H), 1.13 (q, *J* = 7.8 Hz, 2H), 0.97 (t, *J* = 7.7 Hz, 3H);

<sup>13</sup>C NMR (101 MHz, CDCl<sub>3</sub>) δ 142.4, 135.56, 135.53, 134.95, 134.93, 129.57, 129.55, 128.7, 128.6, 128.14, 128.11, 126.1, 119.9, 35.8, 32.0, 29.5, 25.4, 22.3, 17.6, 7.9, 4.3;

FT-IR (thin film) 3067, 3024, 2931, 2873, 2244, 1454, 1427, 1108, 1010 cm<sup>-1</sup>;

HR-MS (FAB+) *m/z* [M+H]<sup>+</sup>-H<sub>2</sub> calcd for C<sub>27</sub>H<sub>30</sub>NSi: 396.2148, found: 396.2142;

[α]<sub>D</sub><sup>23</sup> = +10.6 (*c* = 0.48, CHCl<sub>3</sub>); +88% ee from (*S,S*)-L\*.

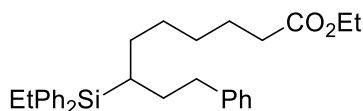

**Ethyl 7-(ethyldiphenylsilyl)-9-phenylnonanoate (Table 3, entry 5).** The title compound was synthesized according to the General Procedure from (1-bromo-3-phenylpropyl)(ethyl)diphenylsilane (205 mg, 0.500 mmol) and (6-ethoxy-6-oxohexyl)zinc bromide (0.600 mmol). The product was purified by flash chromatography with silica gel: column #1 (0 → 5% EtOAc in hexanes); column #2 (30 → 60% CH<sub>2</sub>Cl<sub>2</sub> in hexanes). Colorless oil.

(*S,S*)-L\*: 142 mg (60% yield), -88% ee; (*R,R*)-L\*: 136 mg (58% yield), +86% ee.

SFC analysis: The ee was determined via SFC on a CHIRALCEL OJ column (20% *i*-PrOH in supercritical CO<sub>2</sub>, 3.5 mL/min) with *t<sub>r</sub>* = 13.9 min (major (*S,S*)-L\*), 9.5 min (major (*R,R*)-L\*).

<sup>1</sup>H NMR (400 MHz, CDCl<sub>3</sub>) δ 7.54 – 7.46 (m, 4H), 7.41 – 7.30 (m, 6H), 7.27 – 7.22 (m, 2H), 7.20 – 7.13 (m, 1H), 7.08 – 7.03 (m, 2H), 4.12 (q, *J* = 7.1 Hz, 2H), 2.62 (ddd, *J* = 13.4, 10.6, 5.1 Hz, 1H), 2.48 (ddd, *J* = 13.5, 10.4, 6.3 Hz, 1H), 2.23 (t, *J* = 7.6 Hz, 2H), 1.88 (dddd, *J* = 13.7, 10.5, 6.3, 4.2 Hz, 1H), 1.67 – 1.51 (m, 4H), 1.44 – 1.19 (m, 9H), 1.11 (q, *J* = 7.4 Hz, 2H), 0.95 (t, *J* = 7.7 Hz, 3H);

<sup>13</sup>C NMR (101 MHz, CDCl<sub>3</sub>) δ 174.0, 142.8, 135.6, 135.54, 135.52, 129.19, 129.16, 128.6, 128.4, 127.84, 127.82, 125.8, 60.3, 36.0, 34.5, 32.3, 29.9, 29.6, 29.3, 25.0, 22.6, 14.4, 7.8, 4.4;

FT-IR (thin film) 3068, 3024, 2930, 2856, 1735, 1454, 1427, 1373, 1180, 1108, 1030  $\text{cm}^{-1}$ ;  
HR-MS (FAB+)  $m/z$   $[M+H]^+-H_2$  calcd for  $C_{31}H_{39}O_2Si$ : 471.2719, found: 471.2732;  
 $[\alpha]^{23}_D = +4.5$  ( $c = 0.52$ ,  $CHCl_3$ ); -88% ee from (*S,S*)-**L**\*.

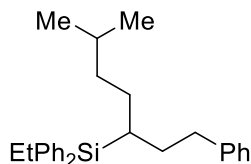

**Ethyl(6-methyl-1-phenylheptan-3-yl)diphenylsilane (Table 3, entry 6).** The title compound was synthesized according to the General Procedure from (1-bromo-3-phenylpropyl)(ethyl)diphenylsilane (205 mg, 0.500 mmol) and isopentylzinc bromide (0.600 mmol). The product was purified by flash chromatography (0  $\rightarrow$  5%  $CH_2Cl_2$  in hexanes). Colorless oil.

(*S,S*)-**L**\*: 129 mg (65% yield), +91% ee; (*R,R*)-**L**\*: 132 mg (66% yield), -91% ee.

SFC analysis: The ee was determined via SFC on a CHIRALCEL OJ column (15% *i*-PrOH in supercritical  $CO_2$ , 3.5 mL/min) with  $t_r = 3.5$  min (major (*S,S*)-**L**\*), 5.1 min (major (*R,R*)-**L**\*).

$^1H$  NMR (400 MHz,  $CDCl_3$ )  $\delta$  7.56–7.45 (m, 4H), 7.41–7.30 (m, 6H), 7.27–7.21 (m, 2H), 7.16 (tt,  $J = 7.3, 1.3$  Hz, 1H), 7.09–7.03 (m, 2H), 2.63 (ddd,  $J = 13.5, 10.7, 5.0$  Hz, 1H), 2.48 (ddd,  $J = 13.5, 10.5, 6.3$  Hz, 1H), 1.88 (dddd,  $J = 14.0, 10.6, 6.4, 4.3$  Hz, 1H), 1.71–1.56 (m, 2H), 1.50–1.33 (m, 2H), 1.33–1.20 (m, 2H), 1.19–1.06 (m, 3H), 0.96 (t,  $J = 7.8$  Hz, 3H), 0.81 (t,  $J = 6.6$  Hz, 6H);

$^{13}C$  NMR (101 MHz,  $CDCl_3$ )  $\delta$  143.0, 135.85, 135.76, 135.7, 135.6, 129.24, 129.22, 128.7, 128.4, 127.90, 127.89, 125.8, 39.1, 36.1, 32.5, 28.6, 27.7, 23.0, 22.9, 22.7, 8.0, 4.5;

FT-IR (thin film) 3068, 3025, 2953, 2925, 2872, 1496, 1458, 1427, 1108, 1010  $\text{cm}^{-1}$ ;

HR-MS (ESI+)  $m/z$   $[M+H]^+-H_2$  calcd for  $C_{28}H_{35}Si$ : 399.2508, found: 399.2499;

$[\alpha]^{23}_D = +10.6$  ( $c = 0.60$ ,  $CHCl_3$ ); +91% ee from (*S,S*)-**L**\*.



#### IV. Mechanistic Experiments

(1-Bromo-3-phenylpropyl)(ethyl)diphenylsilane was separated via preparative-scale SFC on a CHIRALPAK AD-H column (2% *i*-PrOH, 4.0 mL/min) with  $t_r$  = 3.9 min, 5.0 min.

**Procedure.** In a glovebox, an oven-dried 4-mL vial was charged with *rac*-, (+)-, or (-)-(1-bromo-3-phenylpropyl)(ethyl)diphenylsilane (29 mg, 0.070 mmol), followed by NiBr<sub>2</sub>·diglyme (2.5 mg, 0.0070 mmol) and then L\* (3.0 mg, 0.0091 mmol). Next, an oven-dried stir bar was added, followed by anhydrous DMA (0.3 mL). The reaction mixture was stirred for 10 min, and then (2-(1,3-dioxolan-2-yl)ethyl)zinc bromide (0.084 mmol) was added, and the vial was capped and removed from the glovebox. The vial cap was wrapped with electrical tape, and the mixture was allowed to stir at room temperature for 30 min. After 30 min, EtOH (0.20 mL) was added, and the mixture was allowed to stir for 10 min. Next, tetradecane (internal standard for GC analysis; 20  $\mu$ L), hexanes (0.50 mL), and Et<sub>2</sub>O (2.0 mL) were added. The mixture was then passed through a short plug of silica gel into a test tube, flushing with Et<sub>2</sub>O. An aliquot of the filtrate was removed for GC analysis. The remaining filtrate was concentrated, and H<sub>2</sub>O (~2 mL) and 1:1 hexanes/Et<sub>2</sub>O (~1 mL) were added. The test tube was capped and thoroughly shaken. The organic layer was extracted and placed on a preparative TLC plate to separate the remaining electrophile from the product (eluent 50:1 hexanes/Et<sub>2</sub>O; electrophile:  $R_f$  ~ 0.6; product:  $R_f$  ~ 0.2).

SFC analysis of remaining electrophile: The ee was determined via SFC on a CHIRALCEL OJ column (3% *i*-PrOH in supercritical CO<sub>2</sub>, 3.5 mL/min) with  $t_r$  = 4.6 min, 5.6 min.

SFC analysis of product: The ee was determined via SFC on a CHIRALCEL OJ column (35% *i*-PrOH in supercritical CO<sub>2</sub>, 3.5 mL/min) with  $t_r$  = 6.8 min (major (*S,S*)-L\*), 4.4 min (minor (*S,S*)-L\*).

## V. Determination of Absolute Stereochemistry

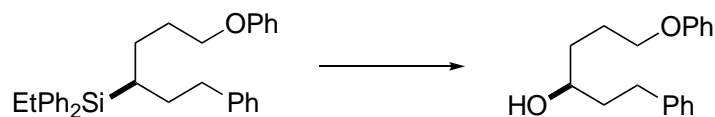

**Table 3, entry 2:** The absolute configuration of (*R*)-ethyl(6-phenoxy-1-phenylhexan-3-yl)diphenylsilane ((*R,R*)-**L\***) was determined after an enantiospecific Fleming-Tamao oxidation<sup>13</sup> to yield (*R*)-6-phenoxy-1-phenylhexan-3-ol. The absolute configuration of this molecule has previously been determined by single crystal x-ray diffraction.<sup>14</sup> Comparison of HPLC data established the absolute configuration illustrated above.

HPLC analysis: The ee was determined via HPLC on a CHIRALPAK AS-H column (3% *i*-PrOH in hexanes, 1.0 mL/min) with  $t_r$  = 19.5 min (major (*S,S*)-**L\***), 14.4 min (major (*R,R*)-**L\***).

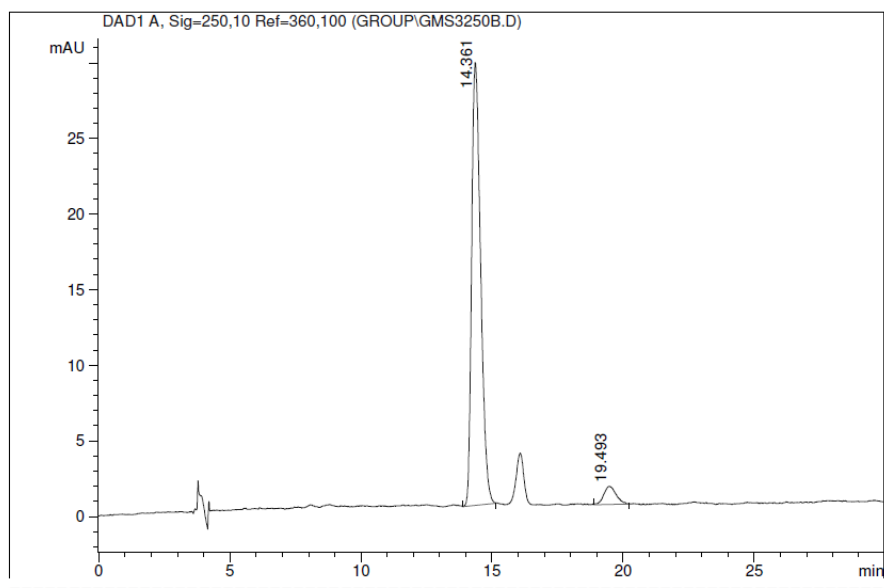

Signal 1: DAD1 A, Sig=250,10 Ref=360,100

| Peak # | RT [min] | Width [min] | Area    | Area % |
|--------|----------|-------------|---------|--------|
| 1      | 14.361   | 0.396       | 696.396 | 94.715 |
| 2      | 19.493   | 0.543       | 38.859  | 5.285  |

**Table 2, entry 2:** Single crystals of (*S*)-(4-(1,3-dioxolan-2-yl)-1-phenylbutan-2-yl)(ethyl)diphenylsilane ((*S,S*)-**L\***) were obtained after slow evaporation from Et<sub>2</sub>O. The crystal

(13) Suginome, M.; Iwanami, T.; Ohmori, Y.; Matsumoto, A.; Ito, Y. *Chem. Eur. J.* **2005**, *11*, 2954–2965.

(14) Schmidt, J.; Choi, J.; Liu, A. T.; Slusarczyk, M.; Fu, G. C. *Science* **2016**, *354*, 1265–1269.

was kept at 99.95 K during data collection. Using Olex2,<sup>15</sup> the structure was solved with the XT<sup>16</sup> structure solution program using intrinsic phasing and refined with the ShelXL<sup>17</sup> refinement package using least squares minimization.

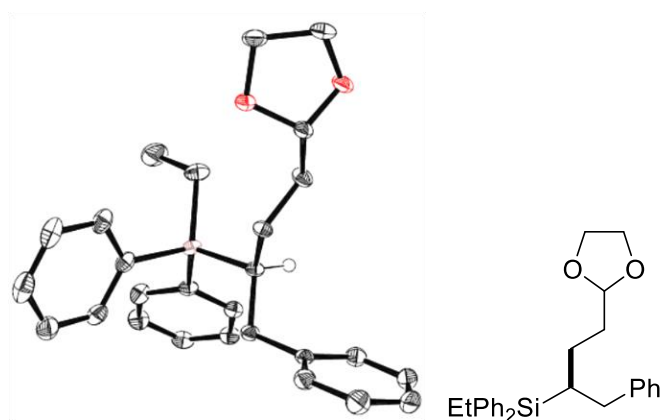

**Table S1.** Crystal data and structure refinement for (S)-4-(1,3-dioxolan-2-yl)-1-phenylbutan-2-yl(ethyl)diphenylsilane.

|                                    |                                                                   |
|------------------------------------|-------------------------------------------------------------------|
| Identification code                | (S)-4-(1,3-dioxolan-2-yl)-1-phenylbutan-2-yl(ethyl)diphenylsilane |
| Empirical formula                  | C <sub>27</sub> H <sub>32</sub> O <sub>2</sub> Si                 |
| Formula weight                     | 416.61                                                            |
| Temperature/K                      | 99.95                                                             |
| Crystal system                     | orthorhombic                                                      |
| Space group                        | P2 <sub>1</sub> 2 <sub>1</sub> 2 <sub>1</sub>                     |
| a/Å                                | 10.5454(9)                                                        |
| b/Å                                | 12.0533(11)                                                       |
| c/Å                                | 18.5574(17)                                                       |
| α/°                                | 90                                                                |
| β/°                                | 90                                                                |
| γ/°                                | 90                                                                |
| Volume/Å <sup>3</sup>              | 2358.8(4)                                                         |
| Z                                  | 4                                                                 |
| ρ <sub>calc</sub> /cm <sup>3</sup> | 1.173                                                             |

(15) Dolomanov, O. V.; Bourhis, L. J.; Gildea, R. J.; Howard, J. A. K.; Puschmann, H. *J. Appl. Crystallogr.* **2009**, *42*, 339–341.

(16) Sheldrick, G. M. *Acta Cryst.* **2015**, *A71*, 3–8.

(17) Sheldrick, G. M. *Acta Cryst.* **2015**, *C71*, 3–8.

|                                                |                                                               |
|------------------------------------------------|---------------------------------------------------------------|
| $\mu/\text{mm}^{-1}$                           | 0.120                                                         |
| F(000)                                         | 896.0                                                         |
| Crystal size/ $\text{mm}^3$                    | $0.27 \times 0.23 \times 0.18$                                |
| Radiation                                      | MoK $\alpha$ ( $\lambda = 0.71073$ )                          |
| $2\Theta$ range for data collection/           | 4.442 to 55.002                                               |
| Index ranges                                   | $-13 \leq h \leq 13, -15 \leq k \leq 15, -24 \leq l \leq 24$  |
| Reflections collected                          | 111480                                                        |
| Independent reflections                        | 5412 [ $R_{\text{int}} = 0.0467, R_{\text{sigma}} = 0.0137$ ] |
| Data/restraints/parameters                     | 5412/0/272                                                    |
| Goodness-of-fit on $F^2$                       | 1.038                                                         |
| Final R indexes [ $I \geq 2\sigma(I)$ ]        | $R_1 = 0.0316, wR_2 = 0.0845$                                 |
| Final R indexes [all data]                     | $R_1 = 0.0330, wR_2 = 0.0852$                                 |
| Largest diff. peak/hole / $e \text{ \AA}^{-3}$ | 0.46/-0.28                                                    |
| Flack parameter                                | 0.018(12)                                                     |

**Table S2.** Fractional atomic coordinates ( $\times 10^4$ ) and equivalent isotropic displacement parameters ( $\text{\AA}^2 \times 10^3$ ) for (S)-(4-(1,3-dioxolan-2-yl)-1-phenylbutan-2-yl)(ethyl)diphenylsilane.  $U_{\text{eq}}$  is defined as 1/3 of the trace of the orthogonalised  $U_{ij}$  tensor.

| Atom | <i>x</i>    | <i>y</i>   | <i>z</i>   | U(eq)     |
|------|-------------|------------|------------|-----------|
| Si01 | 6941.8(4)   | 874.1(4)   | 6709.4(3)  | 17.18(12) |
| O002 | 2430.2(12)  | 2989.1(13) | 5609.7(8)  | 23.9(3)   |
| O003 | 2811.4(12)  | 2372.1(14) | 6747.5(8)  | 28.2(3)   |
| C004 | 8442.3(18)  | 175.9(15)  | 6410.0(11) | 18.3(4)   |
| C005 | 10176.5(19) | -53.2(18)  | 5557.1(11) | 22.9(4)   |
| C006 | 9083.7(18)  | 495.2(16)  | 5785.6(11) | 20.1(4)   |
| C007 | 6863.4(16)  | 2354.5(14) | 6376.8(9)  | 16.0(3)   |
| C008 | 3278.3(16)  | 3093.8(17) | 6196.7(10) | 19.1(4)   |
| C009 | 8028.1(16)  | 4213.3(15) | 6387(1)    | 18.7(3)   |
| C00A | 8238.1(18)  | 4379.8(17) | 5651.3(11) | 23.0(4)   |
| C00B | 7956.2(17)  | 3052.1(14) | 6694.5(10) | 18.2(3)   |
| C00C | 5568.1(16)  | 2884.7(16) | 6565.2(10) | 17.1(4)   |
| C00D | 4590.6(17)  | 2750.8(18) | 5967.3(11) | 21.4(4)   |
| C00E | 1220.8(18)  | 2897(2)    | 5947.1(12) | 26.1(4)   |
| C00F | 8931.4(19)  | -729.8(17) | 6793.5(12) | 25.0(4)   |
| C00G | 8064(2)     | 985.1(16)  | 8121.2(11) | 25.2(4)   |
| C00H | 8295.2(19)  | 5445.9(19) | 5367.0(12) | 28.1(4)   |

|      |             |             |            |         |
|------|-------------|-------------|------------|---------|
| C00I | 10635.8(18) | -945.3(18)  | 5946.2(11) | 24.6(4) |
| C00J | 6937.4(18)  | 920.2(15)   | 7722.4(10) | 20.9(4) |
| C00K | 5793(2)     | 970.4(18)   | 8106.0(11) | 26.2(4) |
| C00L | 10010(2)    | -1293.9(18) | 6561.9(12) | 27.3(5) |
| C00M | 7903(2)     | 6208.7(17)  | 6538.7(12) | 30.5(5) |
| C00N | 1496.9(19)  | 2189(2)     | 6607.0(12) | 28.6(5) |
| C00O | 7863.2(19)  | 5140.6(16)  | 6824.8(11) | 23.9(4) |
| C00P | 8129(2)     | 6360.0(18)  | 5809.3(13) | 31.2(5) |
| C00Q | 8053(3)     | 1094.3(18)  | 8867.7(12) | 32.3(5) |
| C00R | 5546(2)     | 62.5(18)    | 6356.3(13) | 27.8(5) |
| C00S | 6905(3)     | 1139.6(18)  | 9231.5(12) | 35.3(5) |
| C00T | 5775(2)     | 1080.0(19)  | 8852.8(13) | 32.9(5) |
| C00U | 5590(3)     | -1169(2)    | 6518.8(16) | 41.1(6) |

**Table S3.** Anisotropic displacement parameters ( $\text{\AA}^2 \times 10^3$ ) for (*S*)-(4-(1,3-dioxolan-2-yl)-1-phenylbutan-2-yl)(ethyl)diphenylsilane.. The anisotropic displacement factor exponent takes the form:  $-2\pi^2[h^2a^{*2}U_{11}+2hka^*b^*U_{12}+\dots]$ .

| Atom | U <sub>11</sub> | U <sub>22</sub> | U <sub>33</sub> | U <sub>23</sub> | U <sub>13</sub> | U <sub>12</sub> |
|------|-----------------|-----------------|-----------------|-----------------|-----------------|-----------------|
| Si01 | 13.3(2)         | 14.1(2)         | 24.1(2)         | -1.95(19)       | 2.36(19)        | -0.82(19)       |
| O002 | 13.1(6)         | 36.1(8)         | 22.6(7)         | 2.7(6)          | -3.7(5)         | 0.9(6)          |
| O003 | 14.4(6)         | 43.8(9)         | 26.4(7)         | 10.4(7)         | -2.6(5)         | -5.2(6)         |
| C004 | 16.3(8)         | 14.3(8)         | 24.2(9)         | -4.3(7)         | 0.0(7)          | -1.1(6)         |
| C005 | 20.1(9)         | 25.8(10)        | 22.7(10)        | -4.9(8)         | 3.2(7)          | 0.4(8)          |
| C006 | 18.9(8)         | 17.5(9)         | 23.9(10)        | -2.1(7)         | -1.7(7)         | 0.9(7)          |
| C007 | 11.7(7)         | 16.9(8)         | 19.6(8)         | -1.6(7)         | -0.1(7)         | 0.9(6)          |
| C008 | 13.8(8)         | 23.4(9)         | 20.2(9)         | 0.8(7)          | -1.3(7)         | 1.0(7)          |
| C009 | 12.2(7)         | 18.4(8)         | 25.6(9)         | 2.2(7)          | -4.0(7)         | -1.2(7)         |
| C00A | 18.5(8)         | 24.8(10)        | 25.6(9)         | -0.8(8)         | 0.0(7)          | 0.9(7)          |
| C00B | 13.7(7)         | 16.7(8)         | 24.2(9)         | 1.6(7)          | -3.1(8)         | 0.3(6)          |
| C00C | 12.7(7)         | 19.1(9)         | 19.4(9)         | -1.6(7)         | -0.8(6)         | 2.5(7)          |
| C00D | 15.0(8)         | 30.1(11)        | 19.1(9)         | -1.3(8)         | -0.9(7)         | 4.8(7)          |
| C00E | 12.6(8)         | 31.7(11)        | 34.0(11)        | -3.2(9)         | -2.7(8)         | -0.6(8)         |
| C00F | 24.8(9)         | 21.3(10)        | 28.9(10)        | 1.4(9)          | 5.2(8)          | 3.3(8)          |
| C00G | 28.7(9)         | 18.1(9)         | 28.9(10)        | 1.5(8)          | 3.2(8)          | -5.3(8)         |
| C00H | 21.9(10)        | 33.1(11)        | 29.4(10)        | 9.1(9)          | -1.6(8)         | -2.2(8)         |
| C00I | 18.8(8)         | 24.4(10)        | 30.7(10)        | -7.9(9)         | 0.3(7)          | 3.3(8)          |

|      |          |          |          |         |          |           |
|------|----------|----------|----------|---------|----------|-----------|
| C00J | 24.7(8)  | 12.6(7)  | 25.5(9)  | 1.1(7)  | 4.3(8)   | -0.5(8)   |
| C00K | 28.4(10) | 20.1(10) | 30.1(11) | 6.0(8)  | 8.0(8)   | 4.3(8)    |
| C00L | 24.8(10) | 21.2(10) | 35.8(12) | 0.5(9)  | -1.2(8)  | 7.4(8)    |
| C00M | 35.4(11) | 18.6(9)  | 37.6(12) | -1.6(8) | -5.6(10) | -0.1(8)   |
| C00N | 18.4(9)  | 41.5(12) | 25.9(11) | -1.8(9) | -2.3(8)  | -10.1(8)  |
| C00O | 24.8(9)  | 20.8(9)  | 26.2(10) | -0.5(8) | -3.5(8)  | -1.5(8)   |
| C00P | 29.7(10) | 22.0(9)  | 41.8(12) | 10.6(9) | -6.4(10) | -3.8(9)   |
| C00Q | 43.7(12) | 23.9(11) | 29.1(10) | 1.3(8)  | -4(1)    | -10.1(10) |
| C00R | 22.7(10) | 24.3(11) | 36.5(12) | -6.1(9) | -0.2(9)  | -6.2(8)   |
| C00S | 58.5(15) | 22.5(10) | 24.9(10) | -0.1(8) | 9.1(11)  | -3.5(10)  |
| C00T | 44.7(13) | 23.6(12) | 30.4(11) | 5.5(9)  | 15.4(10) | 5.6(9)    |
| C00U | 42.9(14) | 25.3(12) | 55.1(16) | 1.7(11) | -5.9(12) | -10.6(10) |

**Table S4.** Bond lengths for (S)-(4-(1,3-dioxolan-2-yl)-1-phenylbutan-2-yl)(ethyl)diphenylsilane.

| <b>Atom</b> | <b>Atom</b> | <b>Length/Å</b> | <b>Atom</b> | <b>Atom</b> | <b>Length/Å</b> |
|-------------|-------------|-----------------|-------------|-------------|-----------------|
| Si01        | C004        | 1.8763(19)      | C009        | C00O        | 1.393(3)        |
| Si01        | C007        | 1.8899(18)      | C00A        | C00H        | 1.390(3)        |
| Si01        | C00J        | 1.8806(19)      | C00C        | C00D        | 1.523(3)        |
| Si01        | C00R        | 1.885(2)        | C00E        | C00N        | 1.521(3)        |
| O002        | C008        | 1.415(2)        | C00F        | C00L        | 1.393(3)        |
| O002        | C00E        | 1.425(2)        | C00G        | C00J        | 1.402(3)        |
| O003        | C008        | 1.430(2)        | C00G        | C00Q        | 1.392(3)        |
| O003        | C00N        | 1.428(2)        | C00H        | C00P        | 1.385(3)        |
| C004        | C006        | 1.396(3)        | C00I        | C00L        | 1.385(3)        |
| C004        | C00F        | 1.402(3)        | C00J        | C00K        | 1.403(3)        |
| C005        | C006        | 1.395(3)        | C00K        | C00T        | 1.392(3)        |
| C005        | C00I        | 1.383(3)        | C00M        | C00O        | 1.393(3)        |
| C007        | C00B        | 1.544(2)        | C00M        | C00P        | 1.386(3)        |
| C007        | C00C        | 1.548(2)        | C00Q        | C00S        | 1.388(4)        |
| C008        | C00D        | 1.506(2)        | C00R        | C00U        | 1.515(3)        |
| C009        | C00A        | 1.397(3)        | C00S        | C00T        | 1.385(4)        |
| C009        | C00B        | 1.513(2)        |             |             |                 |

**Table S5.** Bond angles for (S)-(4-(1,3-dioxolan-2-yl)-1-phenylbutan-2-yl)(ethyl)diphenylsilane.

| Atom | Atom | Atom | Angle/°    | Atom | Atom | Atom | Angle/°    |
|------|------|------|------------|------|------|------|------------|
| C004 | Si01 | C007 | 111.32(8)  | C00H | C00A | C009 | 120.68(19) |
| C004 | Si01 | C00J | 108.14(9)  | C009 | C00B | C007 | 113.40(14) |
| C004 | Si01 | C00R | 108.83(9)  | C00D | C00C | C007 | 112.89(15) |
| C00J | Si01 | C007 | 107.36(8)  | C008 | C00D | C00C | 112.76(16) |
| C00J | Si01 | C00R | 111.16(10) | O002 | C00E | C00N | 103.08(15) |
| C00R | Si01 | C007 | 110.02(9)  | C00L | C00F | C004 | 121.60(19) |
| C008 | O002 | C00E | 103.55(14) | C00Q | C00G | C00J | 121.6(2)   |
| C00N | O003 | C008 | 107.34(15) | C00P | C00H | C00A | 120.3(2)   |
| C006 | C004 | Si01 | 122.06(15) | C005 | C00I | C00L | 120.00(18) |
| C006 | C004 | C00F | 117.25(18) | C00G | C00J | Si01 | 121.81(15) |
| C00F | C004 | Si01 | 120.62(15) | C00G | C00J | C00K | 117.33(17) |
| C00I | C005 | C006 | 119.95(19) | C00K | C00J | Si01 | 120.71(15) |
| C005 | C006 | C004 | 121.48(19) | C00T | C00K | C00J | 121.4(2)   |
| C00B | C007 | Si01 | 110.91(12) | C00I | C00L | C00F | 119.7(2)   |
| C00B | C007 | C00C | 110.34(14) | C00P | C00M | C00O | 119.9(2)   |
| C00C | C007 | Si01 | 110.77(12) | O003 | C00N | C00E | 104.25(16) |
| O002 | C008 | O003 | 106.16(15) | C009 | C00O | C00M | 121.02(19) |
| O002 | C008 | C00D | 109.80(15) | C00H | C00P | C00M | 119.72(19) |
| O003 | C008 | C00D | 110.59(16) | C00S | C00Q | C00G | 119.7(2)   |
| C00A | C009 | C00B | 120.60(17) | C00U | C00R | Si01 | 114.53(17) |
| C00O | C009 | C00A | 118.33(18) | C00T | C00S | C00Q | 120.1(2)   |
| C00O | C009 | C00B | 121.06(17) | C00S | C00T | C00K | 119.9(2)   |

**Table S6.** Torsion angles for (S)-(4-(1,3-dioxolan-2-yl)-1-phenylbutan-2-yl)(ethyl)diphenylsilane.

| A    | B    | C    | D    | Angle/°     | A    | B    | C    | D    | Angle/°     |
|------|------|------|------|-------------|------|------|------|------|-------------|
| Si01 | C004 | C006 | C005 | -177.98(15) | C00B | C009 | C00O | C00M | -178.64(19) |
| Si01 | C004 | C00F | C00L | 176.90(17)  | C00C | C007 | C00B | C009 | -63.0(2)    |
| Si01 | C007 | C00B | C009 | 173.86(12)  | C00E | O002 | C008 | O003 | 38.07(19)   |
| Si01 | C007 | C00C | C00D | -91.97(17)  | C00E | O002 | C008 | C00D | 157.63(17)  |
| Si01 | C00J | C00K | C00T | -175.63(17) | C00F | C004 | C006 | C005 | -0.9(3)     |
| O002 | C008 | C00D | C00C | 177.77(16)  | C00G | C00J | C00K | C00T | 0.0(3)      |
| O002 | C00E | C00N | O003 | 24.9(2)     | C00G | C00Q | C00S | C00T | -0.2(3)     |

|      |      |      |      |             |      |      |      |      |             |
|------|------|------|------|-------------|------|------|------|------|-------------|
| O003 | C008 | C00D | C00C | -65.4(2)    | C00I | C005 | C006 | C004 | 1.0(3)      |
| C004 | Si01 | C007 | C00B | -62.49(14)  | C00J | Si01 | C004 | C006 | -144.74(16) |
| C004 | Si01 | C007 | C00C | 174.63(12)  | C00J | Si01 | C004 | C00F | 38.25(18)   |
| C004 | Si01 | C00J | C00G | 30.26(18)   | C00J | Si01 | C007 | C00B | 55.69(14)   |
| C004 | Si01 | C00J | C00K | -154.32(16) | C00J | Si01 | C007 | C00C | -67.19(14)  |
| C004 | Si01 | C00R | C00U | 51.1(2)     | C00J | Si01 | C00R | C00U | -67.9(2)    |
| C004 | C00F | C00L | C00I | 1.3(3)      | C00J | C00G | C00Q | C00S | 0.1(3)      |
| C005 | C00I | C00L | C00F | -1.2(3)     | C00J | C00K | C00T | C00S | -0.1(3)     |
| C006 | C004 | C00F | C00L | -0.2(3)     | C00N | O003 | C008 | O002 | -21.9(2)    |
| C006 | C005 | C00I | C00L | 0.1(3)      | C00N | O003 | C008 | C00D | -140.90(17) |
| C007 | Si01 | C004 | C006 | -27.02(18)  | C00O | C009 | C00A | C00H | 0.7(3)      |
| C007 | Si01 | C004 | C00F | 155.97(16)  | C00O | C009 | C00B | C007 | 117.41(19)  |
| C007 | Si01 | C00J | C00G | -89.97(17)  | C00O | C00M | C00P | C00H | 1.0(3)      |
| C007 | Si01 | C00J | C00K | 85.45(17)   | C00P | C00M | C00O | C009 | -1.0(3)     |
| C007 | Si01 | C00R | C00U | 173.35(18)  | C00Q | C00G | C00J | Si01 | 175.60(16)  |
| C007 | C00C | C00D | C008 | 170.42(16)  | C00Q | C00G | C00J | C00K | 0.0(3)      |
| C008 | O002 | C00E | C00N | -38.2(2)    | C00Q | C00S | C00T | C00K | 0.2(3)      |
| C008 | O003 | C00N | C00E | -2.1(2)     | C00R | Si01 | C004 | C006 | 94.40(18)   |
| C009 | C00A | C00H | C00P | -0.8(3)     | C00R | Si01 | C004 | C00F | -82.61(18)  |
| C00A | C009 | C00B | C007 | -61.3(2)    | C00R | Si01 | C007 | C00B | 176.78(13)  |
| C00A | C009 | C00O | C00M | 0.1(3)      | C00R | Si01 | C007 | C00C | 53.90(15)   |
| C00A | C00H | C00P | C00M | -0.1(3)     | C00R | Si01 | C00J | C00G | 149.66(16)  |
| C00B | C007 | C00C | C00D | 144.82(16)  | C00R | Si01 | C00J | C00K | -34.92(19)  |
| C00B | C009 | C00A | C00H | 179.53(17)  |      |      |      |      |             |

**Table S7.** Hydrogen atom coordinates ( $\text{\AA}\times 10^4$ ) and isotropic displacement parameters ( $\text{\AA}^2\times 10^3$ ) for (S)-4-(1,3-dioxolan-2-yl)-1-phenylbutan-2-yl(ethyl)diphenylsilane.

| Atom | <i>x</i> | <i>y</i> | <i>z</i> | U(eq) |
|------|----------|----------|----------|-------|
| H005 | 10605    | 186      | 5134     | 27    |
| H006 | 8769     | 1100     | 5510     | 24    |
| H007 | 6955     | 2348     | 5840     | 19    |
| H008 | 3288     | 3877     | 6374     | 23    |
| H00A | 8343     | 3758     | 5342     | 28    |
| H00B | 7846     | 3102     | 7223     | 22    |
| H00C | 8769     | 2667     | 6601     | 22    |
| H00D | 5237     | 2539     | 7011     | 20    |



|      |       |       |      |    |
|------|-------|-------|------|----|
| H00E | 5693  | 3685  | 6662 | 20 |
| H00F | 4851  | 3204  | 5548 | 26 |
| H00G | 4572  | 1965  | 5813 | 26 |
| H00H | 601   | 2529  | 5625 | 31 |
| H00I | 889   | 3635  | 6087 | 31 |
| H00J | 8517  | -965  | 7222 | 30 |
| H00K | 8854  | 954   | 7876 | 30 |
| H00L | 8449  | 5548  | 4867 | 34 |
| H00M | 11381 | -1319 | 5791 | 30 |
| H00N | 5013  | 929   | 7851 | 31 |
| H00O | 10315 | -1915 | 6825 | 33 |
| H00P | 7775  | 6833  | 6843 | 37 |
| H00Q | 972   | 2426  | 7022 | 34 |
| H00R | 1329  | 1396  | 6507 | 34 |
| H00S | 7721  | 5043  | 7326 | 29 |
| H00T | 8171  | 7087  | 5614 | 37 |
| H00U | 8828  | 1138  | 9127 | 39 |
| H00V | 4761  | 375   | 6566 | 33 |
| H00W | 5500  | 164   | 5828 | 33 |
| H00X | 6893  | 1212  | 9741 | 42 |
| H00Y | 4989  | 1114  | 9102 | 39 |
| H00Z | 6305  | -1506 | 6262 | 62 |
| H    | 4797  | -1517 | 6361 | 62 |
| HA   | 5698  | -1280 | 7038 | 62 |

# VI. $^1\text{H}$ and $^{13}\text{C}$ NMR Data; ee Analysis

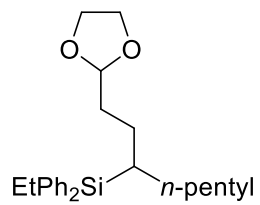

Table 2, entry 1  
(400 MHz, CDCl<sub>3</sub>)

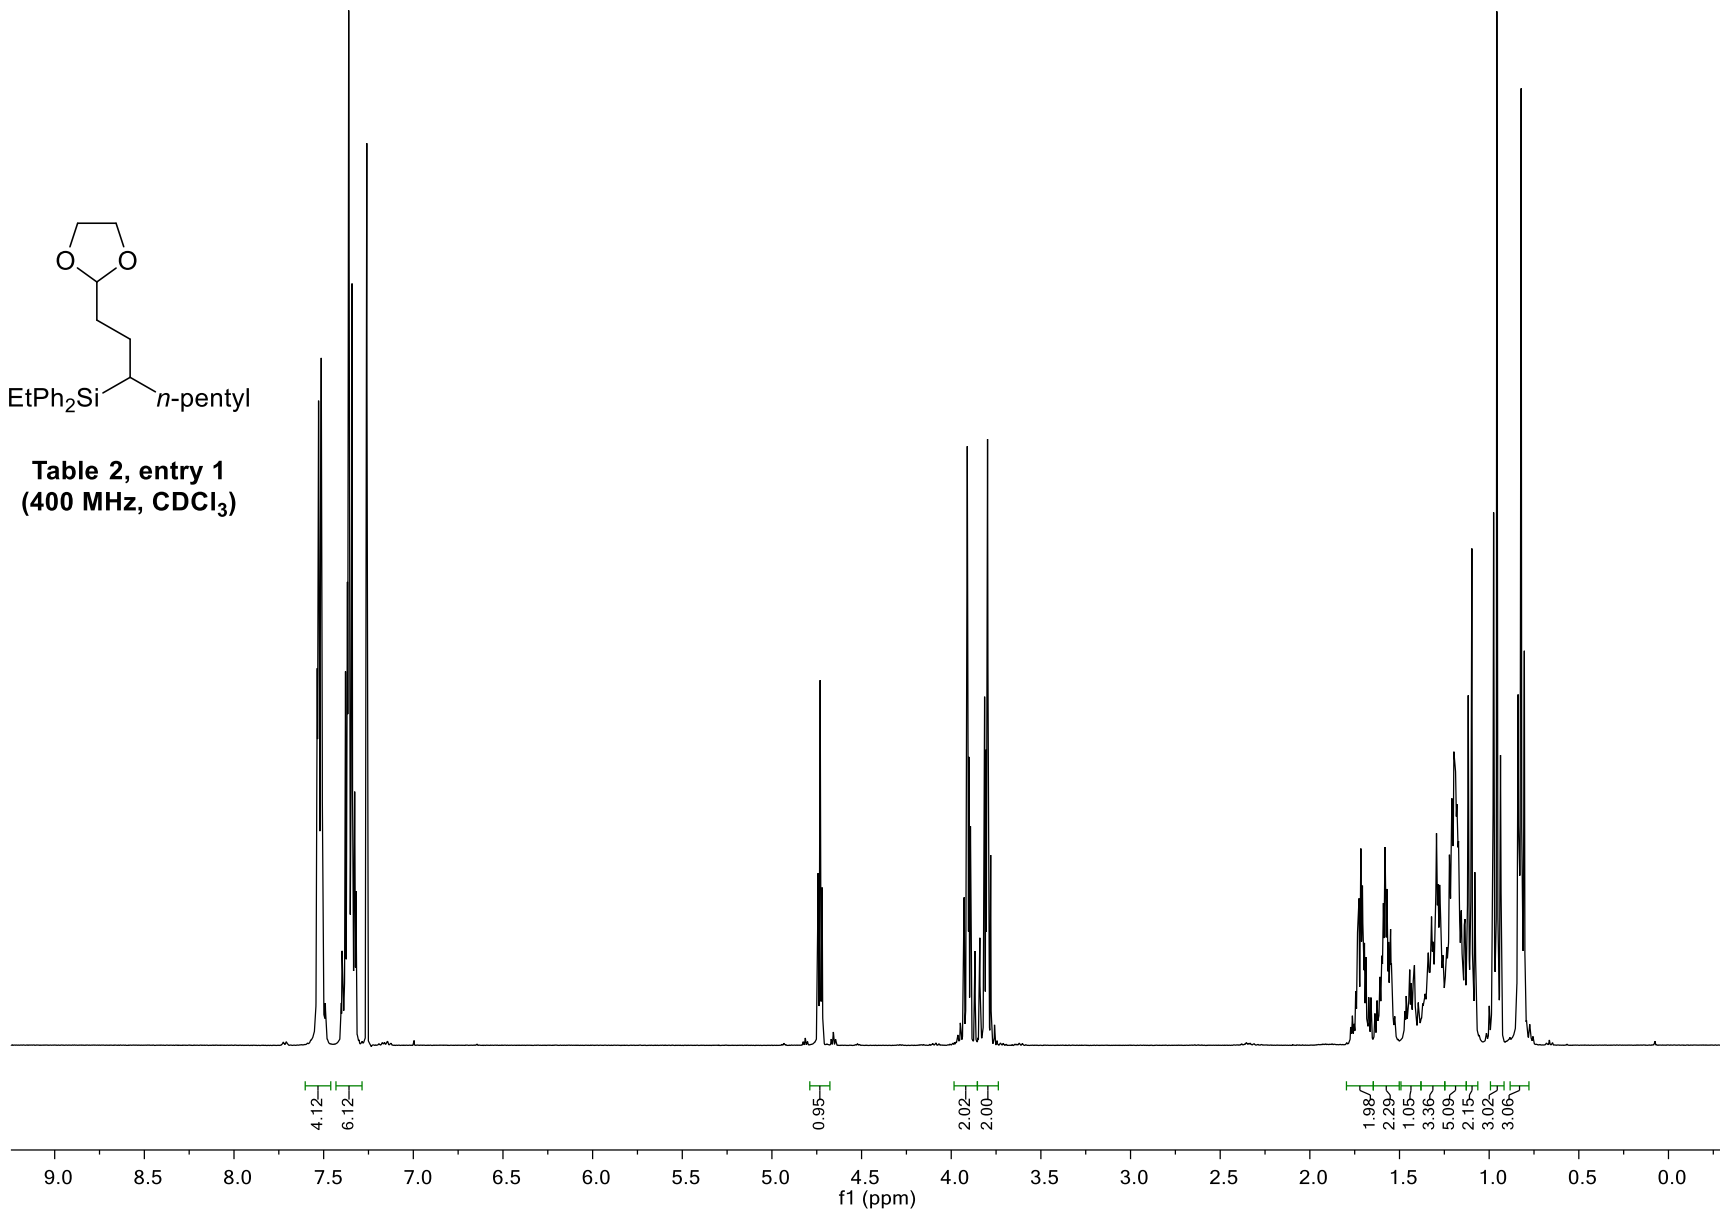



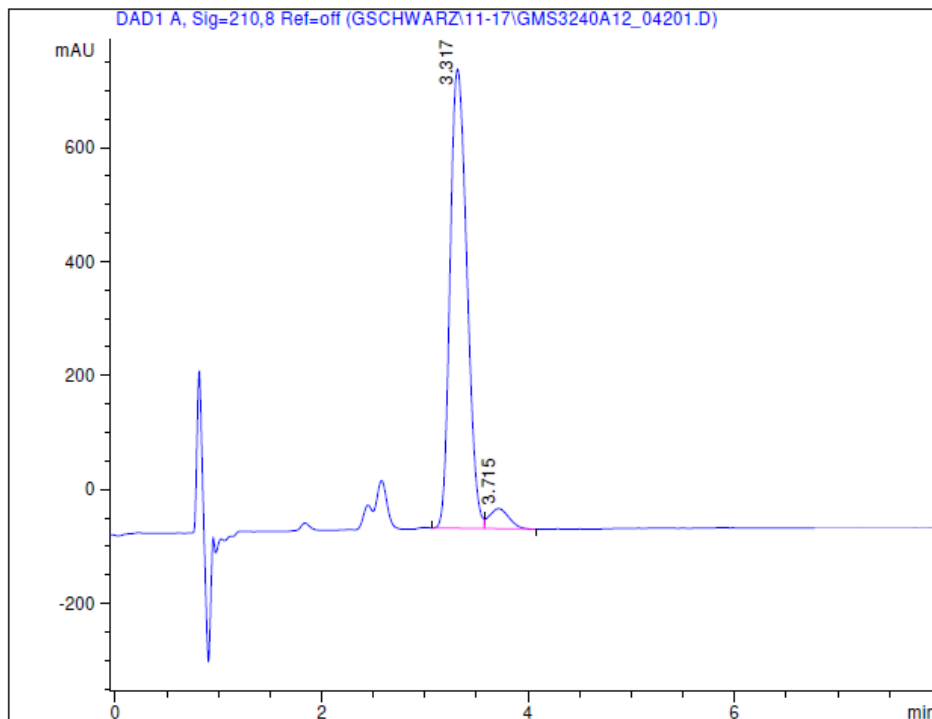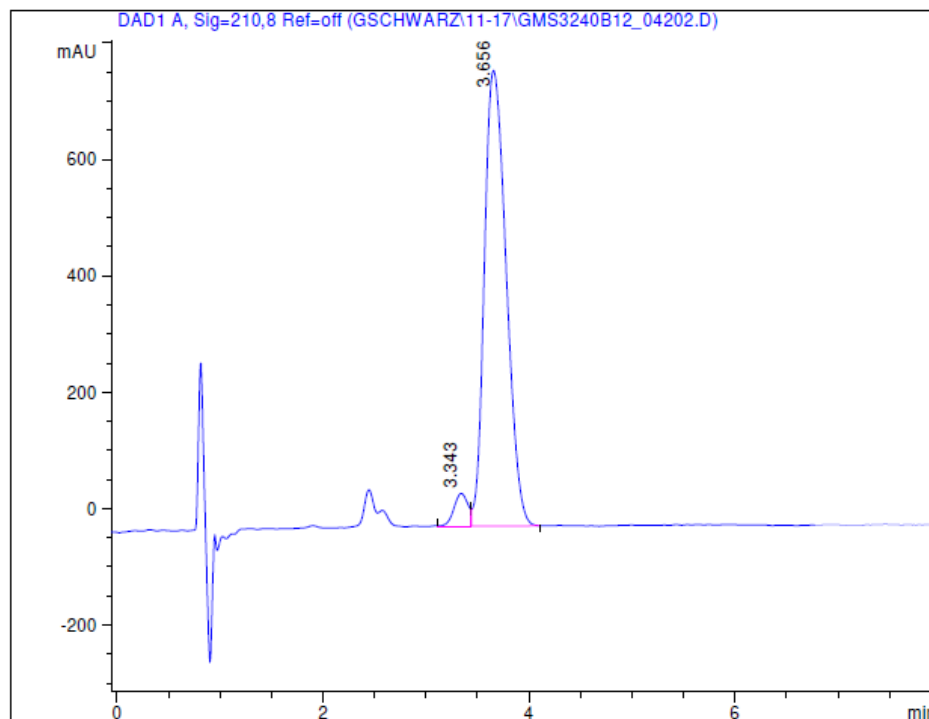

Signal 1:DAD1 A, Sig=210,8 Ref=off

| Peak # | RT [min] | Width [min] | Area | Area % |
|--------|----------|-------------|------|--------|
| 1      | 3.32     | 0.19        | 9114 | 95.19  |
| 2      | 3.72     | 0.22        | 461  | 4.81   |

Signal 1:DAD1 A, Sig=210,8 Ref=off

| Peak # | RT [min] | Width [min] | Area  | Area % |
|--------|----------|-------------|-------|--------|
| 1      | 3.34     | 0.16        | 535   | 4.45   |
| 2      | 3.66     | 0.24        | 11498 | 95.55  |

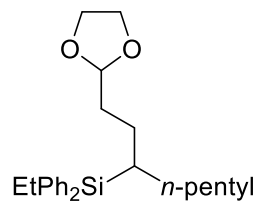

**Table 2, entry 1**  
**SFC: CHIRALCEL OJ column (5% 2-PrOH in supercritical CO<sub>2</sub>, 3.5 mL/min)**

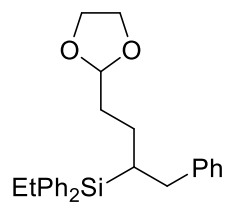

Table 2, entry 2  
(400 MHz, CDCl<sub>3</sub>)

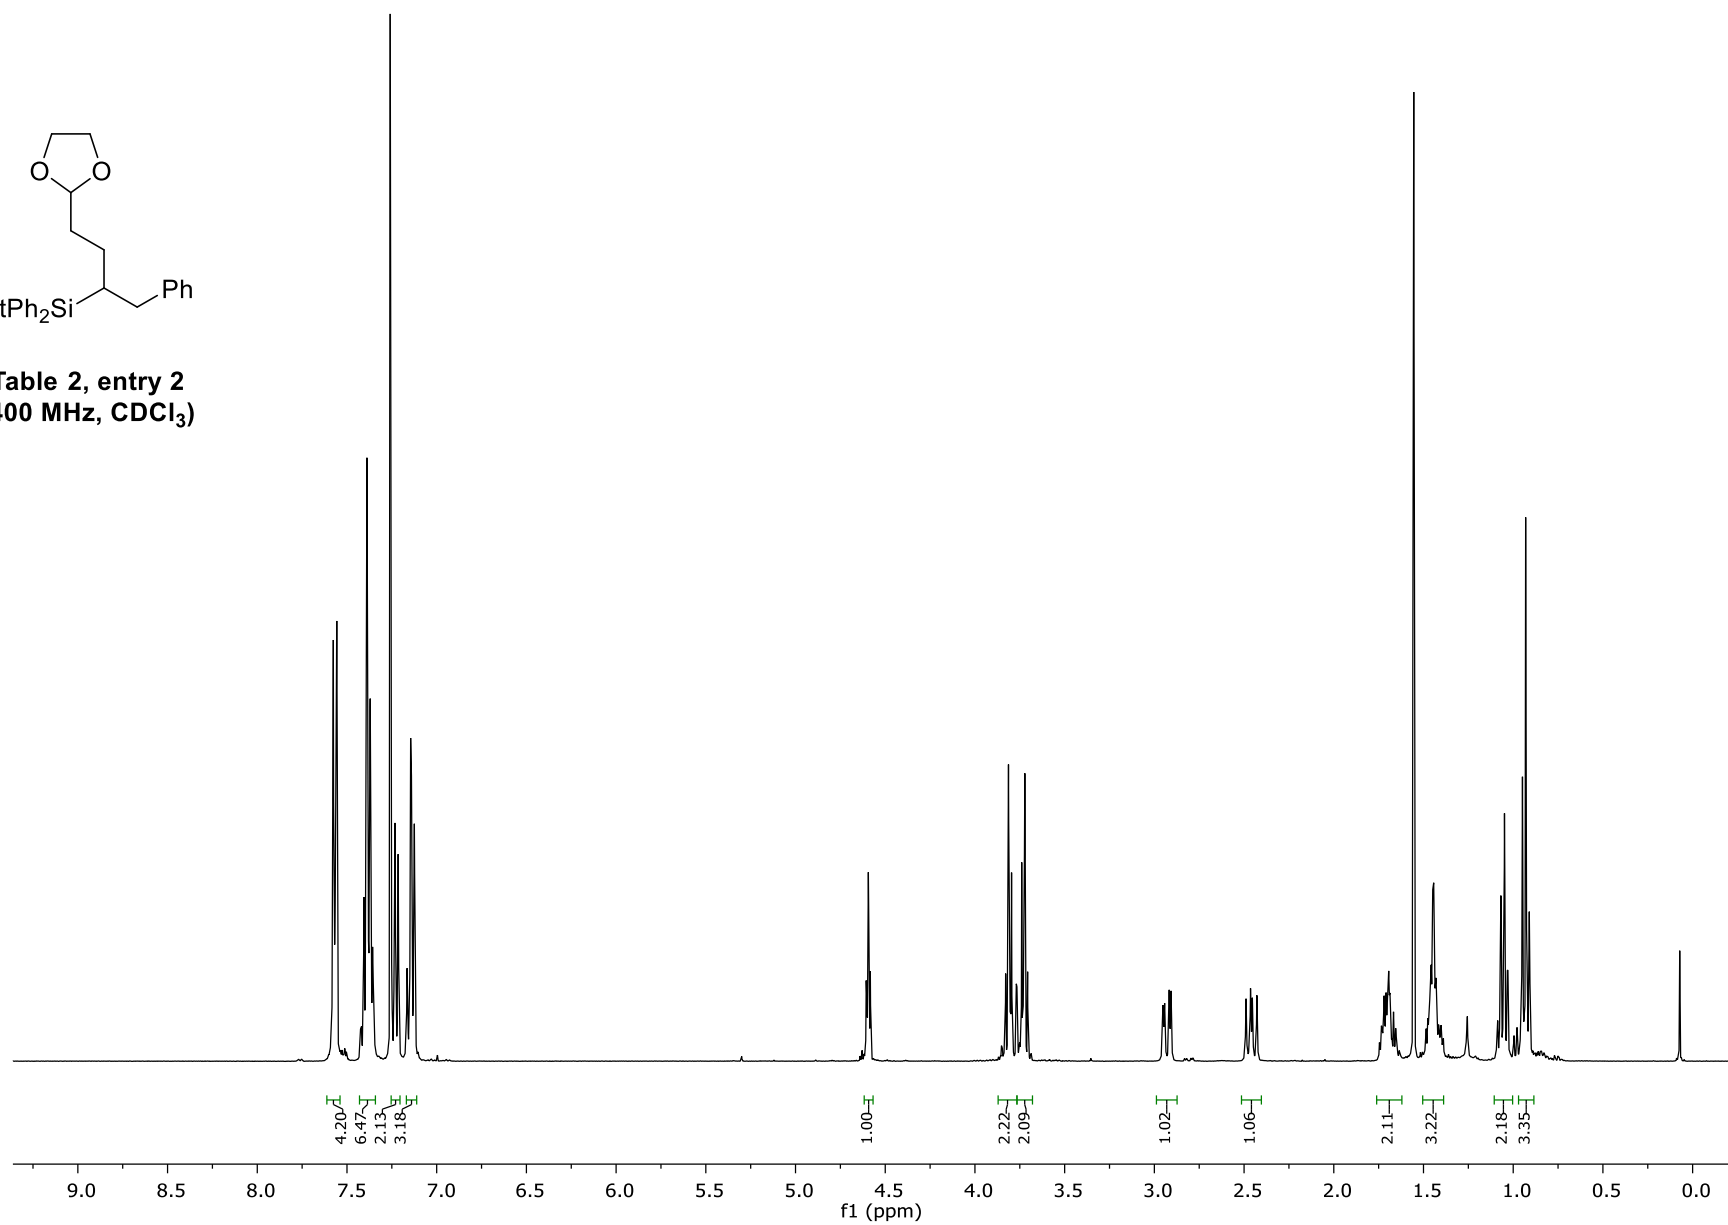

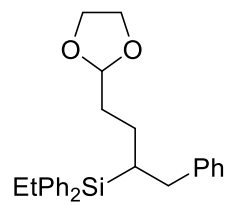

Table 2, entry 2  
(101 MHz, CDCl<sub>3</sub>)

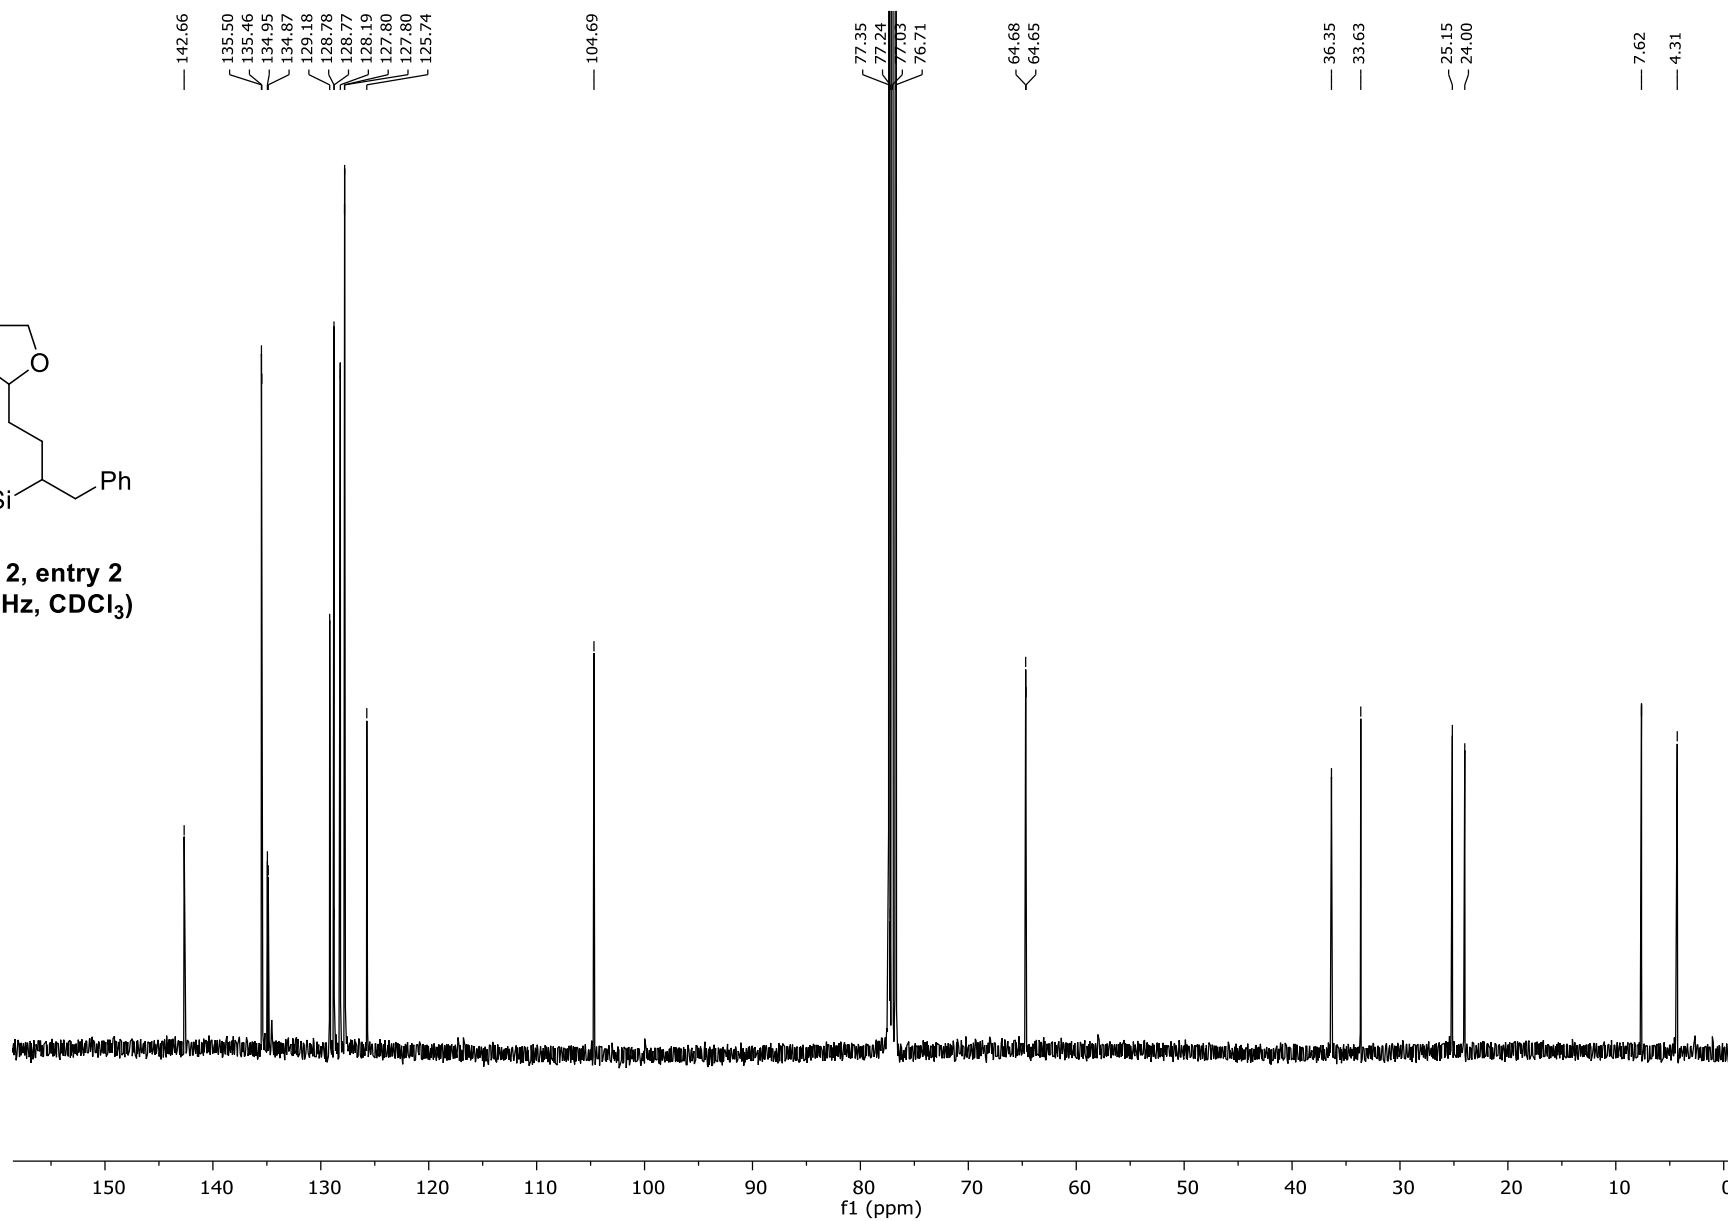

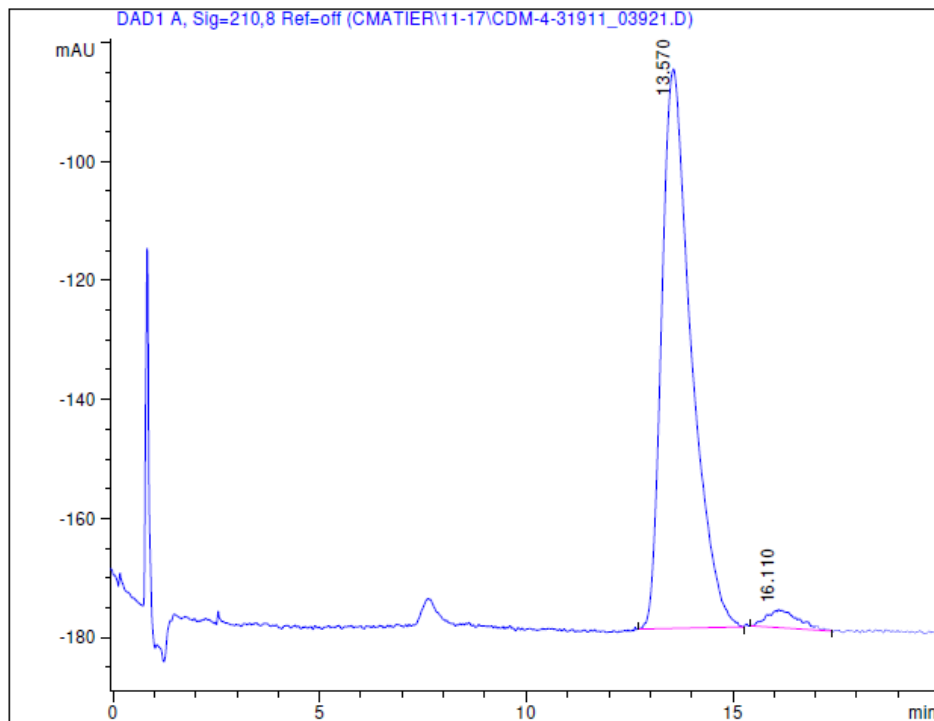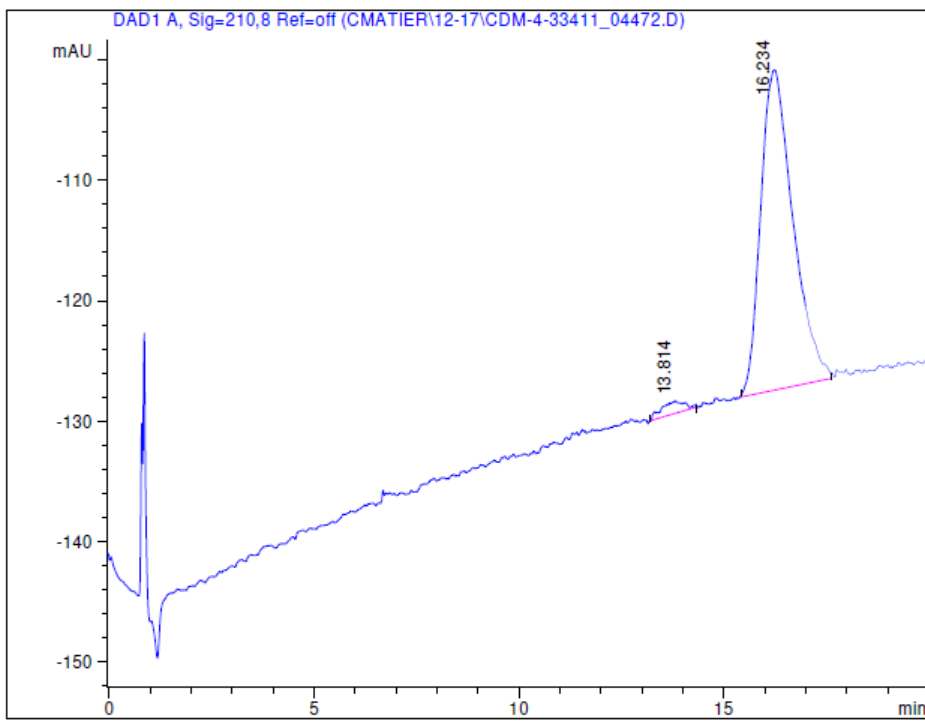

Signal 1:DAD1 A, Sig=210,8 Ref=off

| Peak # | RT [min] | Width [min] | Area | Area % |
|--------|----------|-------------|------|--------|
| 1      | 13.57    | 0.83        | 4667 | 96.64  |
| 2      | 16.11    | 0.89        | 162  | 3.36   |

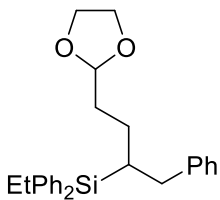

Signal 1:DAD1 A, Sig=210,8 Ref=off

| Peak # | RT [min] | Width [min] | Area | Area % |
|--------|----------|-------------|------|--------|
| 1      | 13.81    | 0.66        | 42   | 2.80   |
| 2      | 16.23    | 0.69        | 1453 | 97.20  |

**Table 2, entry 2**

**SFC:** CHIRALPAK IC-3 column (2% 2-PrOH in supercritical CO<sub>2</sub>, 3.5 mL/min)

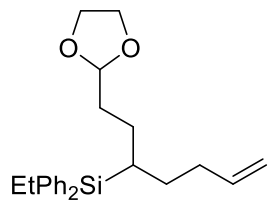

Table 2, entry 3  
(400 MHz, CDCl<sub>3</sub>)

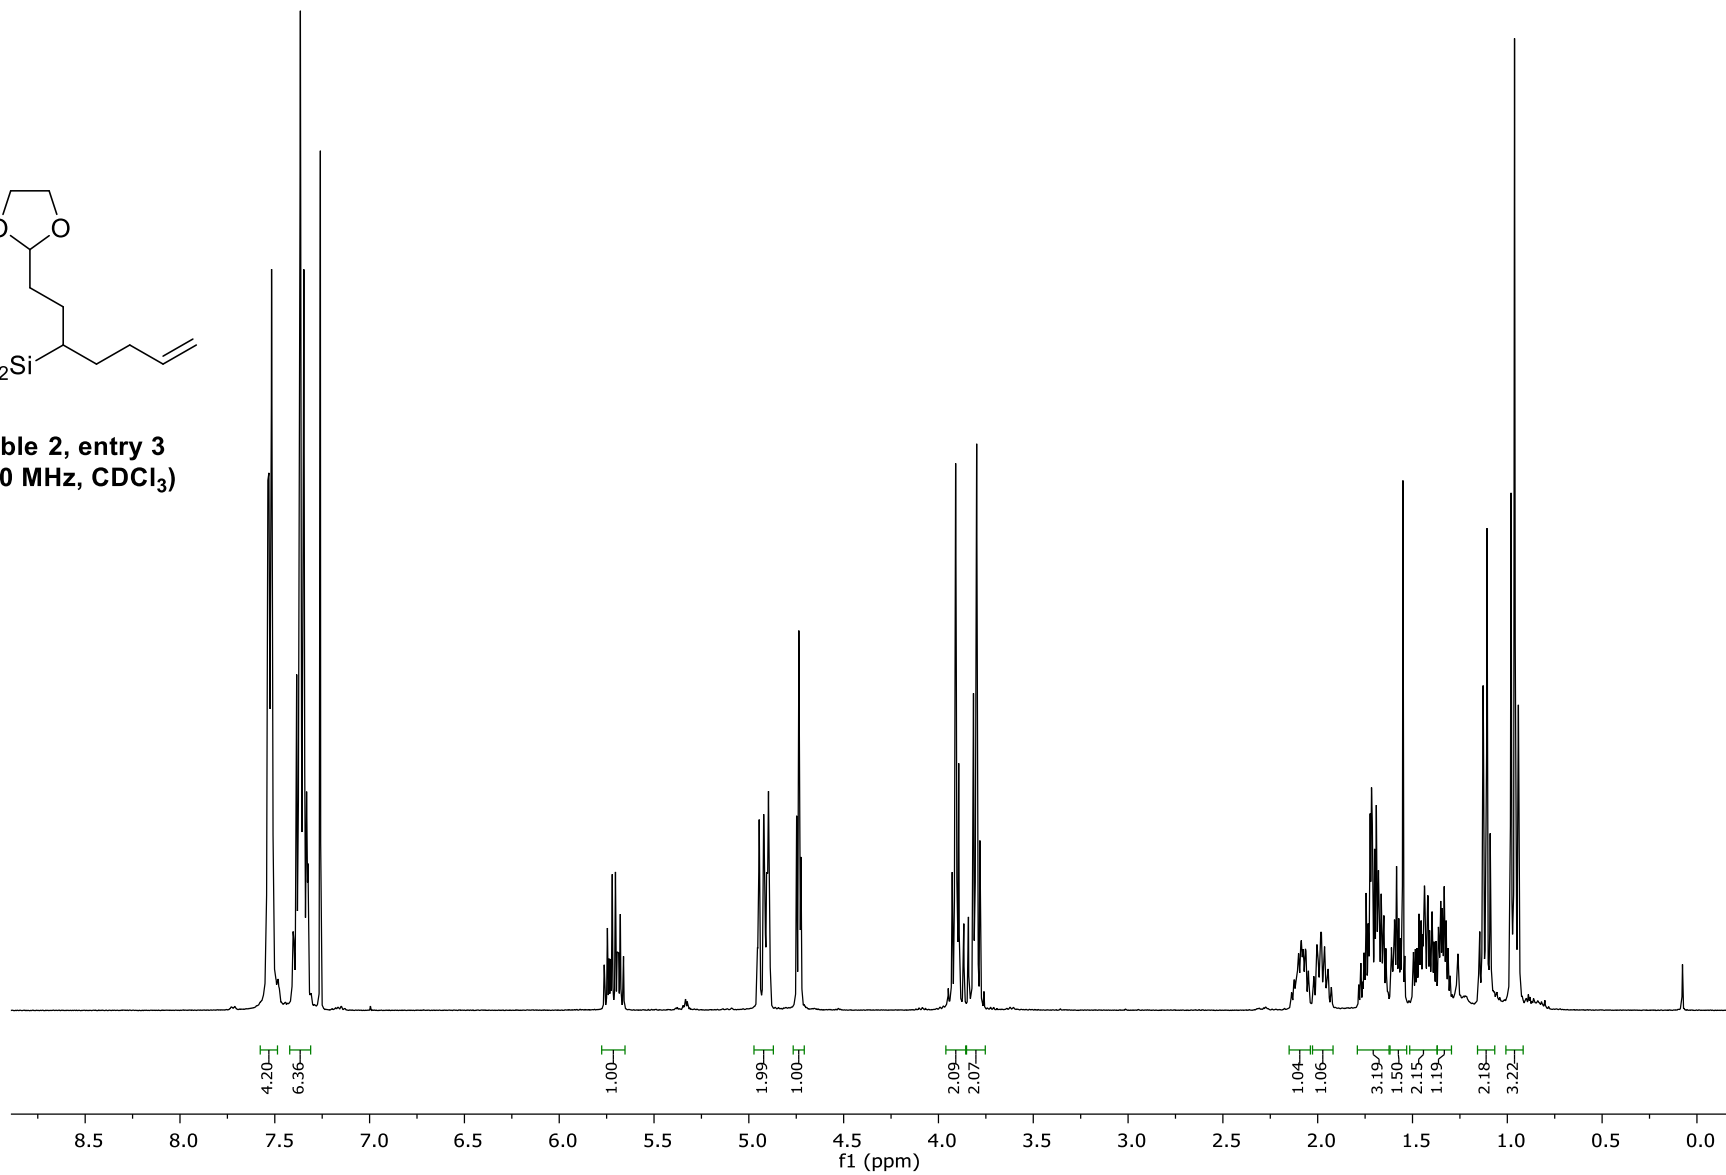



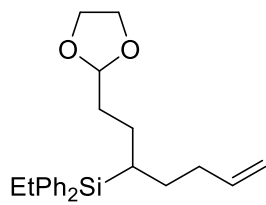

Table 2, entry 3  
(101 MHz, CDCl<sub>3</sub>)

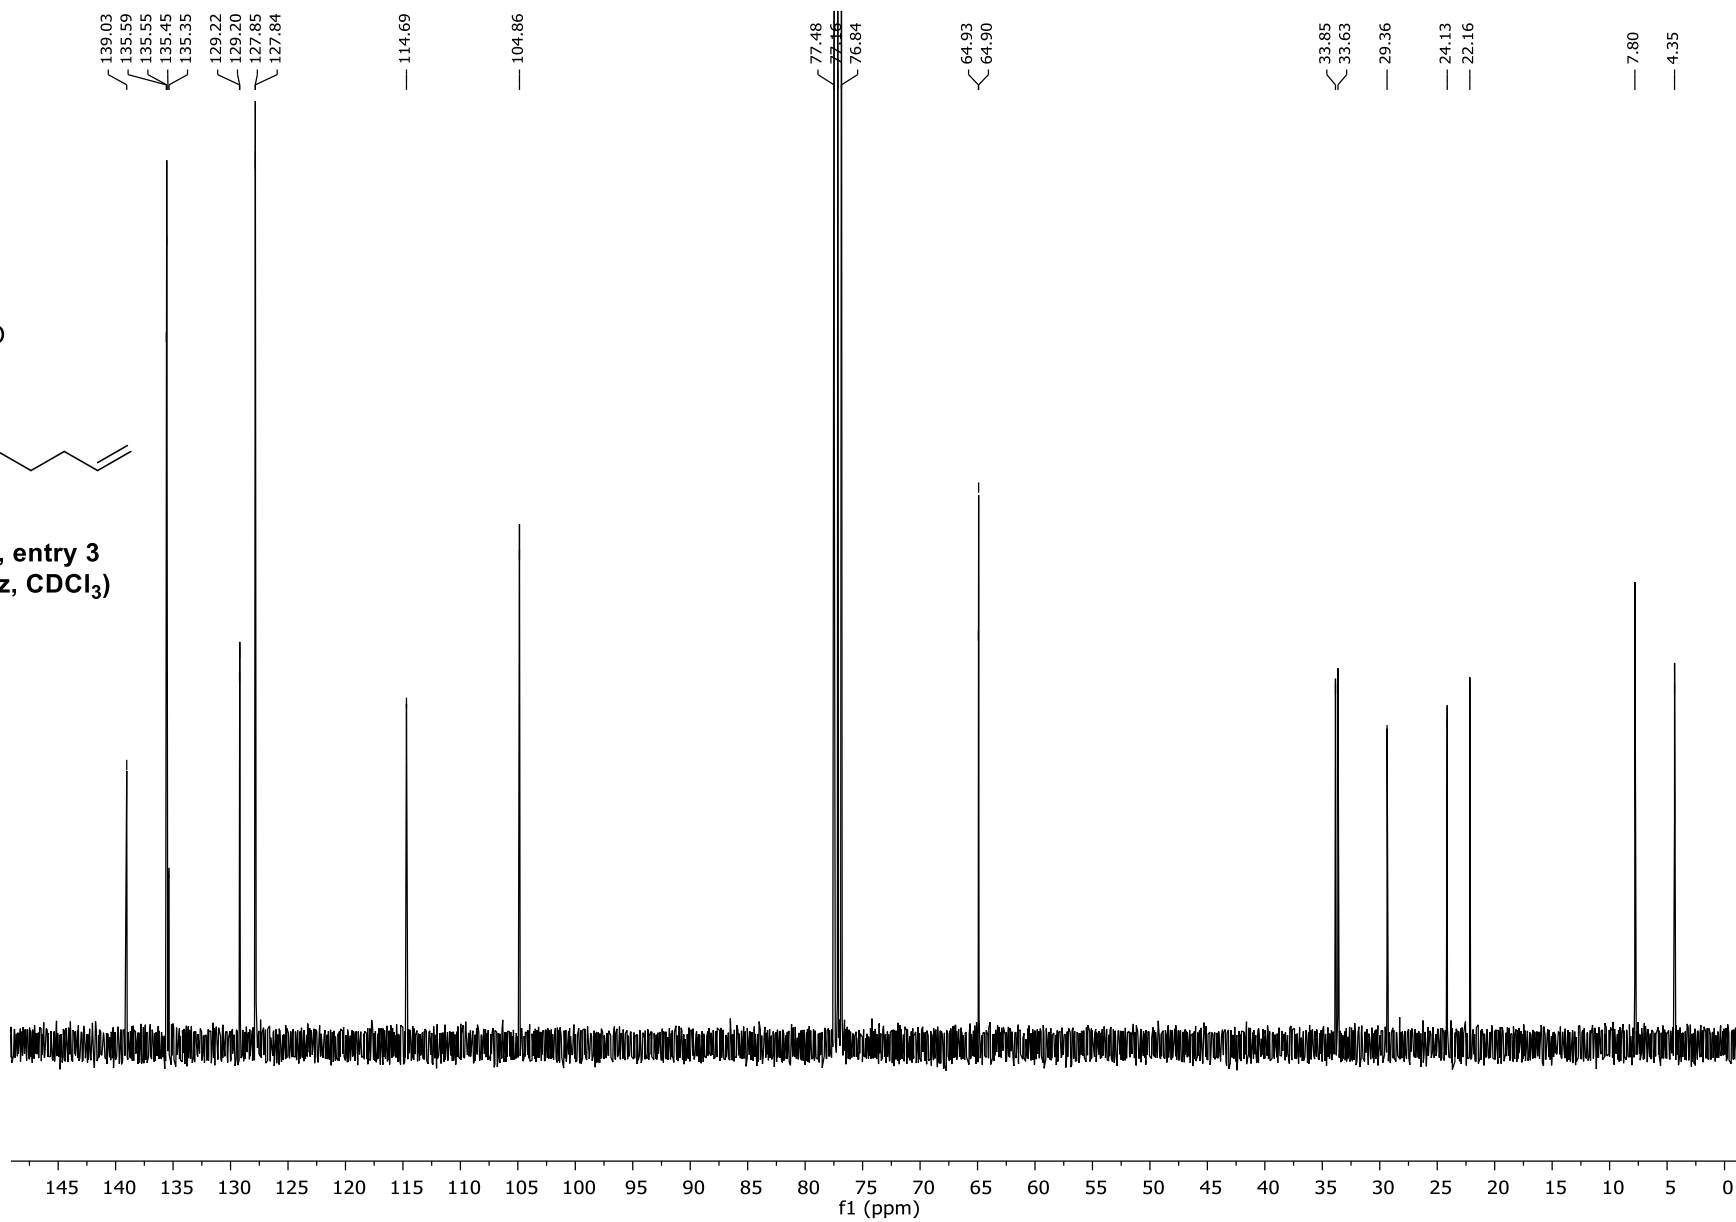

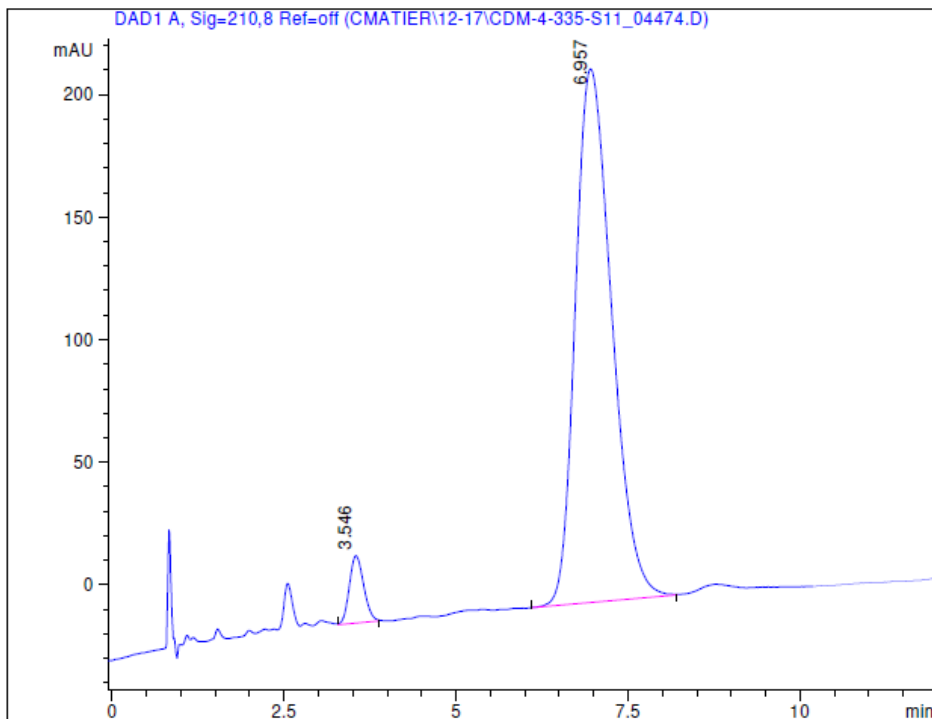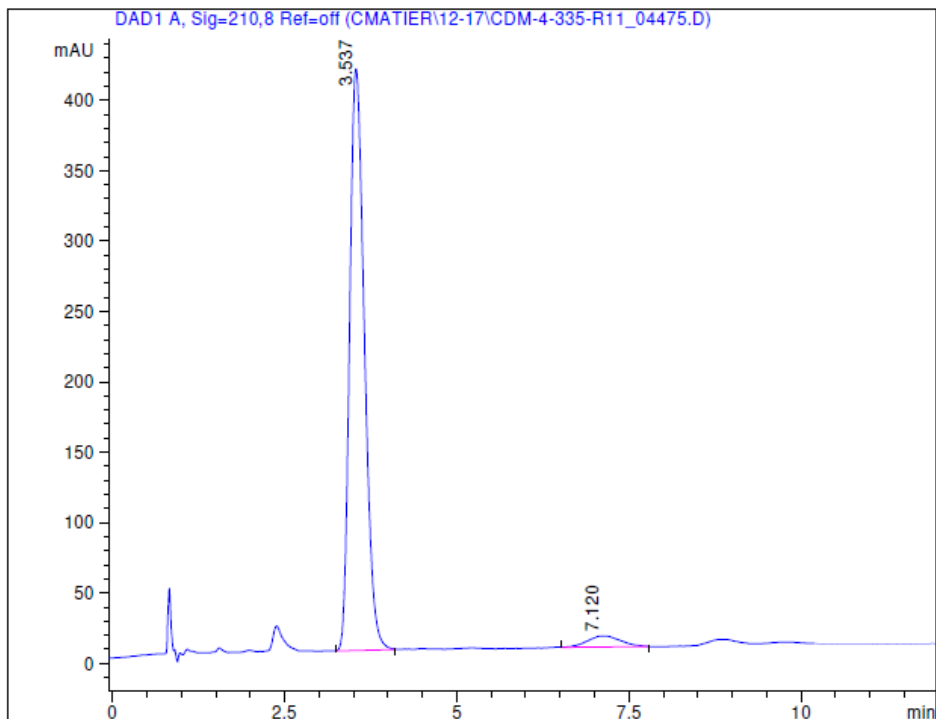

Signal 1:DAD1 A, Sig=210,8 Ref=off

| Peak # | RT [min] | Width [min] | Area | Area % |
|--------|----------|-------------|------|--------|
| 1      | 3.55     | 0.24        | 399  | 4.76   |
| 2      | 6.96     | 0.61        | 7984 | 95.24  |

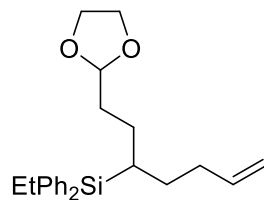

Signal 1:DAD1 A, Sig=210,8 Ref=off

| Peak # | RT [min] | Width [min] | Area | Area % |
|--------|----------|-------------|------|--------|
| 1      | 3.54     | 0.25        | 6140 | 95.94  |
| 2      | 7.12     | 0.56        | 260  | 4.06   |

**Table 2, entry 3**  
**SFC: CHIRALCEL OJ column (7% 2-PrOH in supercritical CO<sub>2</sub>, 3.5 mL/min)**

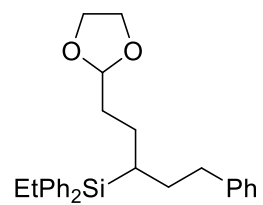

Table 2, entry 4  
(400 MHz, CDCl<sub>3</sub>)

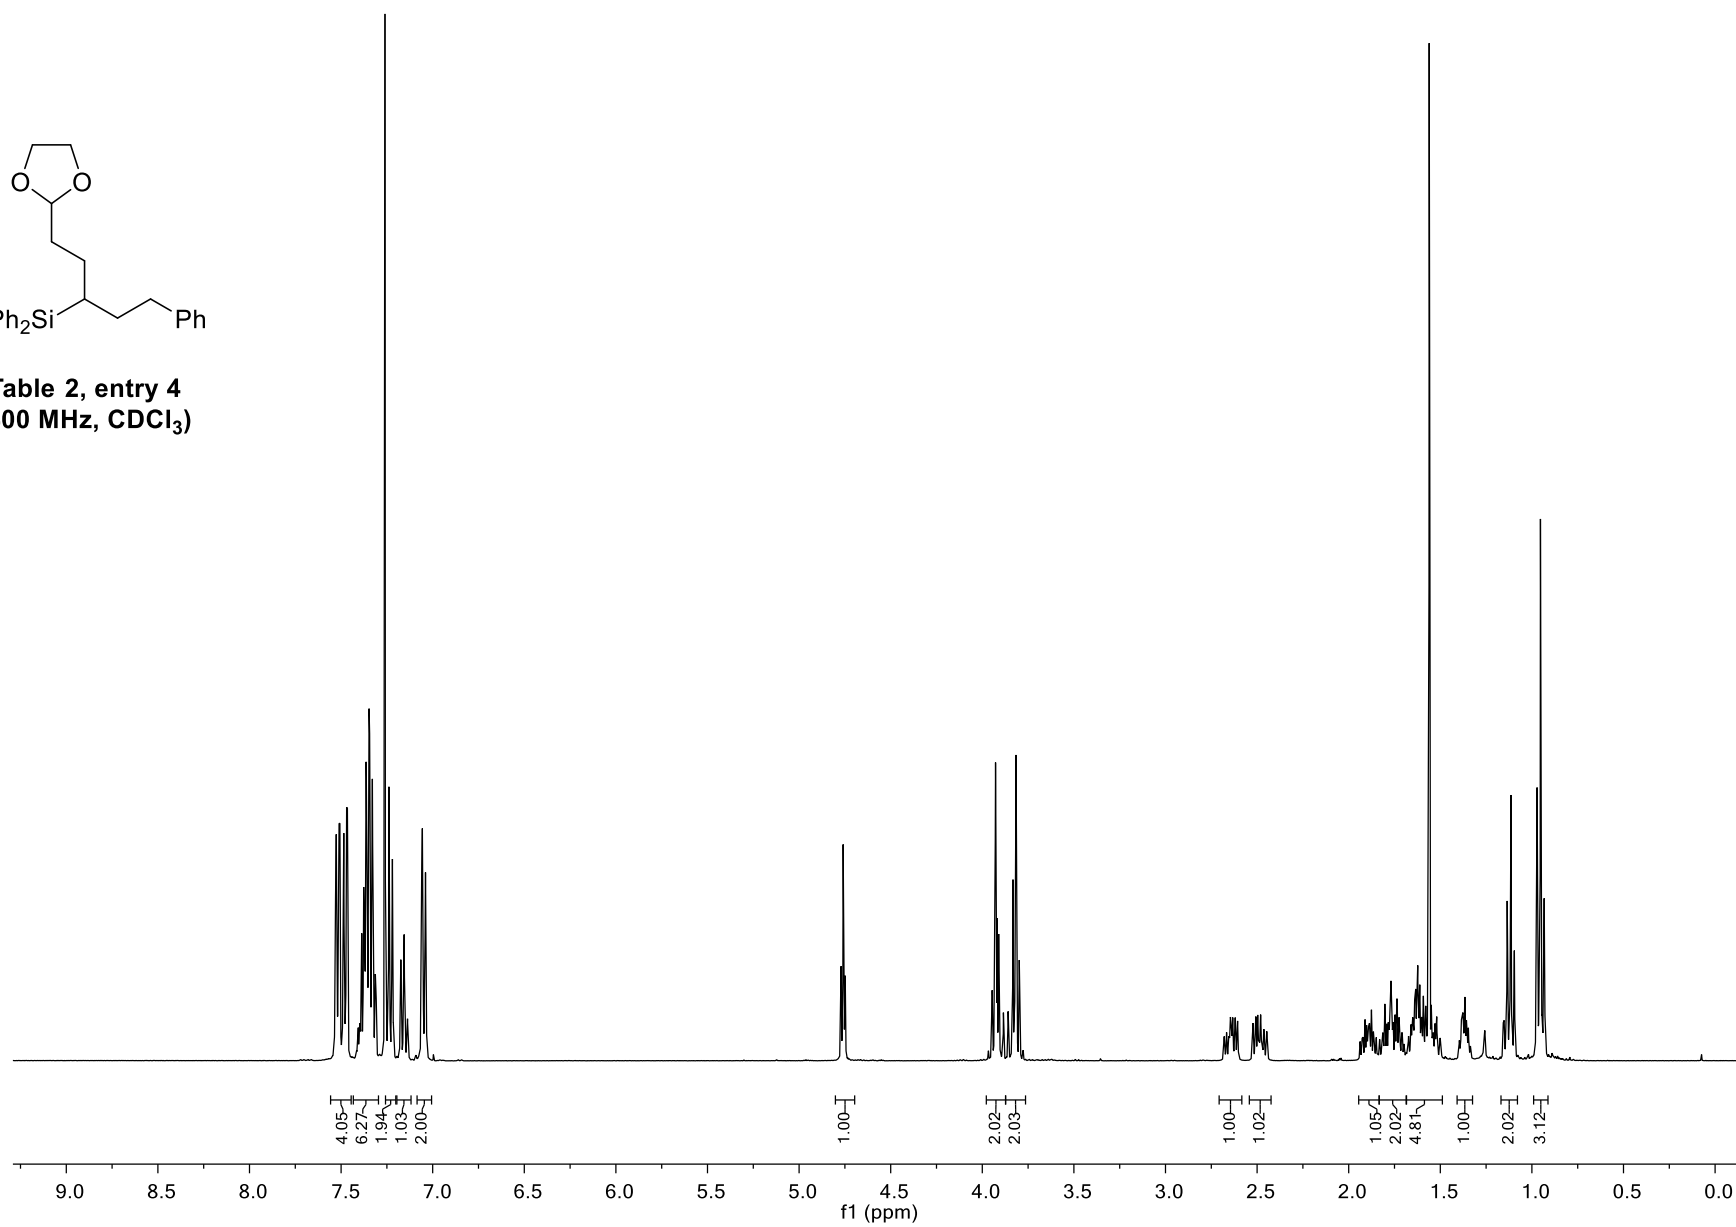

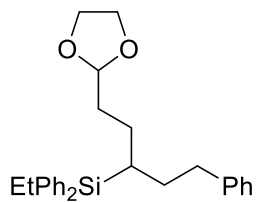

Table 2, entry 4  
(101 MHz, CDCl<sub>3</sub>)

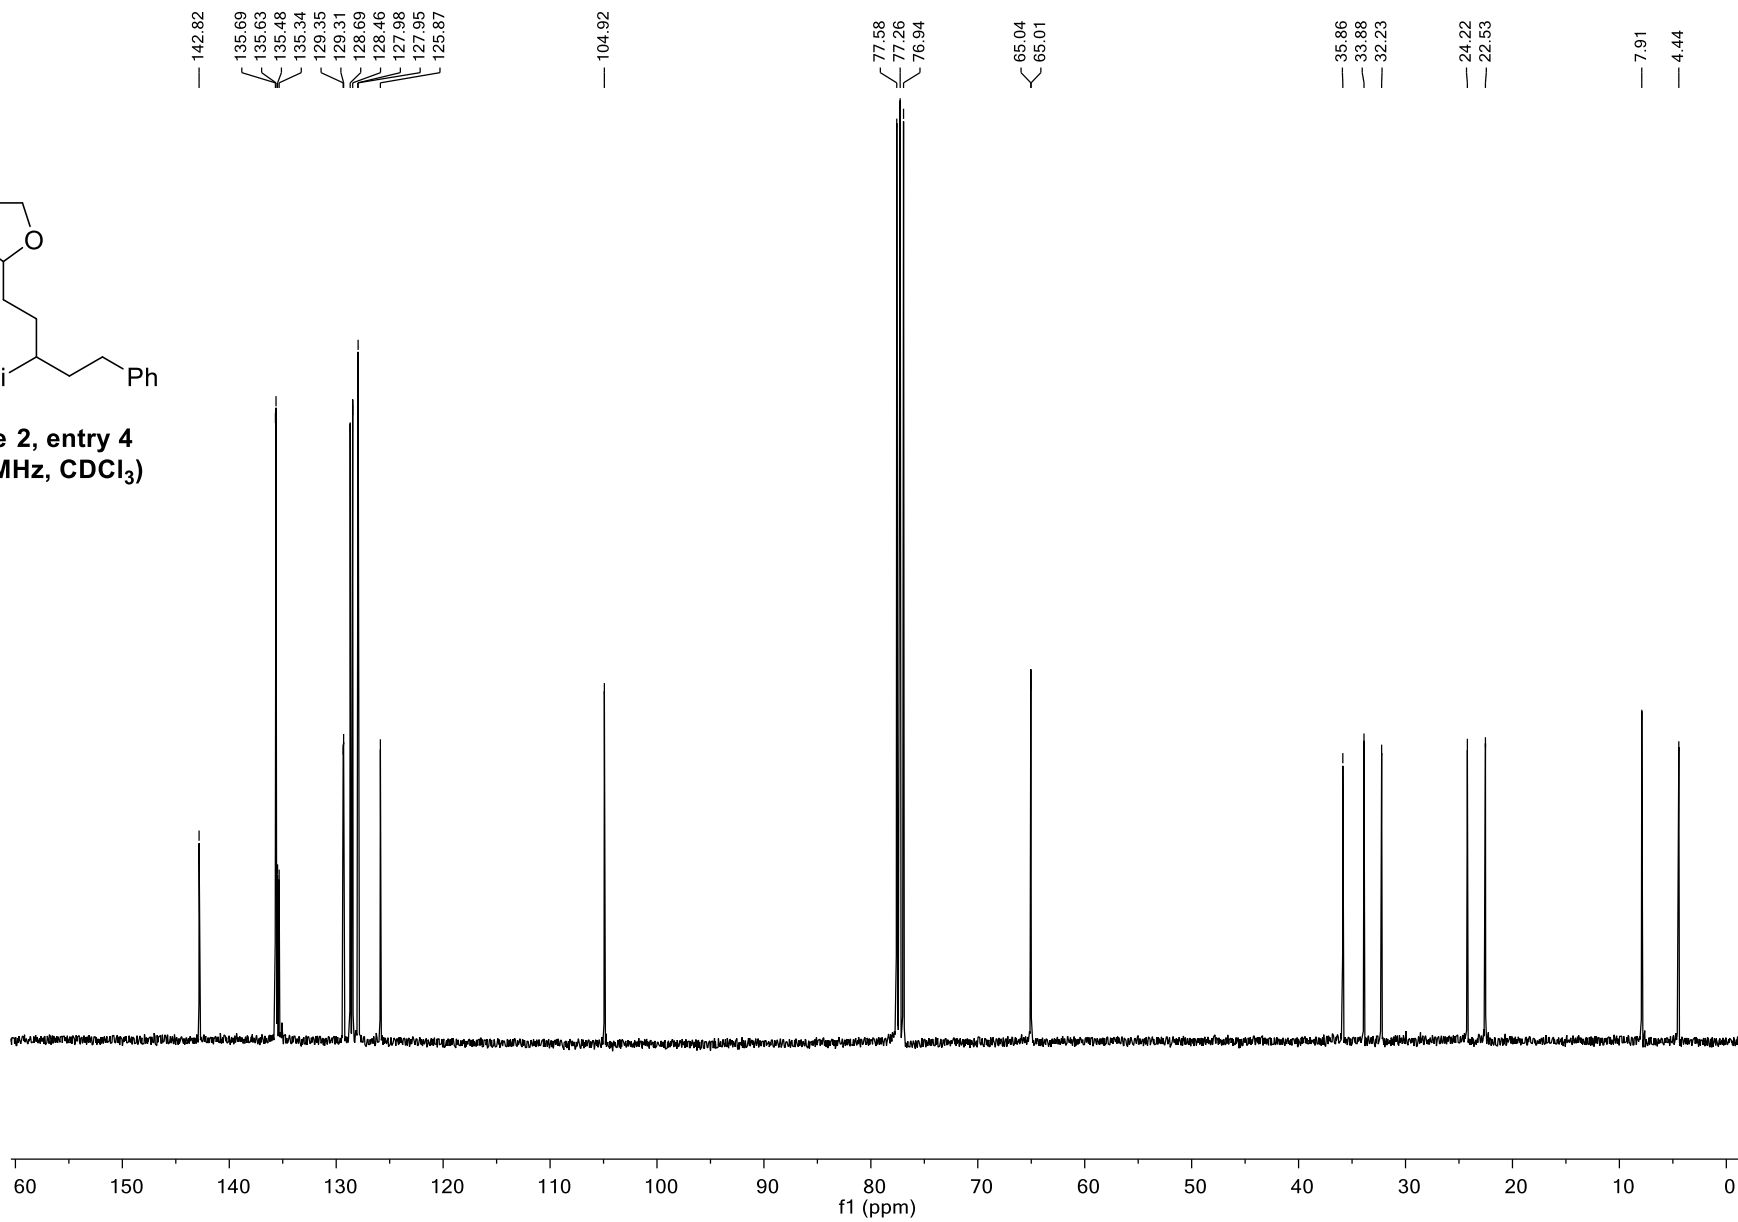

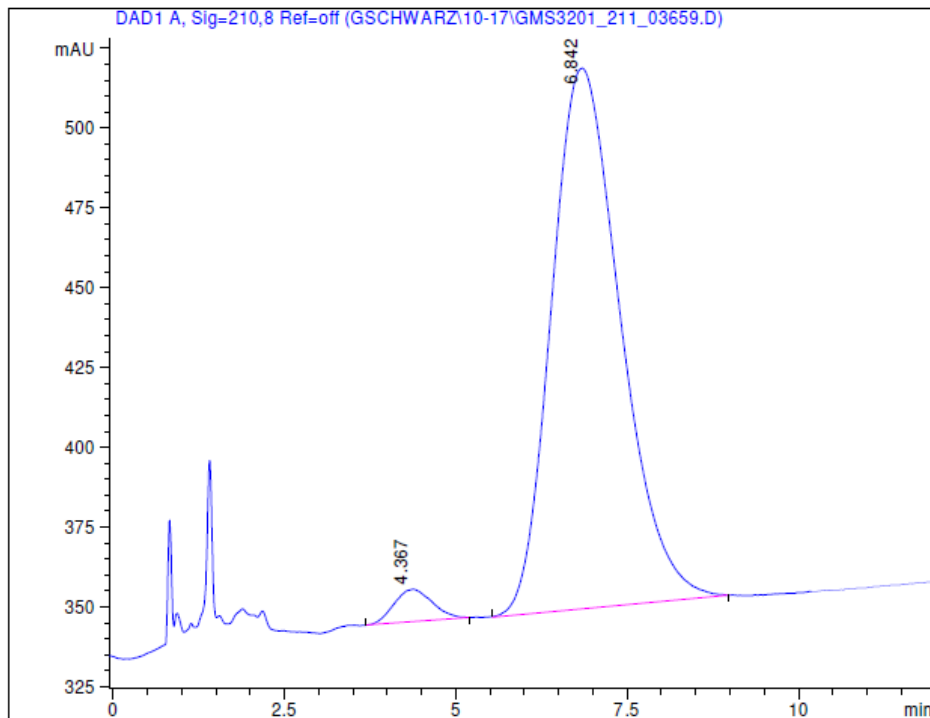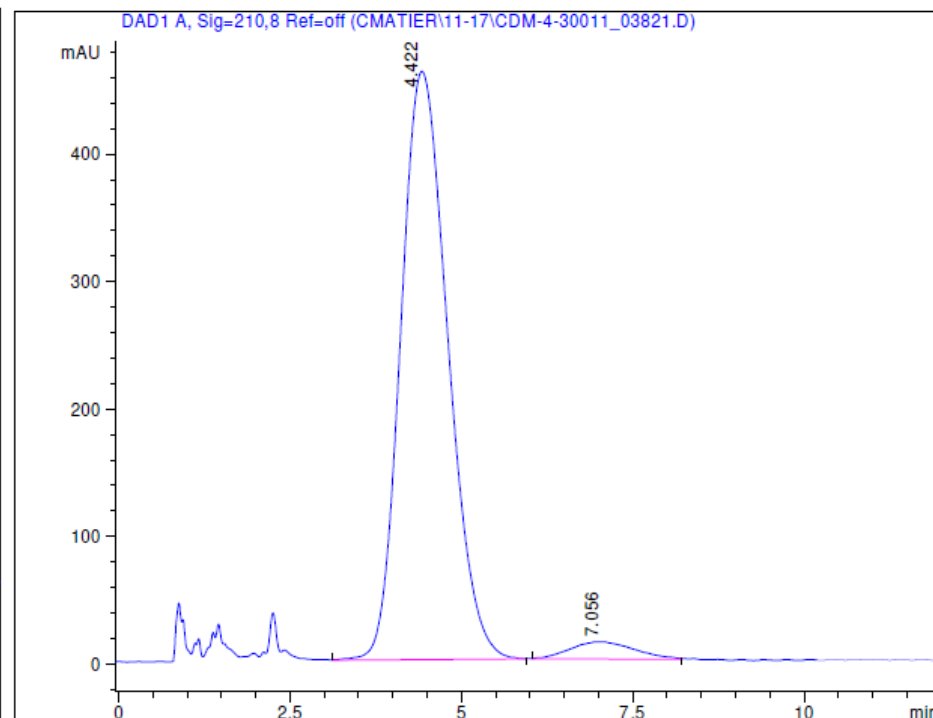

Signal 1:DAD1 A, Sig=210,8 Ref=off

| Peak # | RT [min] | Width [min] | Area  | Area % |
|--------|----------|-------------|-------|--------|
| 1      | 4.37     | 0.64        | 388   | 3.18   |
| 2      | 6.84     | 1.16        | 11821 | 96.82  |

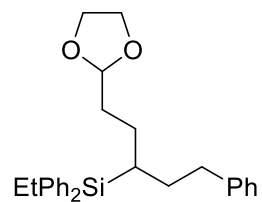

Signal 1:DAD1 A, Sig=210,8 Ref=off

| Peak # | RT [min] | Width [min] | Area  | Area % |
|--------|----------|-------------|-------|--------|
| 1      | 4.42     | 0.79        | 22006 | 96.18  |
| 2      | 7.06     | 1.08        | 875   | 3.82   |

**Table 2, entry 4**

**SFC:** CHIRALCEL OJ column (35% 2-PrOH in supercritical CO<sub>2</sub>, 3.5 mL/min)



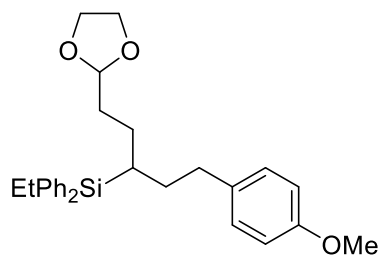

Table 2, entry 5  
(101 MHz, CDCl<sub>3</sub>)

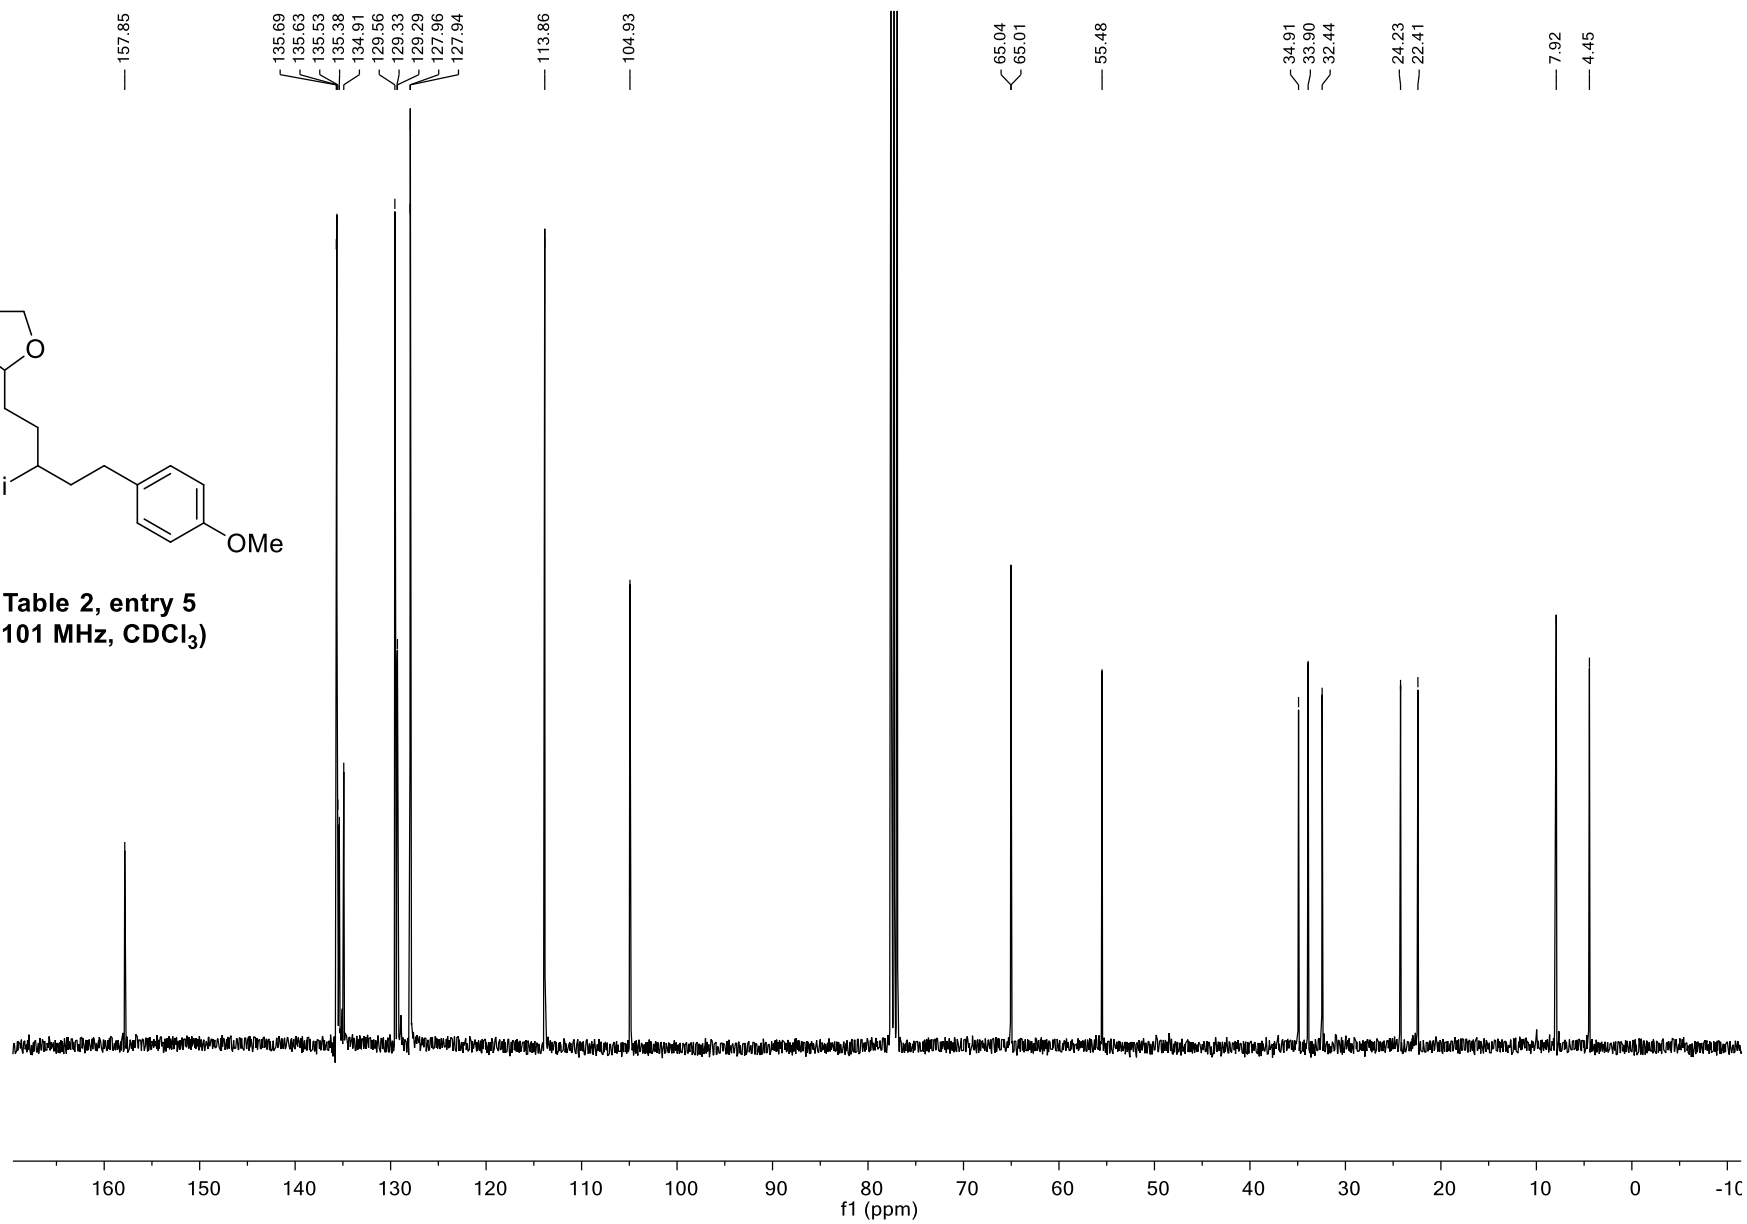

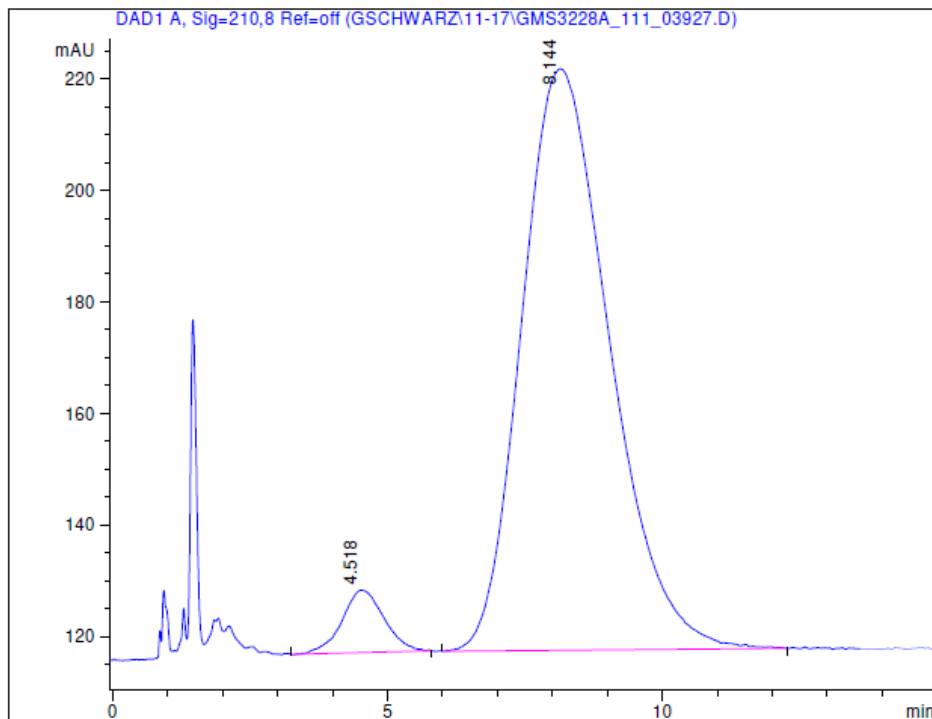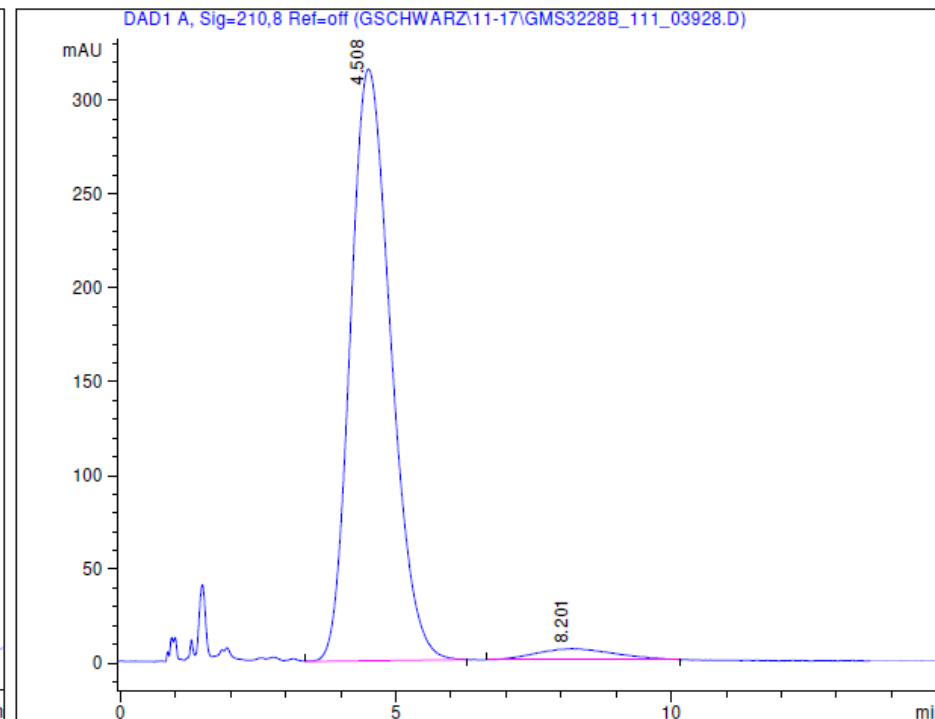

Signal 1:DAD1 A, Sig=210,8 Ref=off

| Peak # | RT [min] | Width [min] | Area  | Area % |
|--------|----------|-------------|-------|--------|
| 1      | 4.52     | 1.00        | 593   | 4.87   |
| 2      | 8.14     | 1.85        | 11576 | 95.13  |

Signal 1:DAD1 A, Sig=210,8 Ref=off

| Peak # | RT [min] | Width [min] | Area  | Area % |
|--------|----------|-------------|-------|--------|
| 1      | 4.51     | 0.85        | 16037 | 96.39  |
| 2      | 8.20     | 1.70        | 600   | 3.61   |

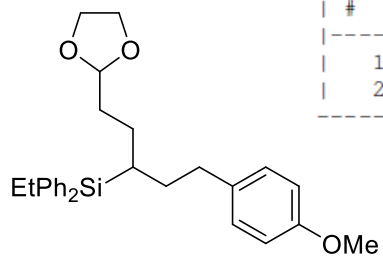

**Table 2, entry 5**  
**SFC:** CHIRALCEL OJ column (40% 2-PrOH in supercritical CO<sub>2</sub>, 3.5 mL/min)



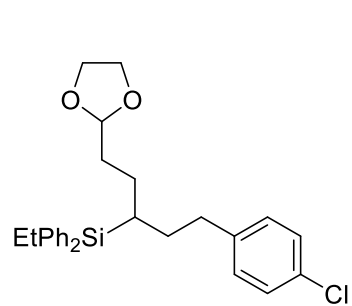

Table 2, entry 6  
(400 MHz, CDCl<sub>3</sub>)

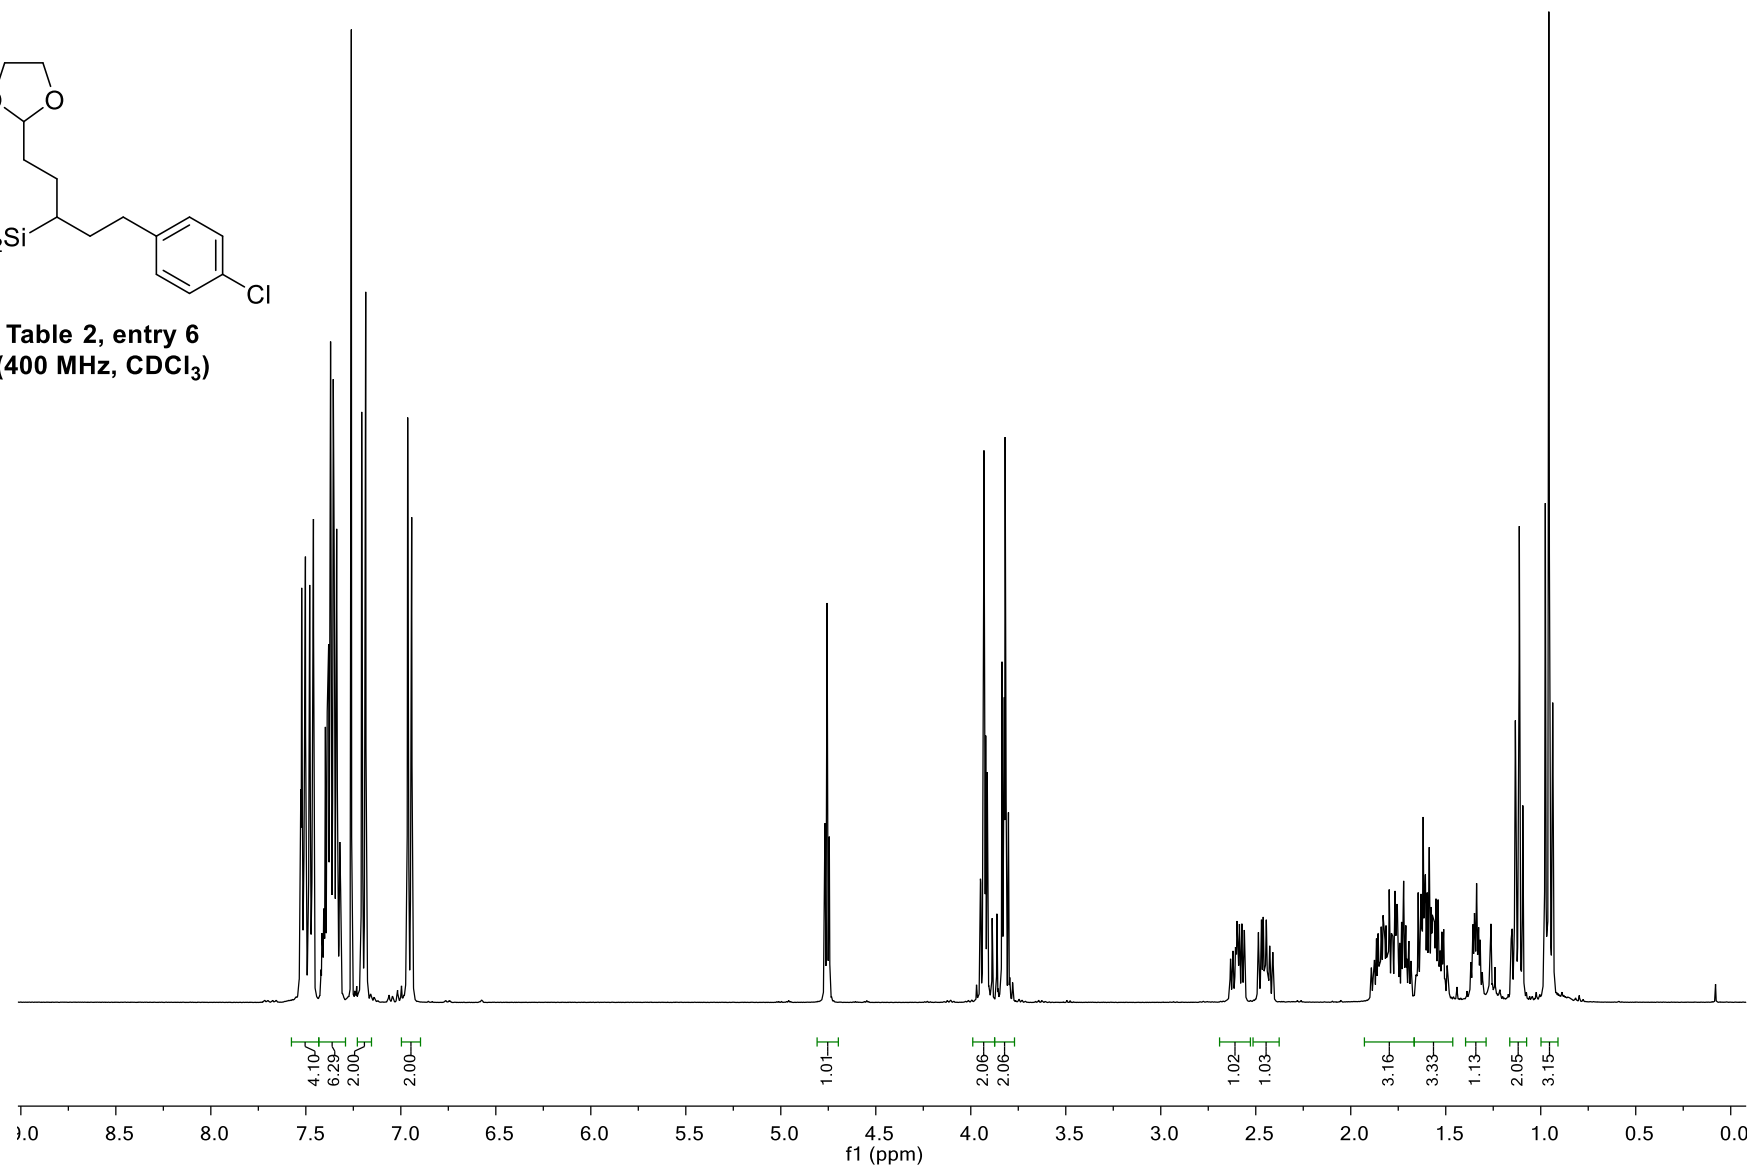

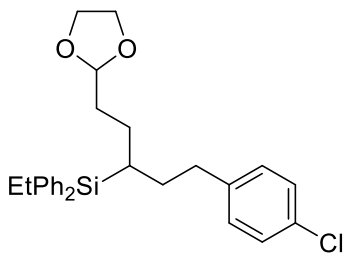

Table 2, entry 6  
(101 MHz, CDCl<sub>3</sub>)

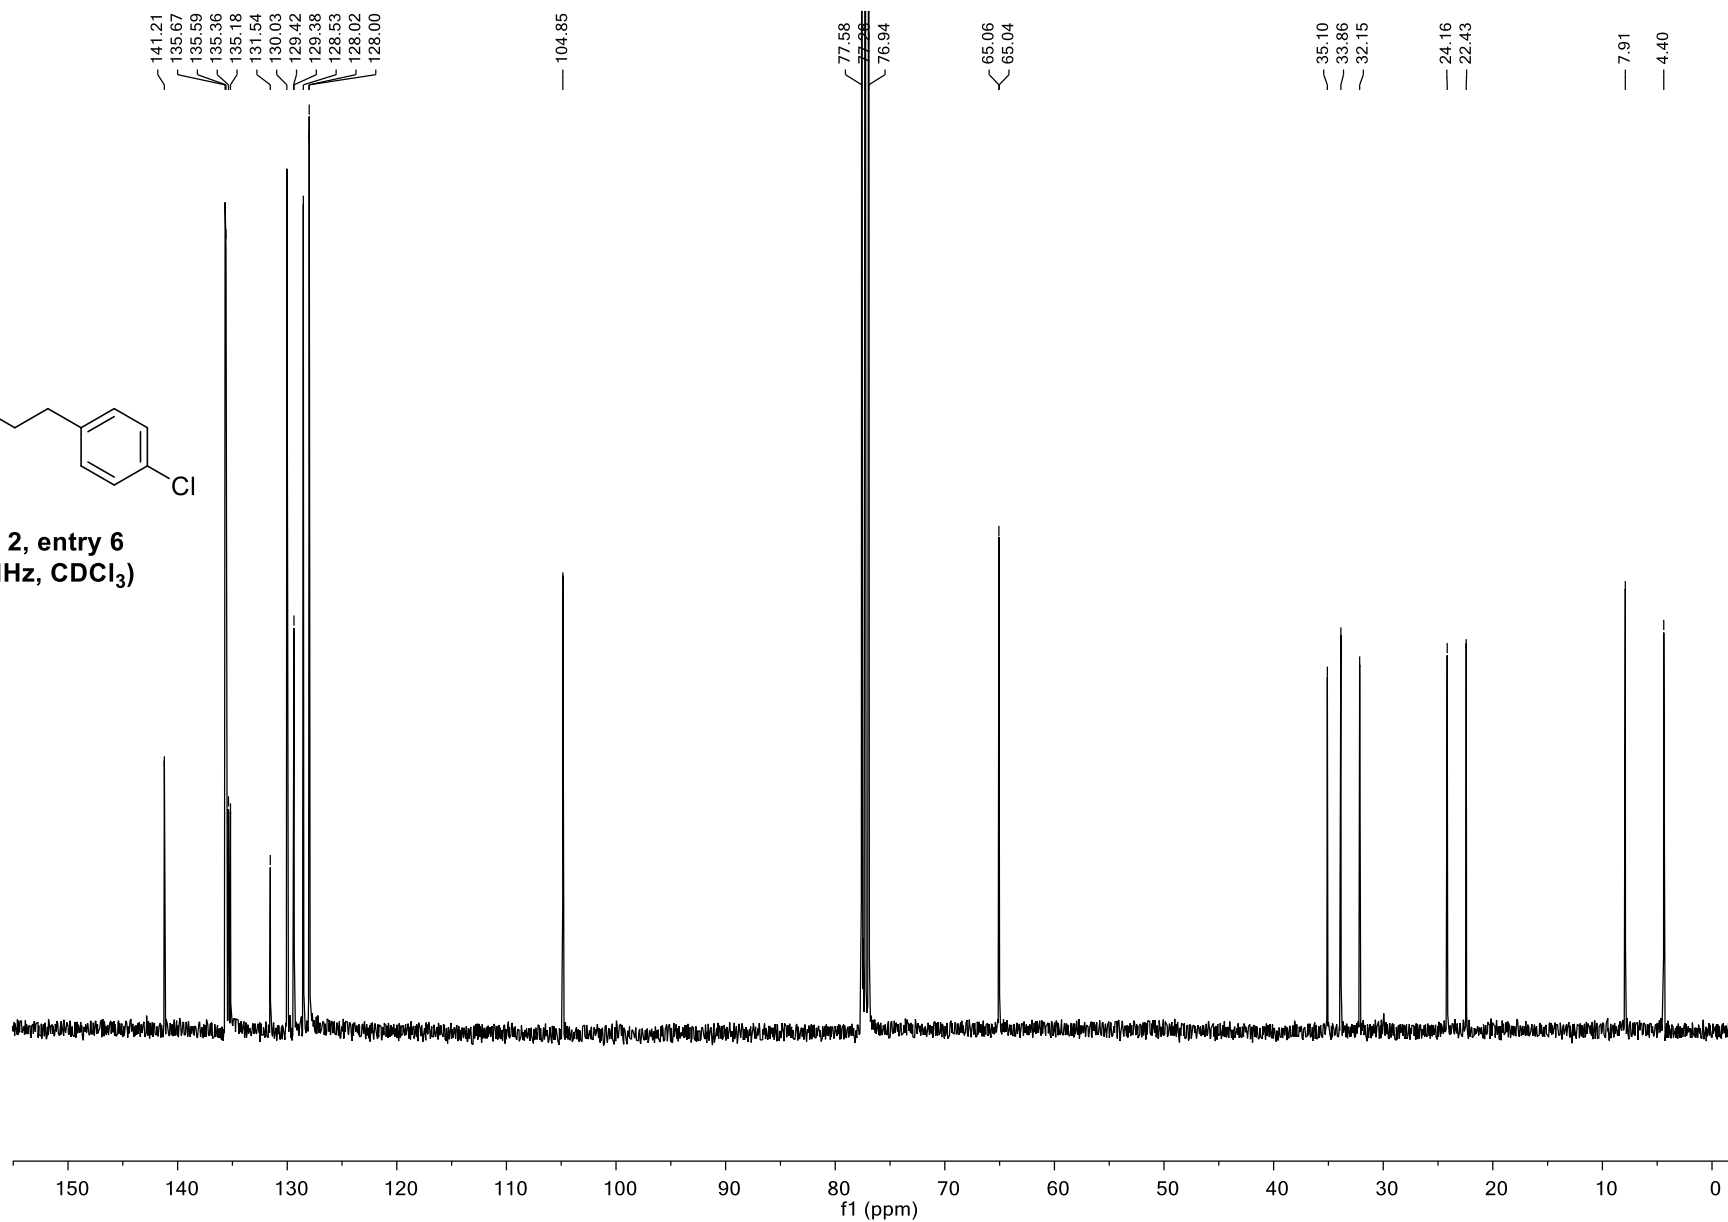

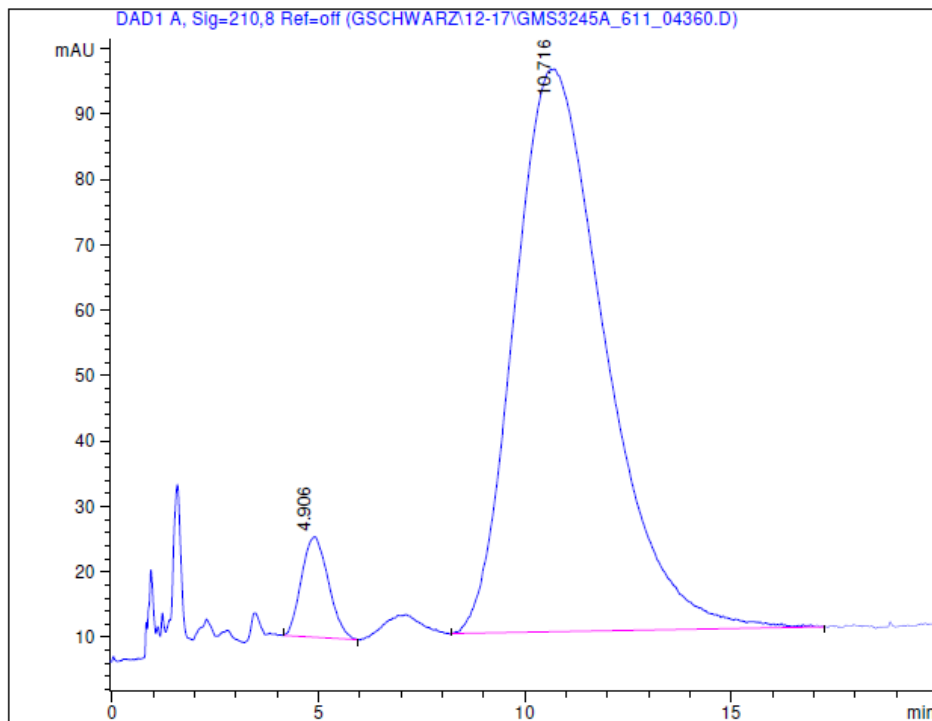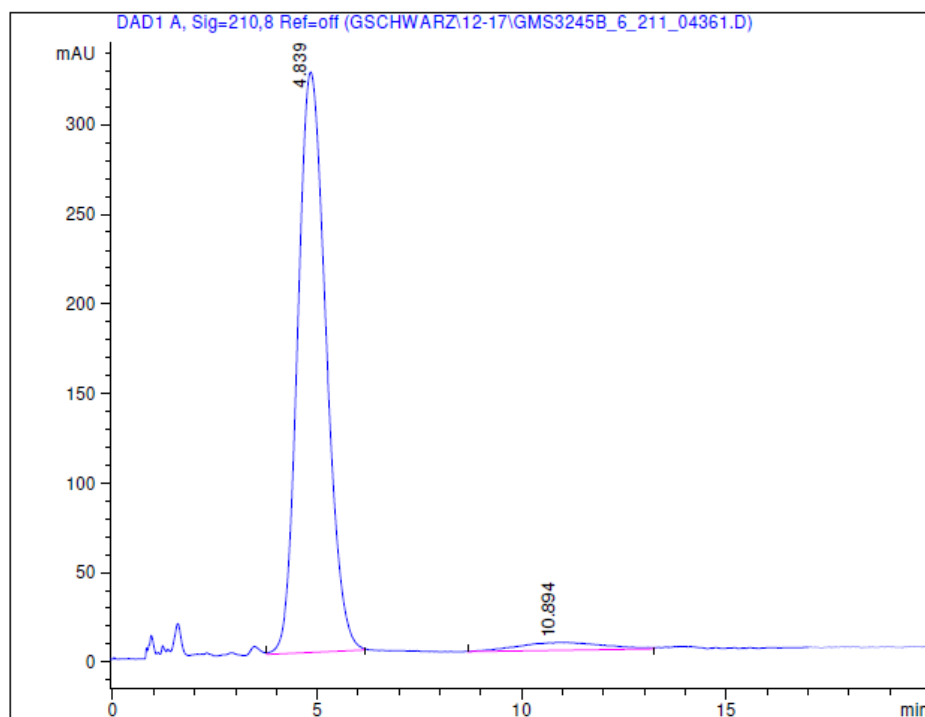

Signal 1:DAD1 A, Sig=210,8 Ref=off

| Peak # | RT [min] | Width [min] | Area  | Area % |
|--------|----------|-------------|-------|--------|
| 1      | 4.91     | 0.75        | 696   | 5.04   |
| 2      | 10.72    | 2.54        | 13120 | 94.96  |

Signal 1:DAD1 A, Sig=210,8 Ref=off

| Peak # | RT [min] | Width [min] | Area  | Area % |
|--------|----------|-------------|-------|--------|
| 1      | 4.84     | 0.74        | 15527 | 95.96  |
| 2      | 10.89    | 2.45        | 654   | 4.04   |

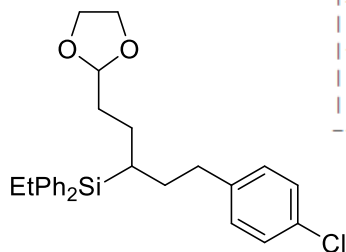

**Table 2, entry 6**

SFC: CHIRALCEL OJ column (35% 2-PrOH in supercritical CO<sub>2</sub>, 3.5 mL/min)

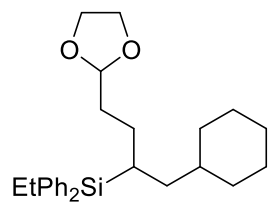

Table 2, entry 7  
(400 MHz, CDCl<sub>3</sub>)

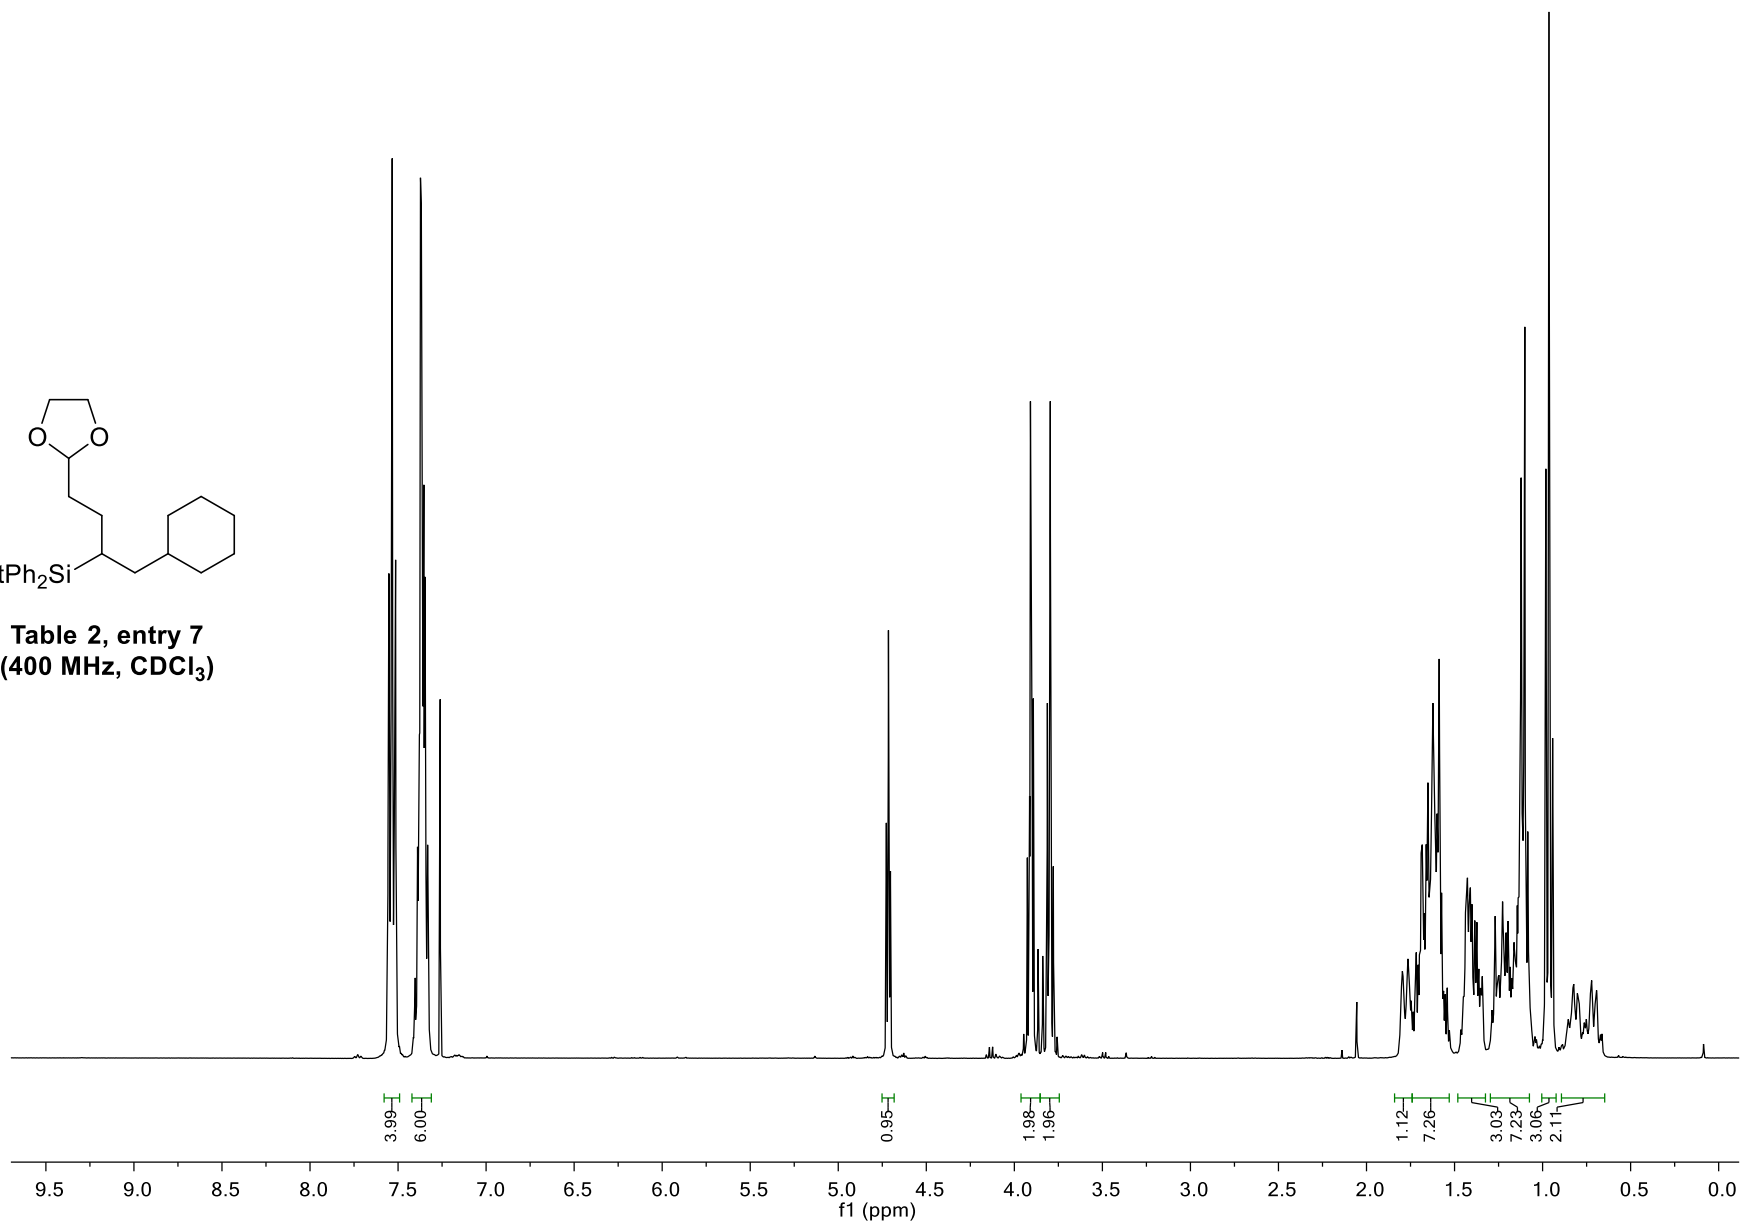

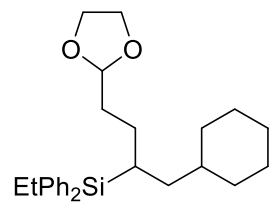

Table 2, entry 7  
(101 MHz, CDCl<sub>3</sub>)

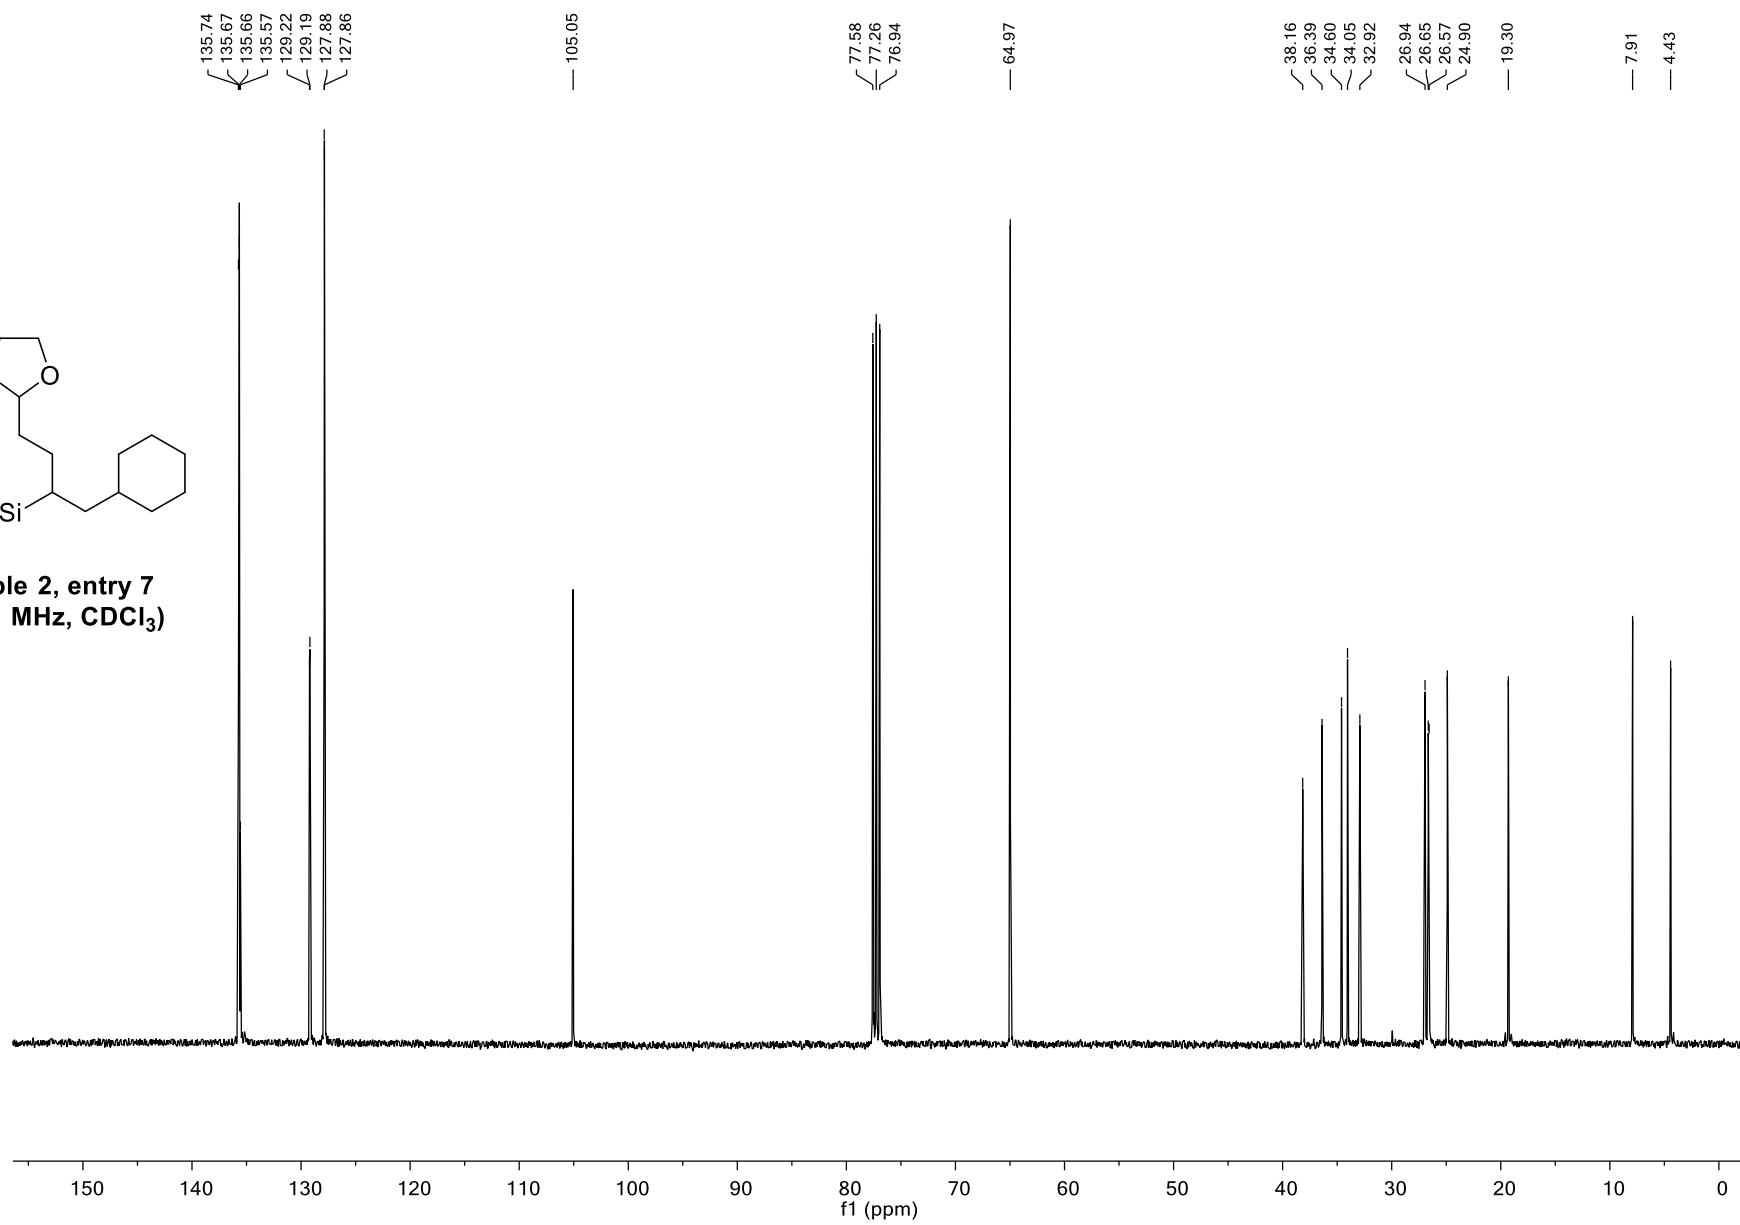

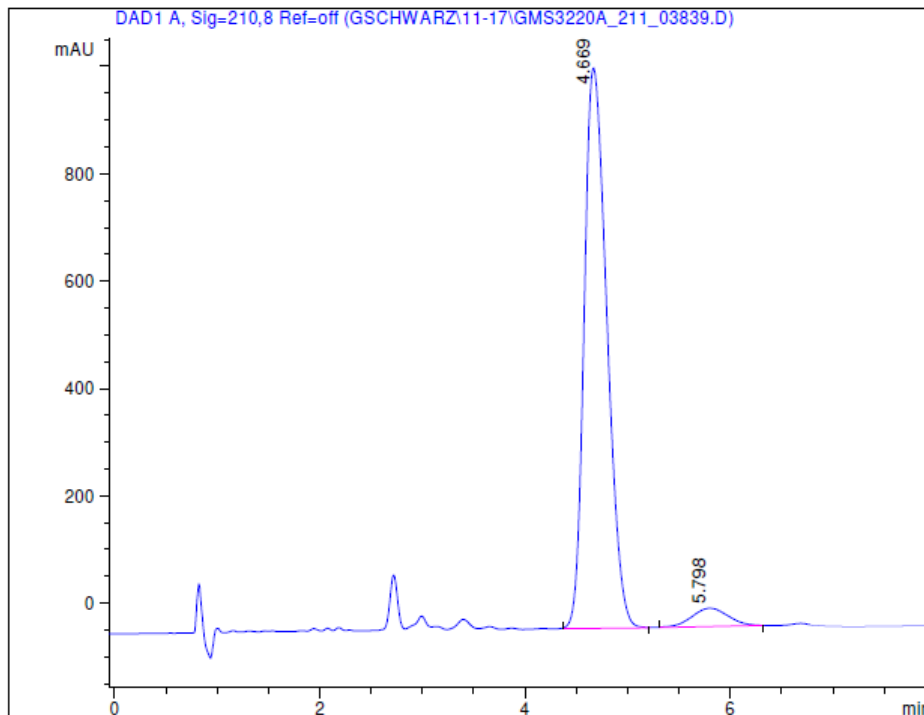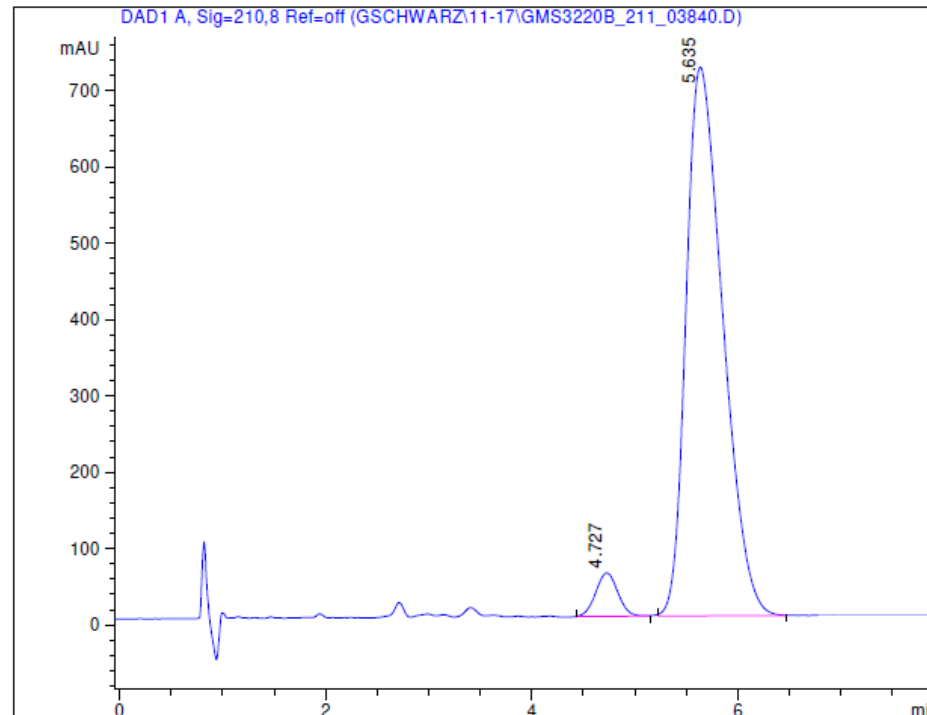

Signal 1:DAD1 A, Sig=210,8 Ref=off

| Peak # | RT [min] | Width [min] | Area  | Area % |
|--------|----------|-------------|-------|--------|
| 1      | 4.67     | 0.24        | 16035 | 95.02  |
| 2      | 5.80     | 0.41        | 840   | 4.98   |

Signal 1:DAD1 A, Sig=210,8 Ref=off

| Peak # | RT [min] | Width [min] | Area  | Area % |
|--------|----------|-------------|-------|--------|
| 1      | 4.73     | 0.23        | 849   | 4.57   |
| 2      | 5.63     | 0.38        | 17728 | 95.43  |

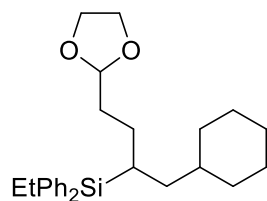

**Table 2, entry 7**

**SFC:** CHIRALCEL OJ column (5% 2-PrOH in supercritical CO<sub>2</sub>, 3.5 mL/min)



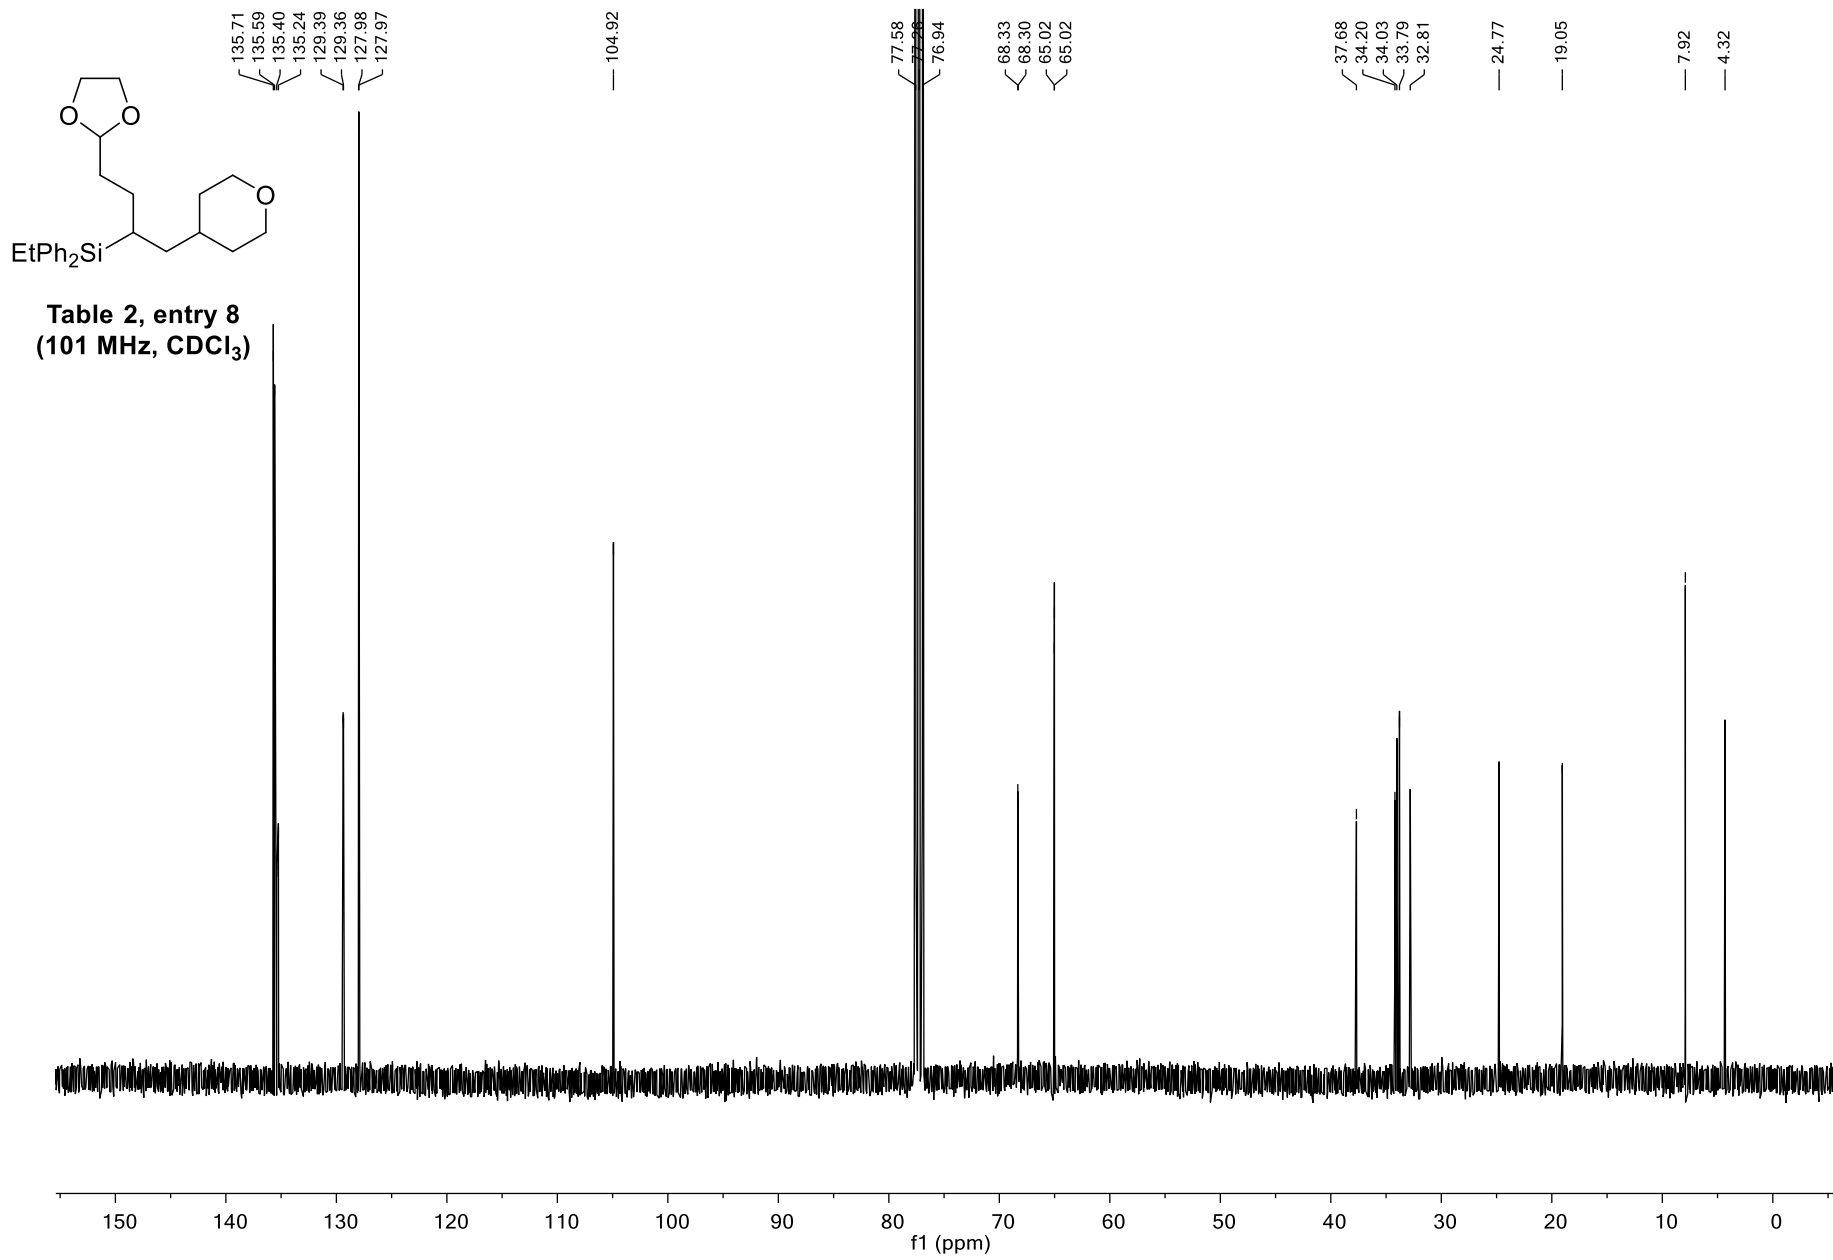



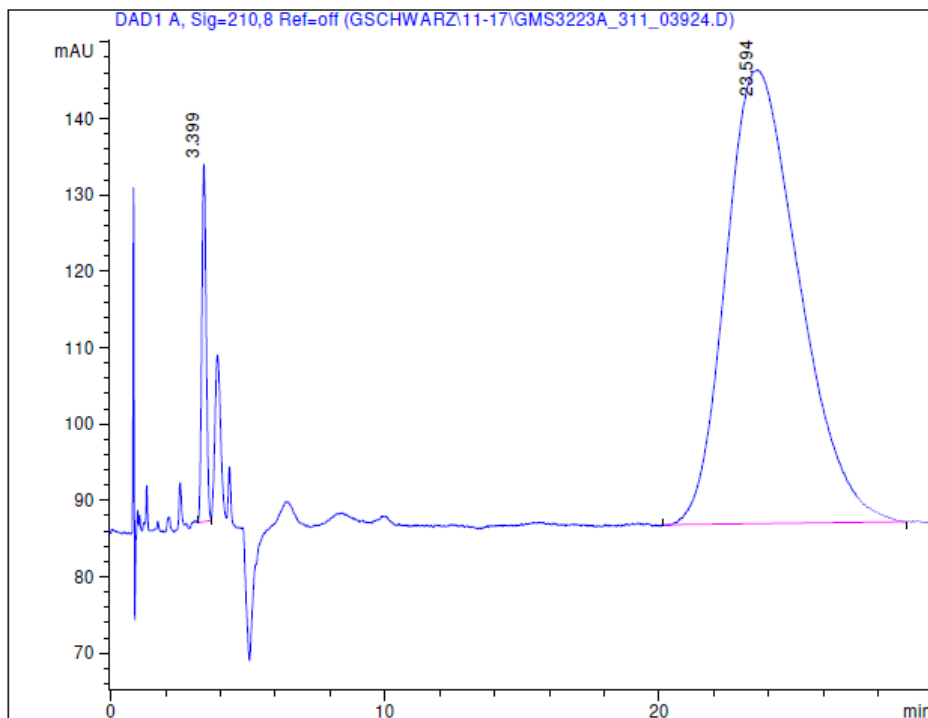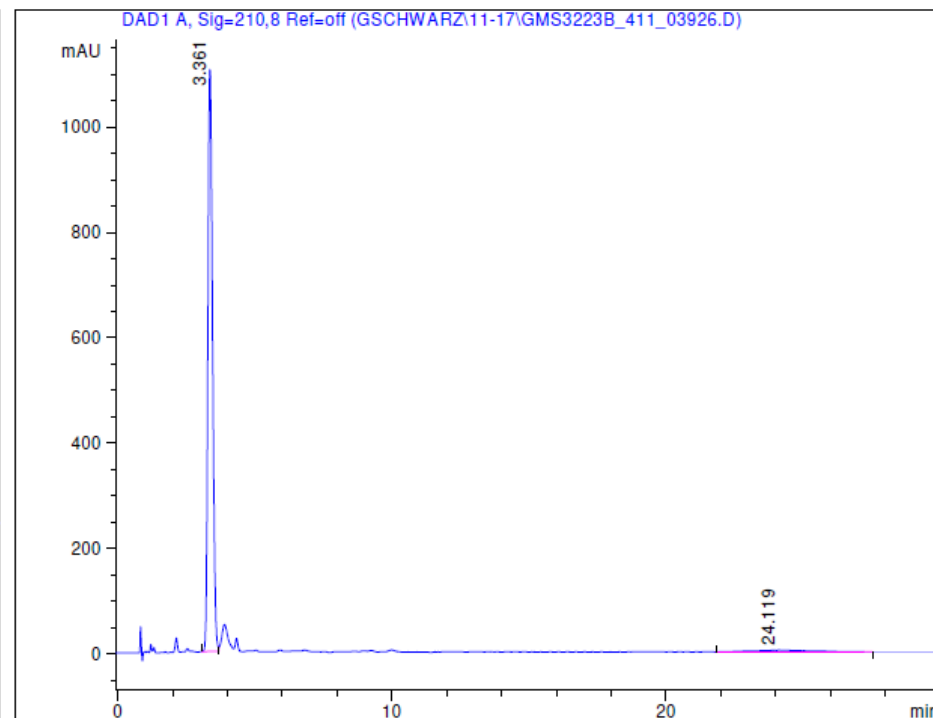

Signal 1:DAD1 A, Sig=210,8 Ref=off

| Peak # | RT [min] | Width [min] | Area  | Area % |
|--------|----------|-------------|-------|--------|
| 1      | 3.40     | 0.18        | 517   | 4.49   |
| 2      | 23.59    | 3.08        | 10992 | 95.51  |

Signal 1:DAD1 A, Sig=210,8 Ref=off

| Peak # | RT [min] | Width [min] | Area  | Area % |
|--------|----------|-------------|-------|--------|
| 1      | 3.36     | 0.19        | 12880 | 95.93  |
| 2      | 24.12    | 2.50        | 547   | 4.07   |

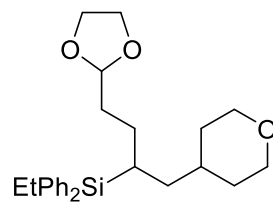

**Table 2, entry 8**

**SFC:** CHIRALCEL OJ column (10% 2-PrOH in supercritical CO<sub>2</sub>, 3.5 mL/min)

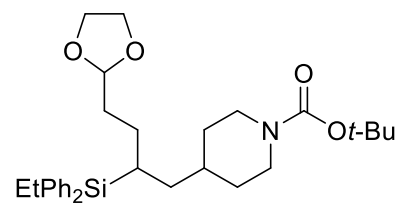

Table 2, entry 9  
(500 MHz,  $d_6$ -DMSO, 75 °C)

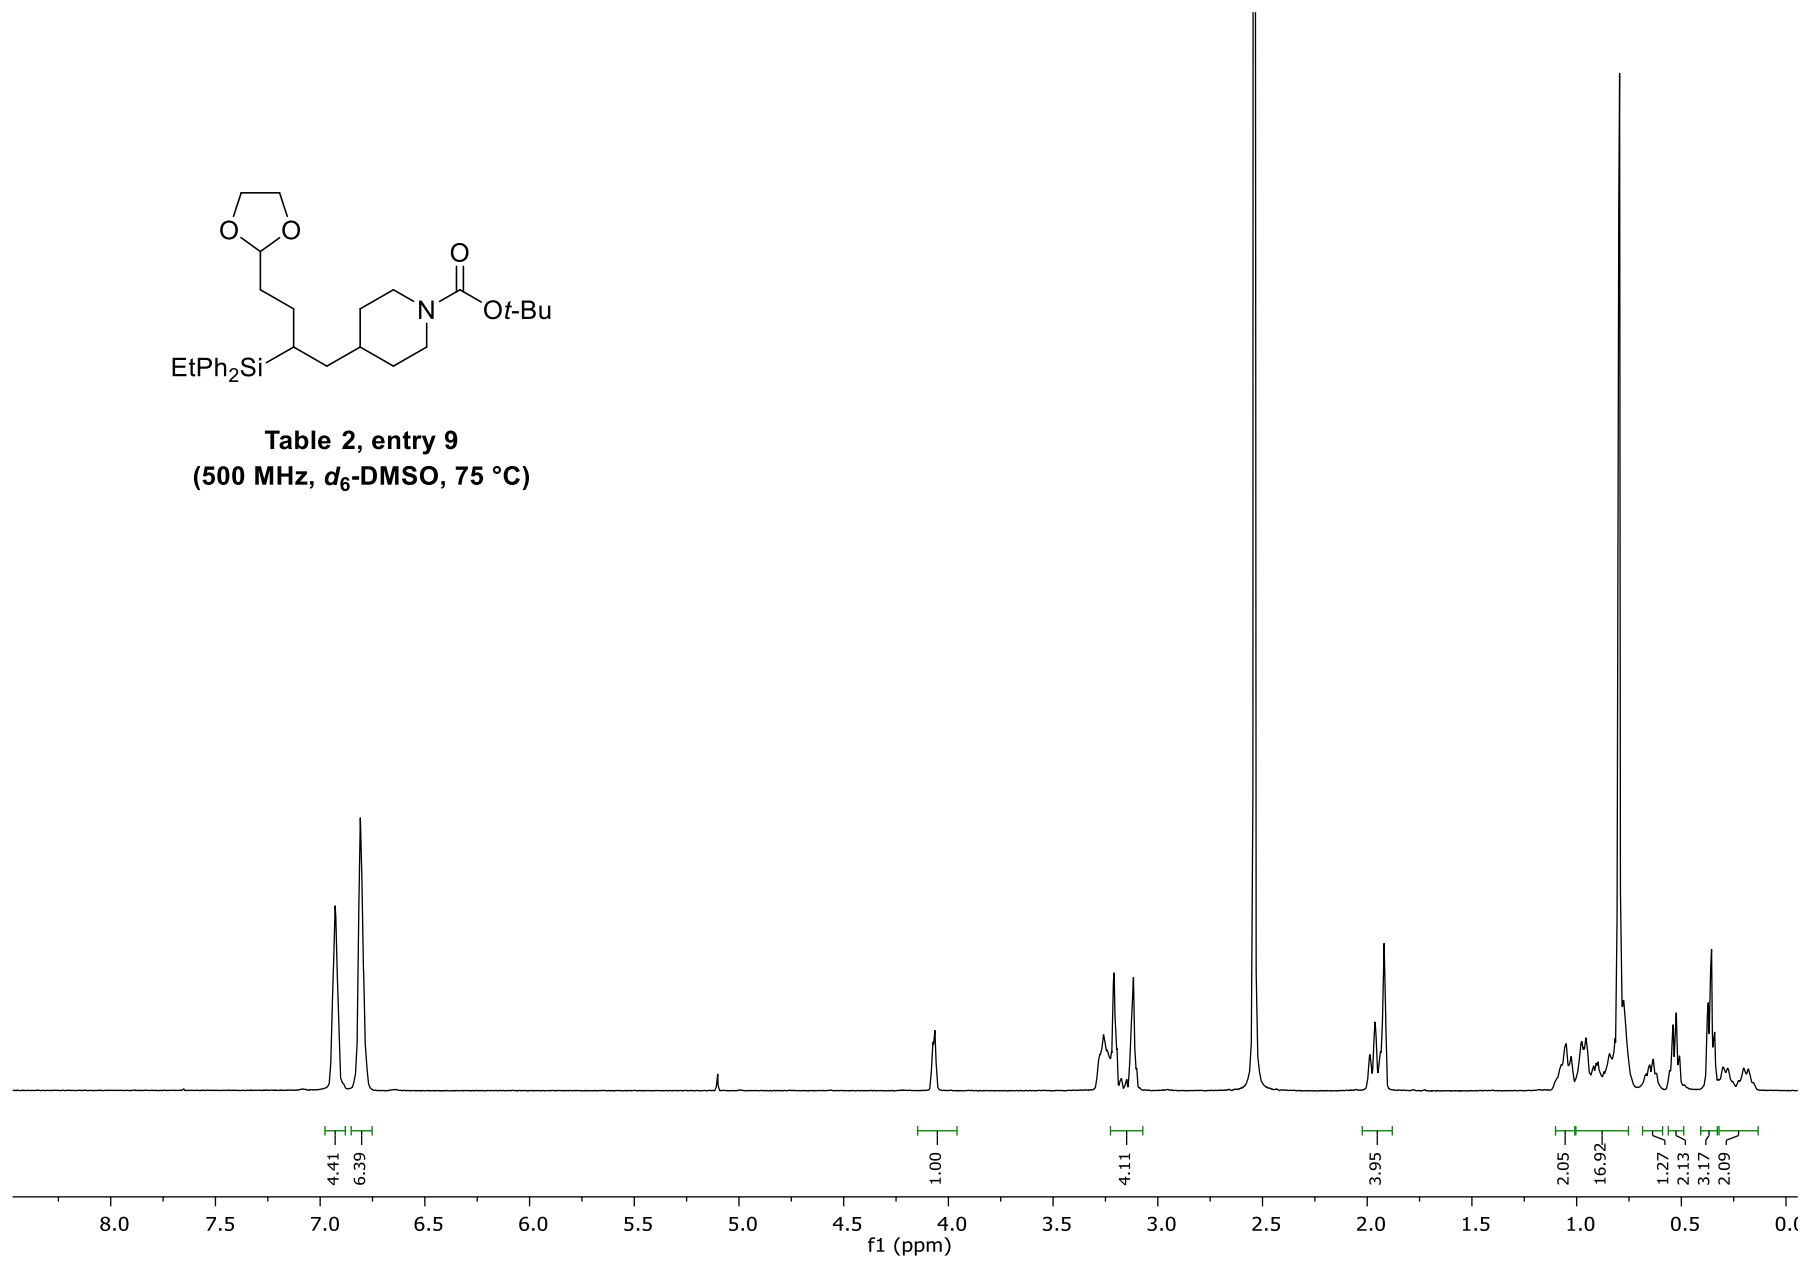

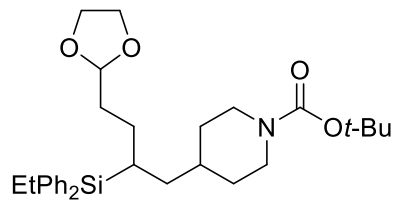

Table 2, entry 9  
(126 MHz,  $d_6$ -DMSO, 75 °C)

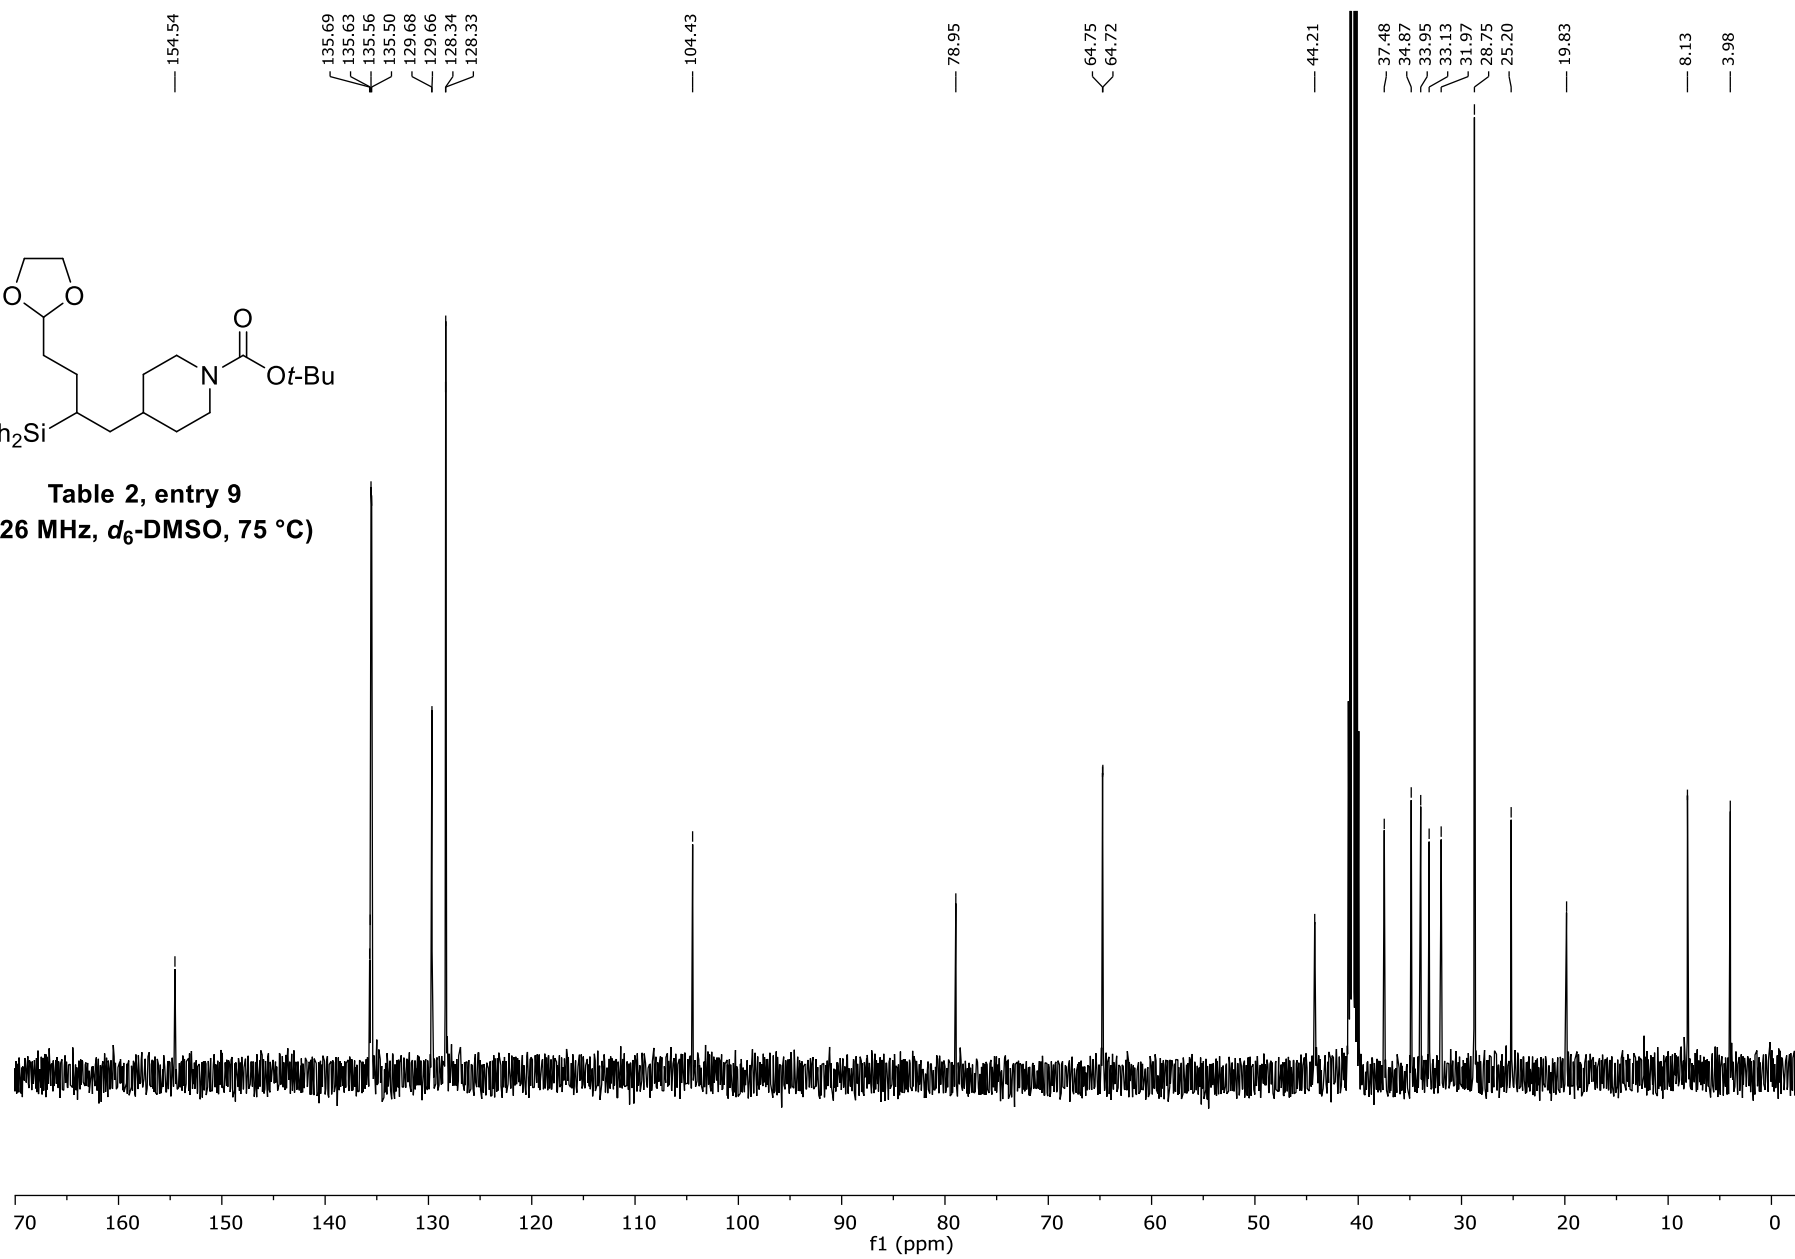

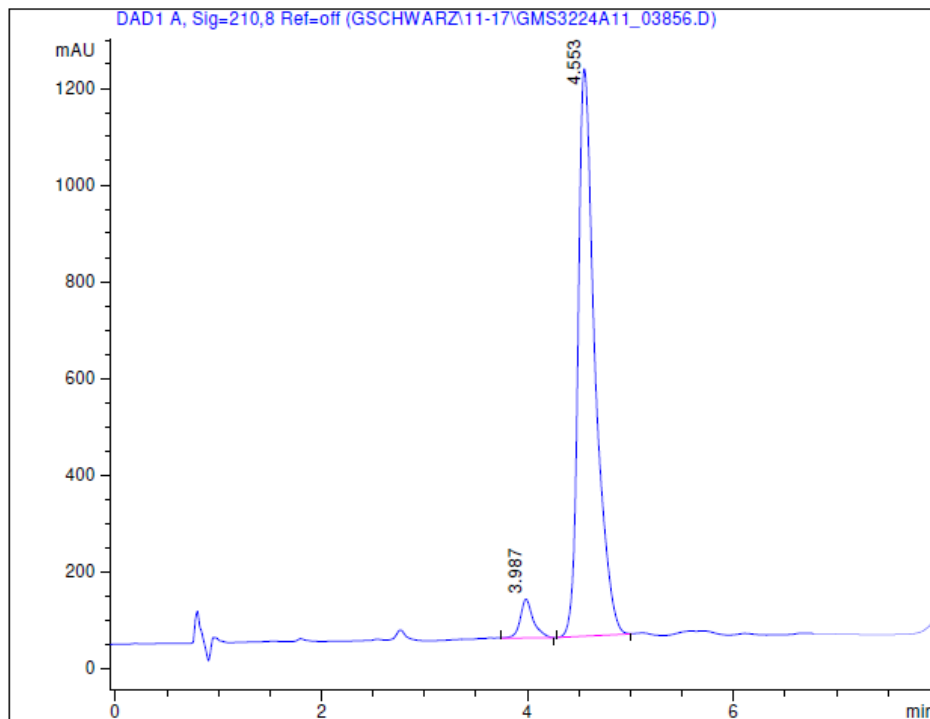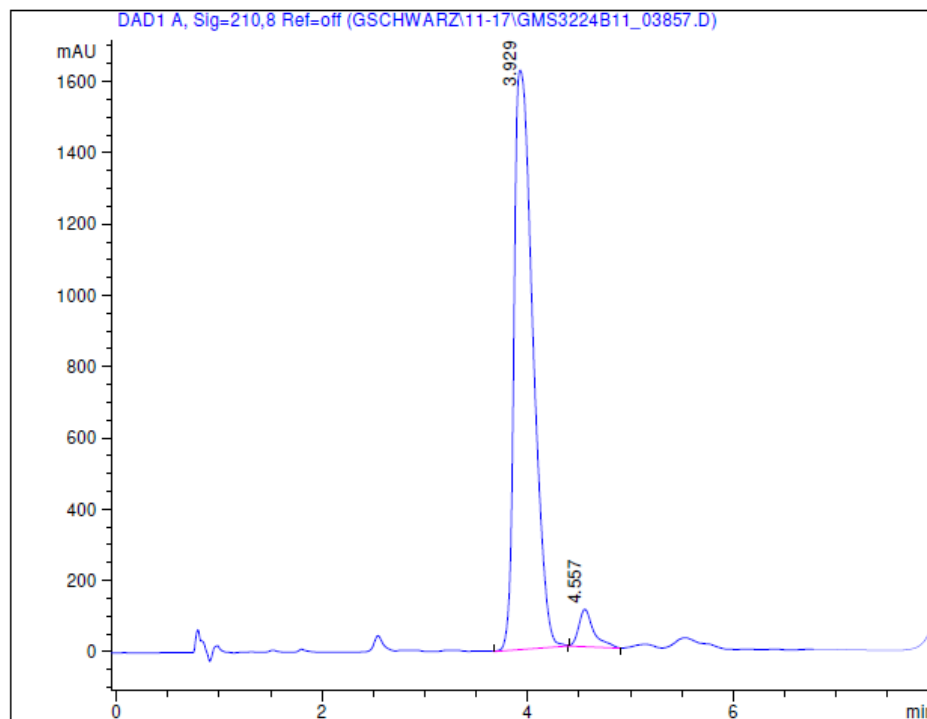

Signal 1:DAD1 A, Sig=210,8 Ref=off

| Peak # | RT [min] | Width [min] | Area  | Area % |
|--------|----------|-------------|-------|--------|
| 1      | 3.99     | 0.15        | 702   | 4.98   |
| 2      | 4.55     | 0.19        | 13392 | 95.02  |

Signal 1:DAD1 A, Sig=210,8 Ref=off

| Peak # | RT [min] | Width [min] | Area  | Area % |
|--------|----------|-------------|-------|--------|
| 1      | 3.93     | 0.21        | 20680 | 95.14  |
| 2      | 4.56     | 0.17        | 1057  | 4.86   |

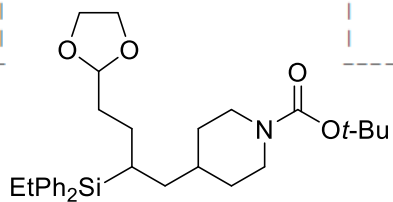

**Table 2, entry 9**

**SFC:** CHIRALPAK AD-H column (10% 2-PrOH in supercritical CO<sub>2</sub>, 3.5 mL/min)

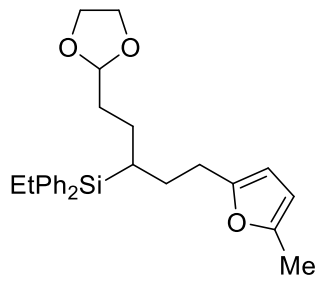

Table 2, entry 10  
(400 MHz, CDCl<sub>3</sub>)

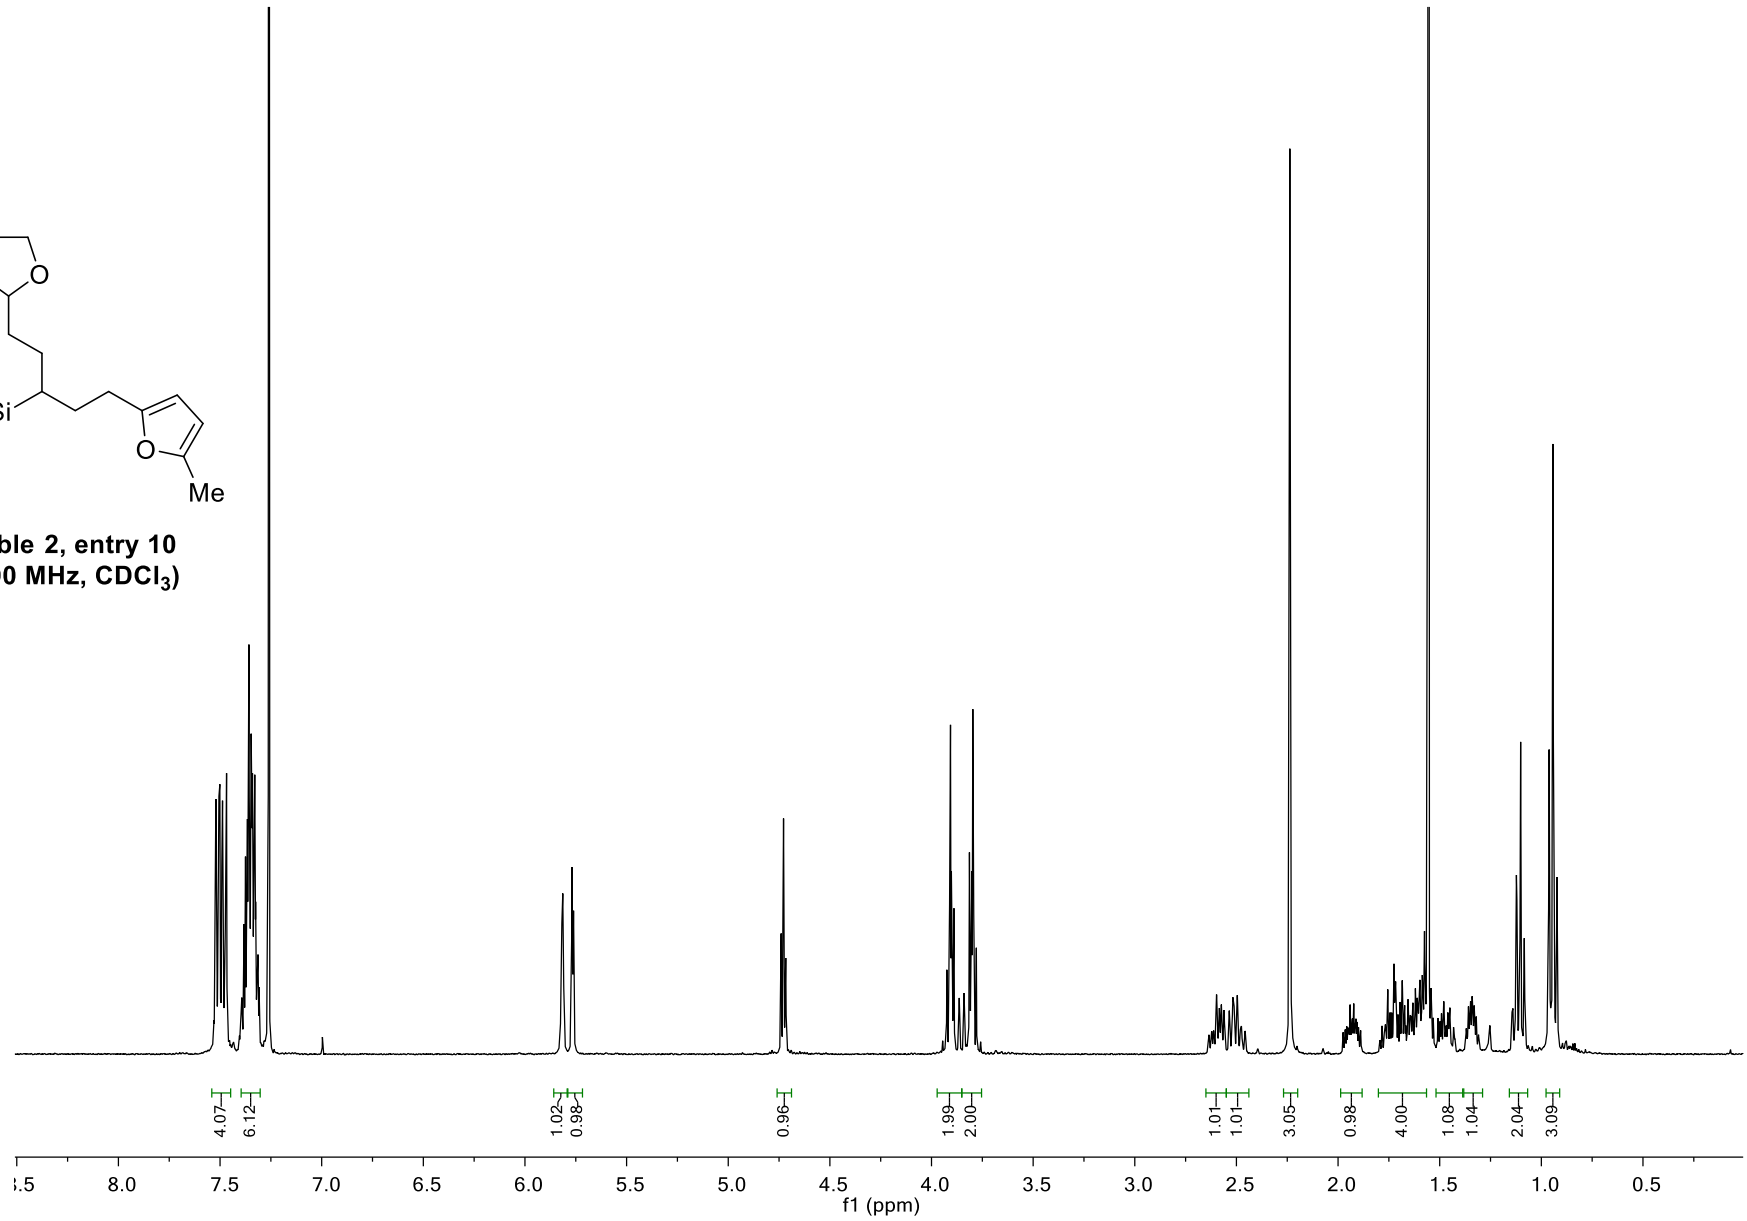



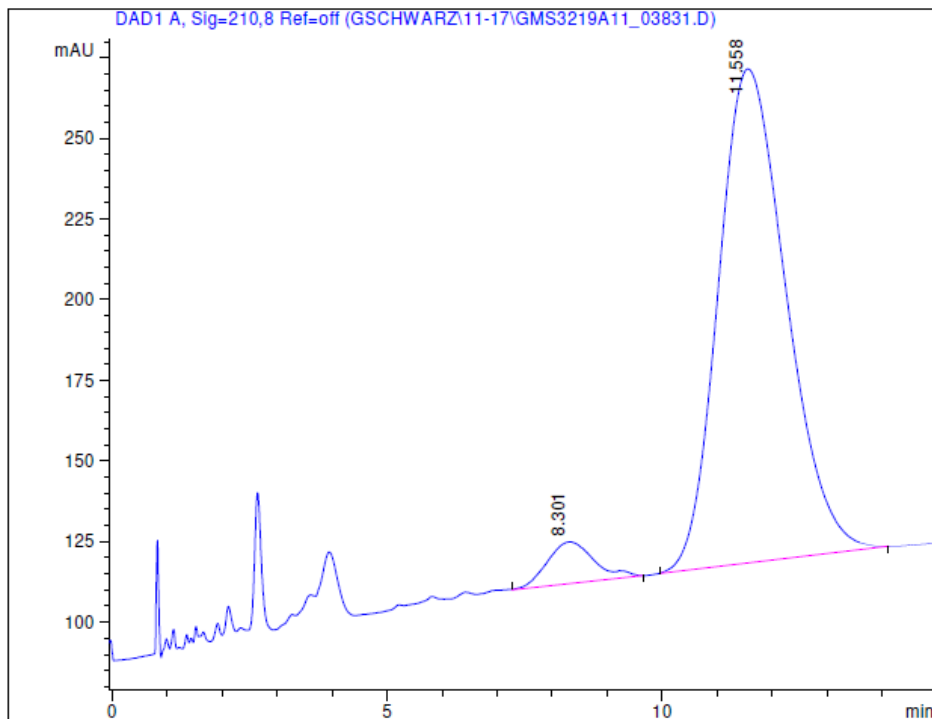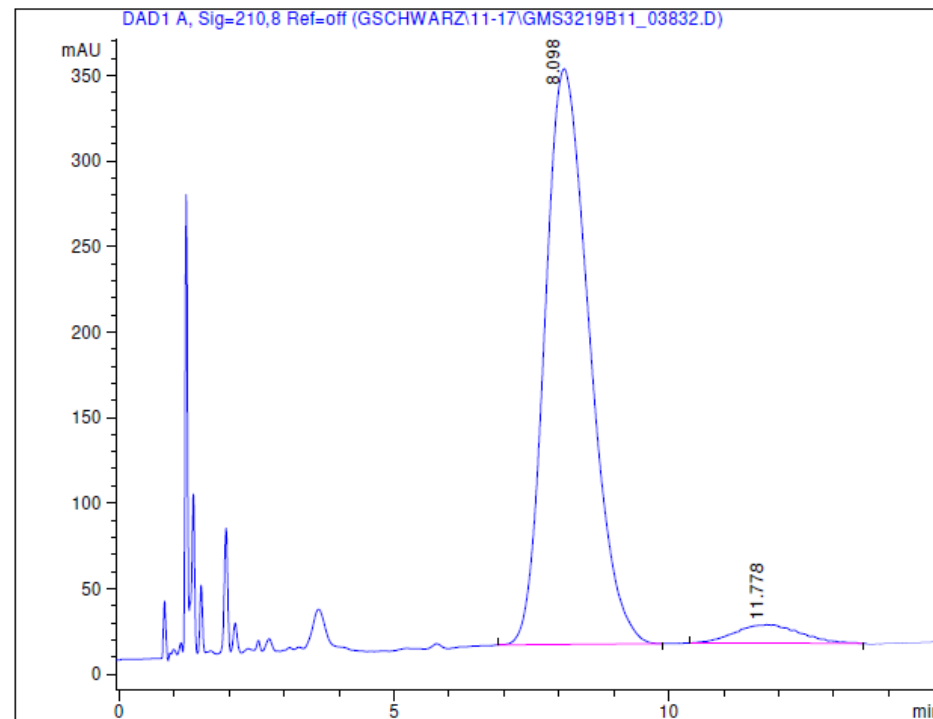

Signal 1:DAD1 A, Sig=210,8 Ref=off

| Peak # | RT [min] | Width [min] | Area  | Area % |
|--------|----------|-------------|-------|--------|
| 1      | 8.30     | 0.98        | 762   | 5.50   |
| 2      | 11.56    | 1.43        | 13106 | 94.50  |

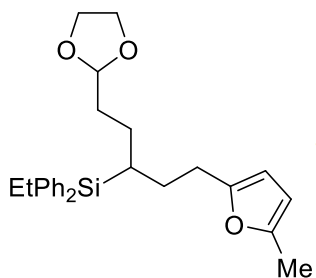

Signal 1:DAD1 A, Sig=210,8 Ref=off

| Peak # | RT [min] | Width [min] | Area  | Area % |
|--------|----------|-------------|-------|--------|
| 1      | 8.10     | 0.93        | 18863 | 95.49  |
| 2      | 11.78    | 1.37        | 892   | 4.51   |

**Table 2, entry 10**  
**SFC:** CHIRALCEL OJ column (15% 2-PrOH in supercritical CO<sub>2</sub>, 3.5 mL/min)





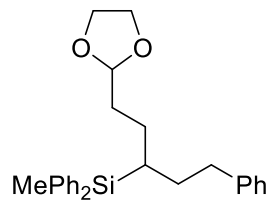

Table 2, entry 11  
(101 MHz, CDCl<sub>3</sub>)

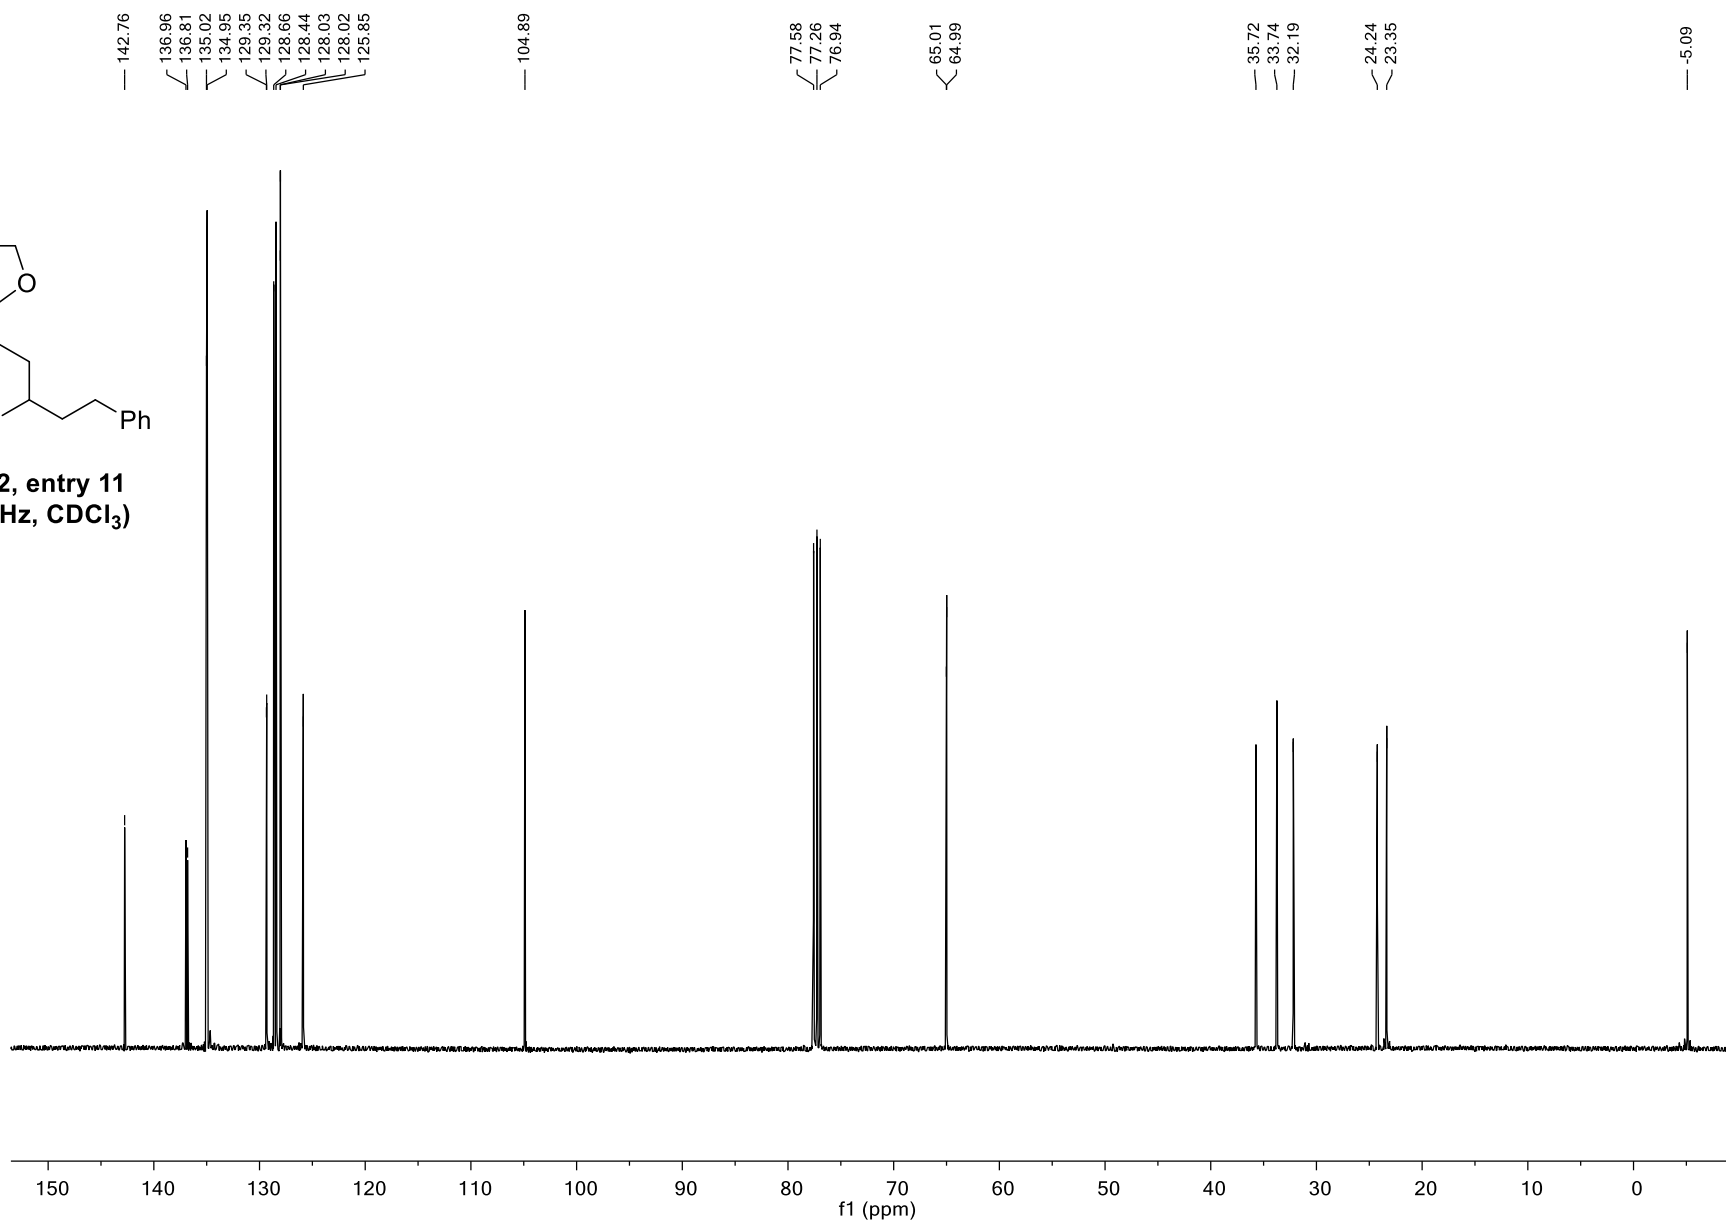

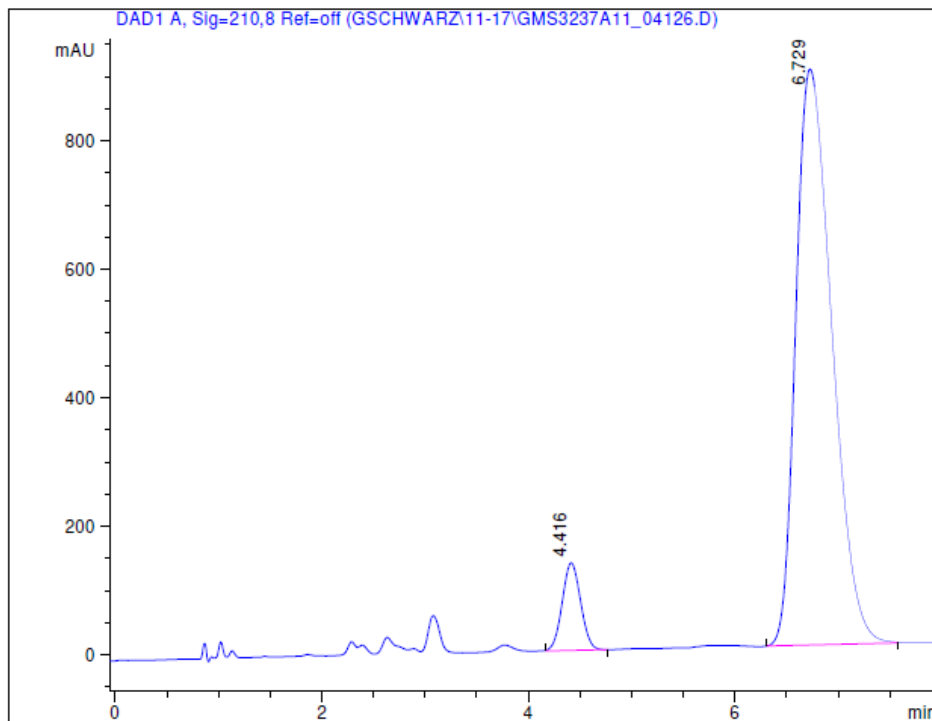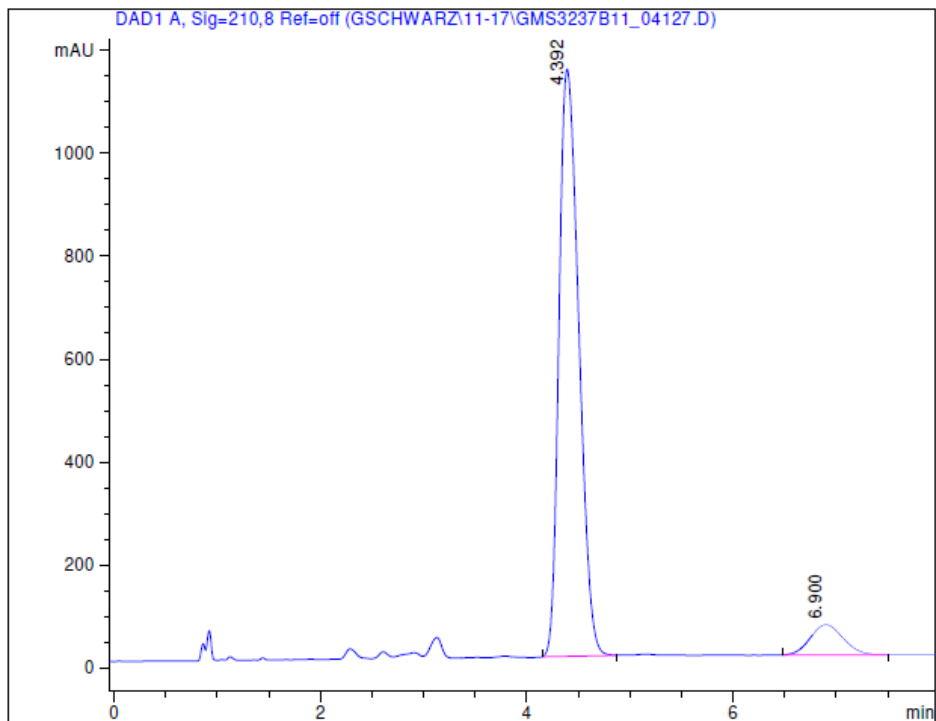

Signal 1:DAD1 A, Sig=210,8 Ref=off

| Peak # | RT [min] | Width [min] | Area  | Area % |
|--------|----------|-------------|-------|--------|
| 1      | 4.42     | 0.20        | 1690  | 7.22   |
| 2      | 6.73     | 0.38        | 21711 | 92.78  |

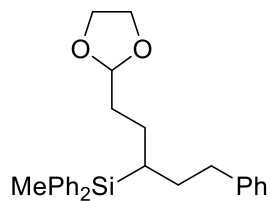

Signal 1:DAD1 A, Sig=210,8 Ref=off

| Peak # | RT [min] | Width [min] | Area  | Area % |
|--------|----------|-------------|-------|--------|
| 1      | 4.39     | 0.21        | 15193 | 92.03  |
| 2      | 6.90     | 0.35        | 1315  | 7.97   |

**Table 2, entry 11**

**SFC:** CHIRALCEL OJ column (15% 2-PrOH in supercritical CO<sub>2</sub>, 3.5 mL/min)

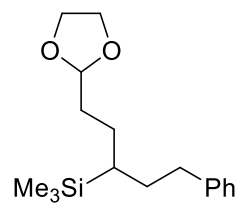

Table 2, entry 12  
(400 MHz, CDCl<sub>3</sub>)

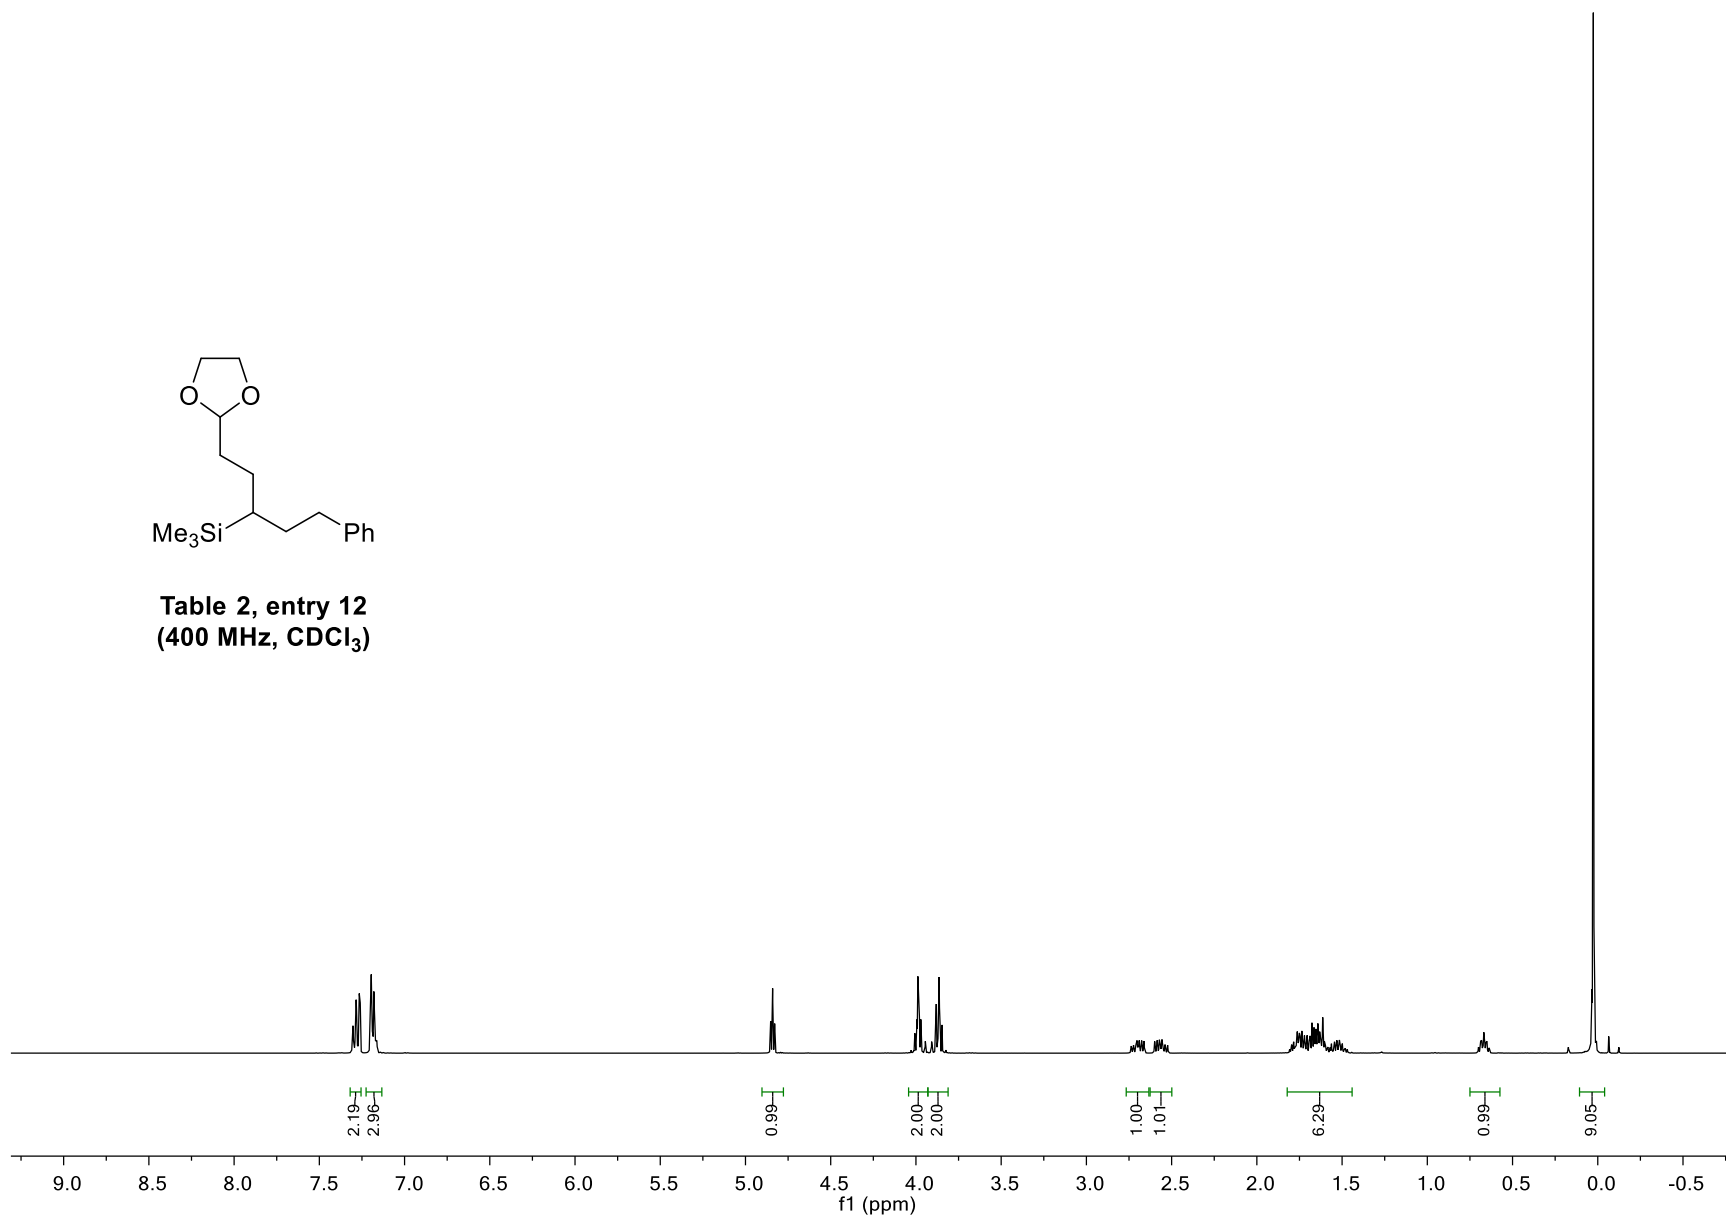

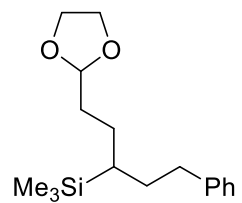

**Table 2, entry 12**  
**(101 MHz, CDCl<sub>3</sub>)**

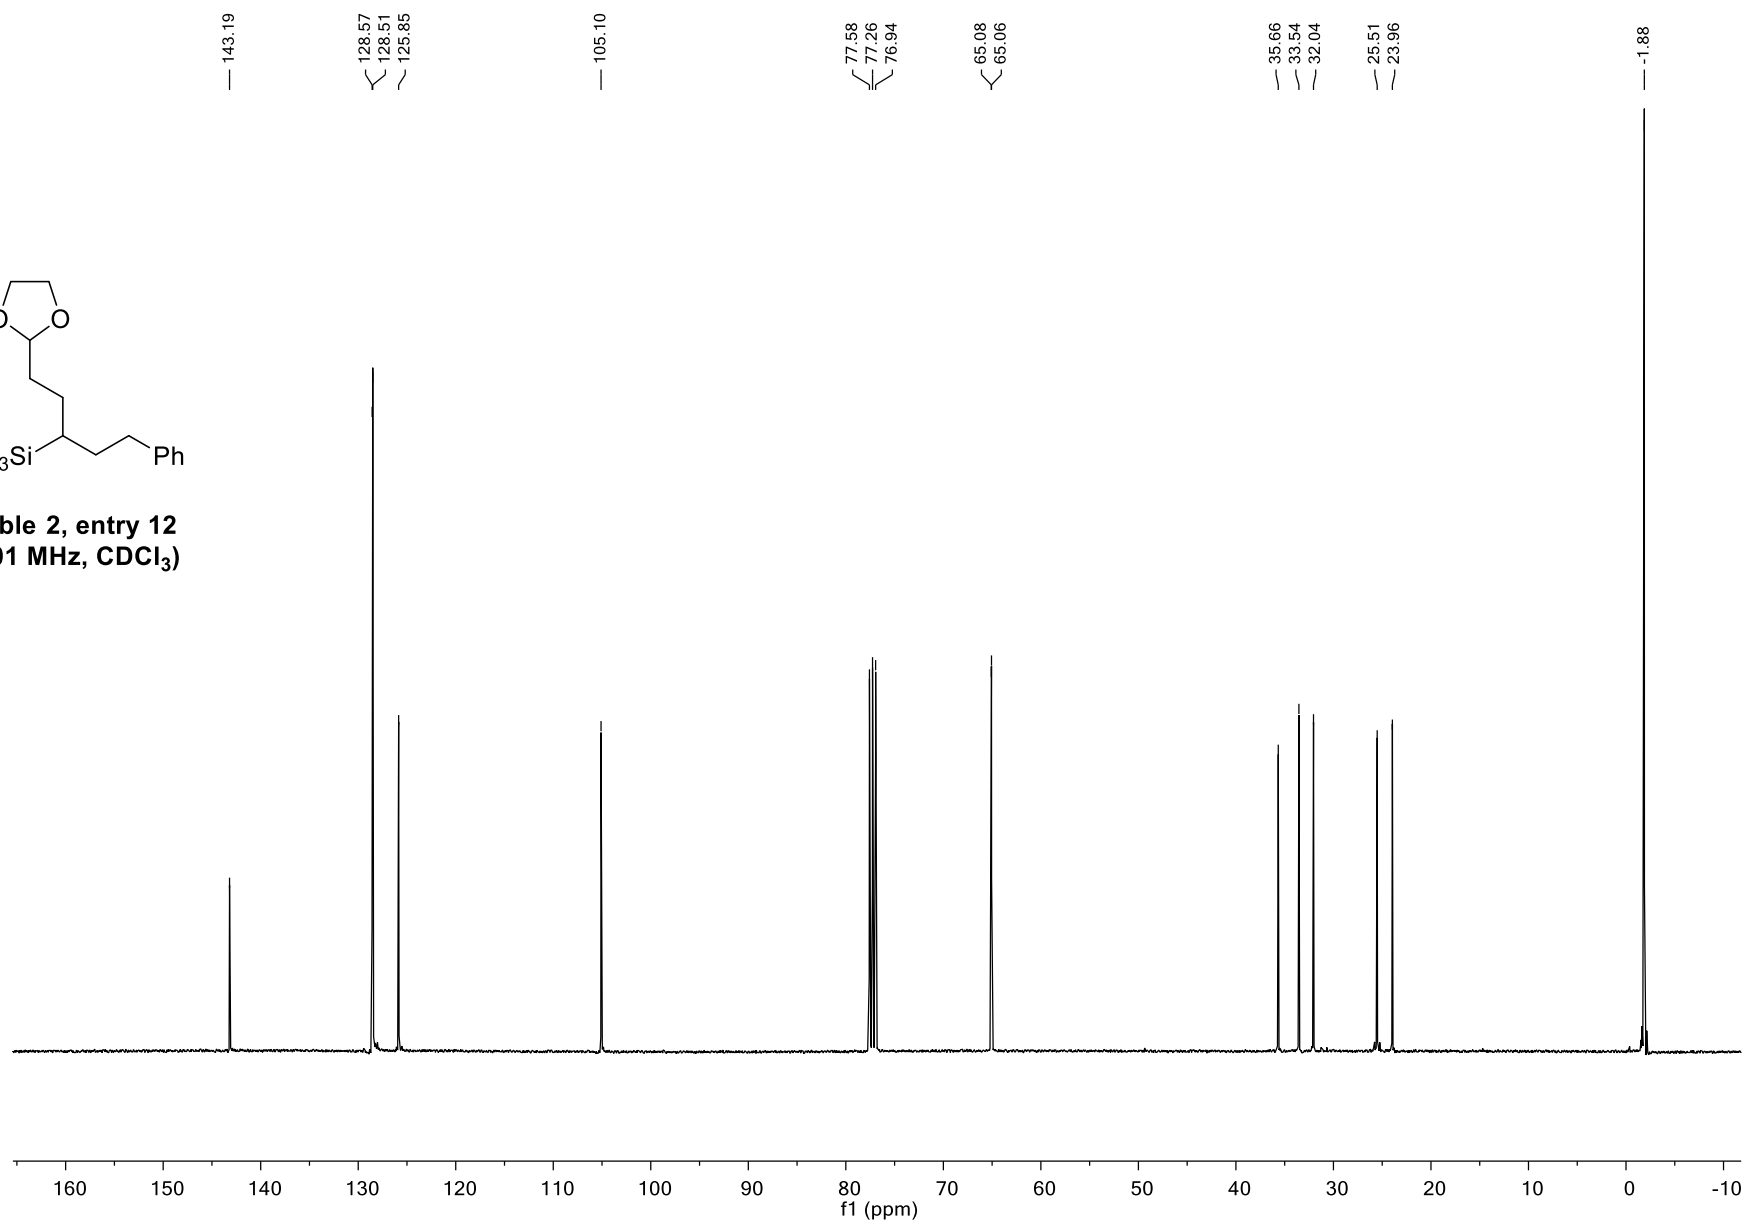

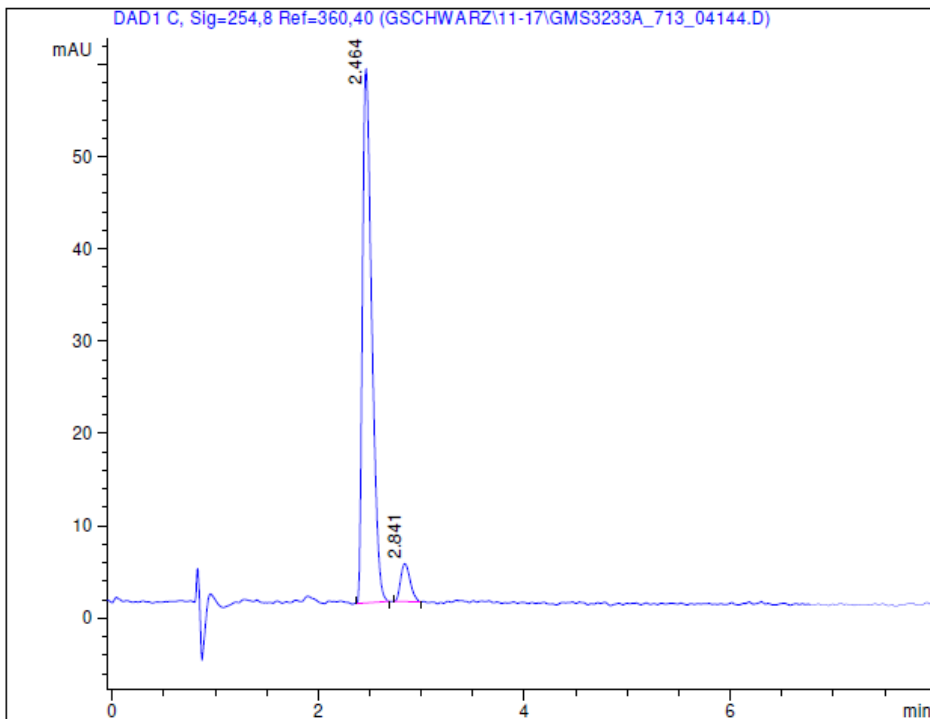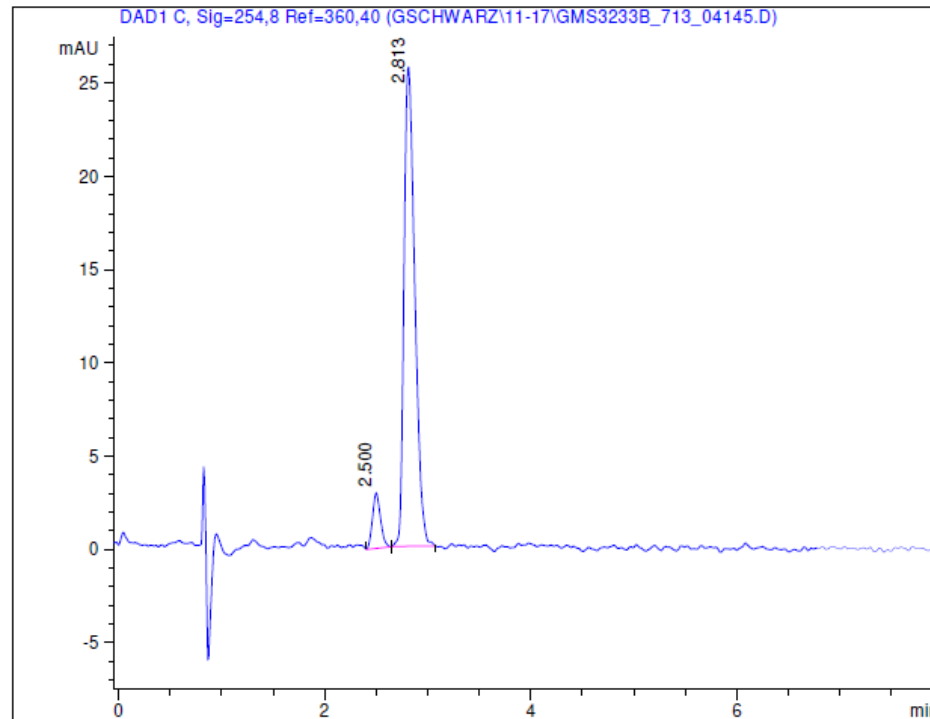

Signal 1:DAD1 C, Sig=254,8 Ref=360,40

| Peak # | RT [min] | Width [min] | Area | Area % |
|--------|----------|-------------|------|--------|
| 1      | 2.46     | 0.10        | 364  | 93.24  |
| 2      | 2.84     | 0.11        | 26   | 6.76   |

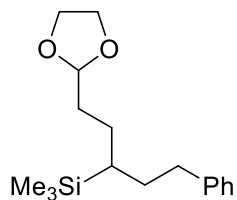

Signal 1:DAD1 C, Sig=254,8 Ref=360,40

| Peak # | RT [min] | Width [min] | Area | Area % |
|--------|----------|-------------|------|--------|
| 1      | 2.50     | 0.09        | 16   | 8.02   |
| 2      | 2.81     | 0.12        | 186  | 91.98  |

**Table 2, entry 12**  
**SFC:** CHIRALPAK AD-H column (2% 2-PrOH in supercritical CO<sub>2</sub>, 3.5 mL/min)

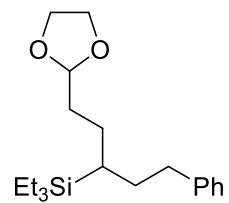

Table 2, entry 13  
(400 MHz, CDCl<sub>3</sub>)

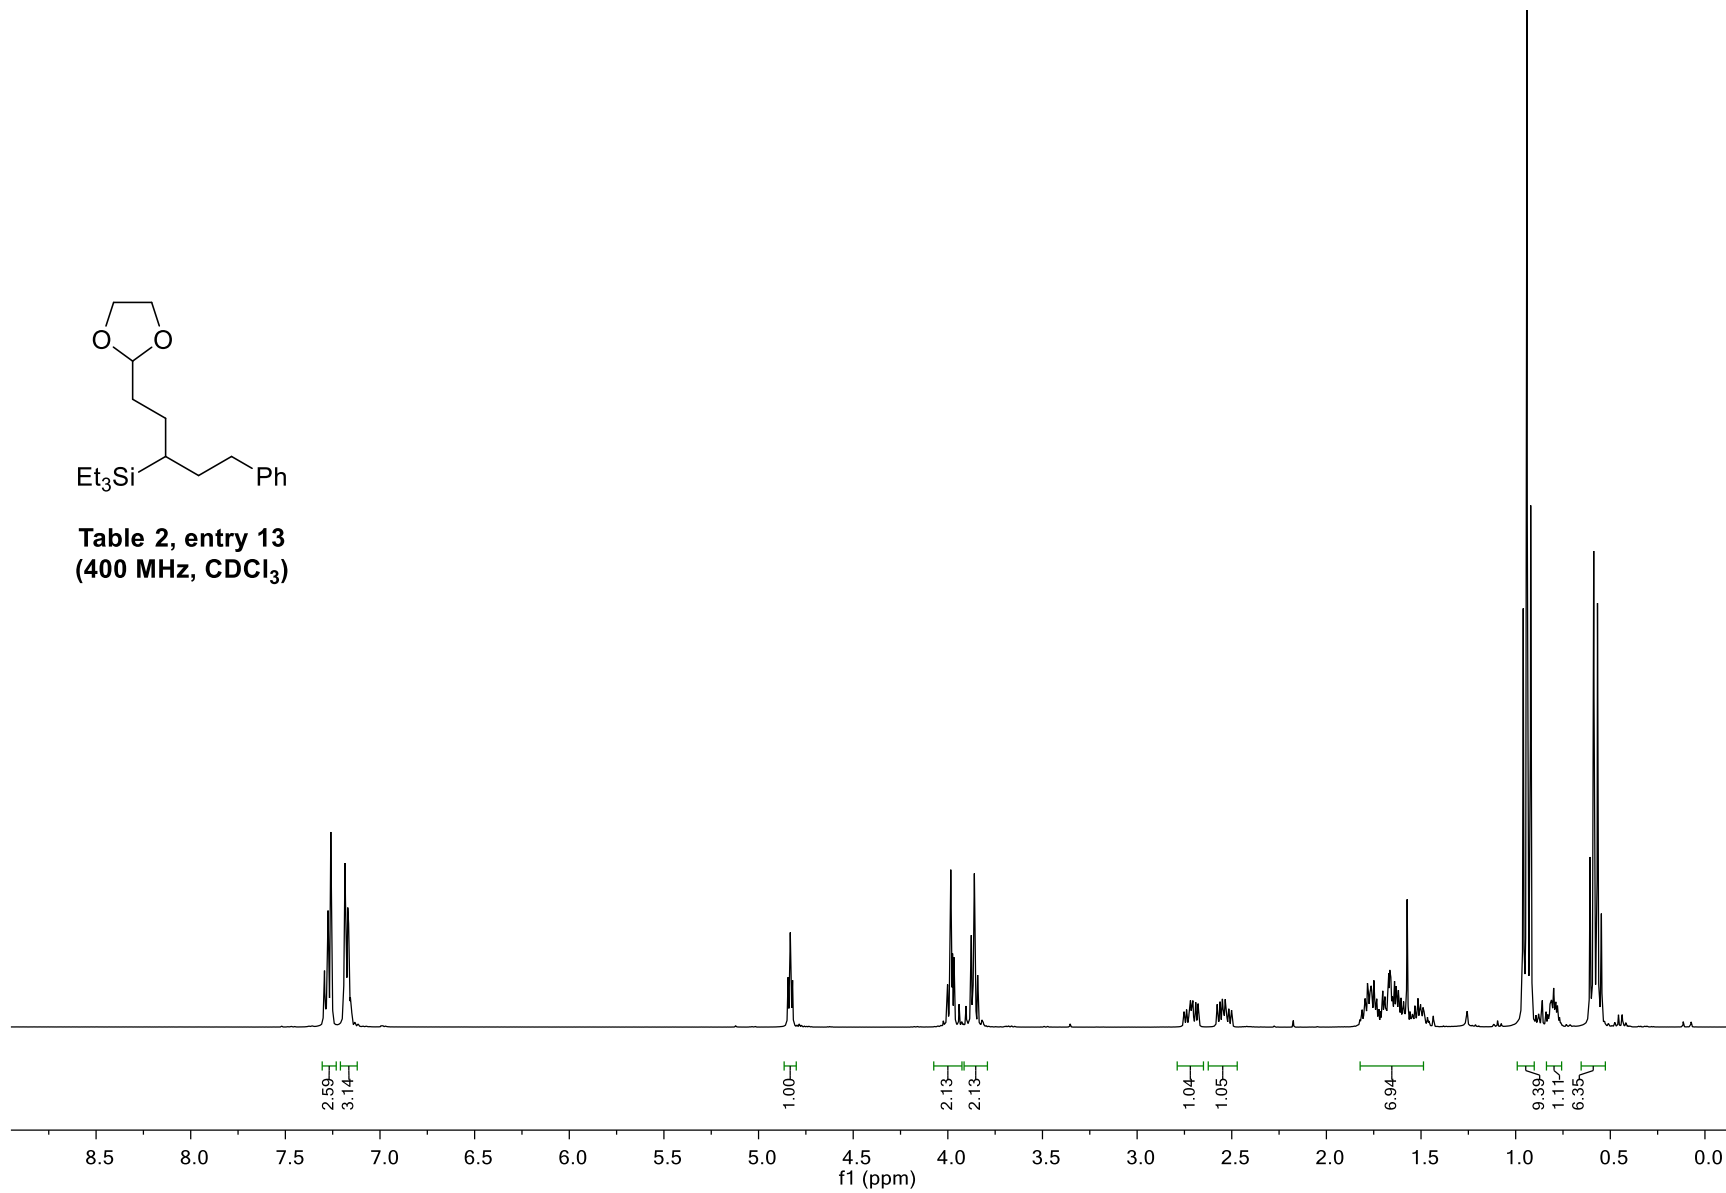

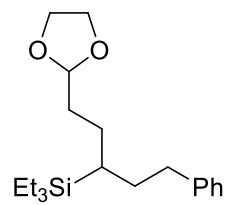

Table 2, entry 13  
(101 MHz, CDCl<sub>3</sub>)

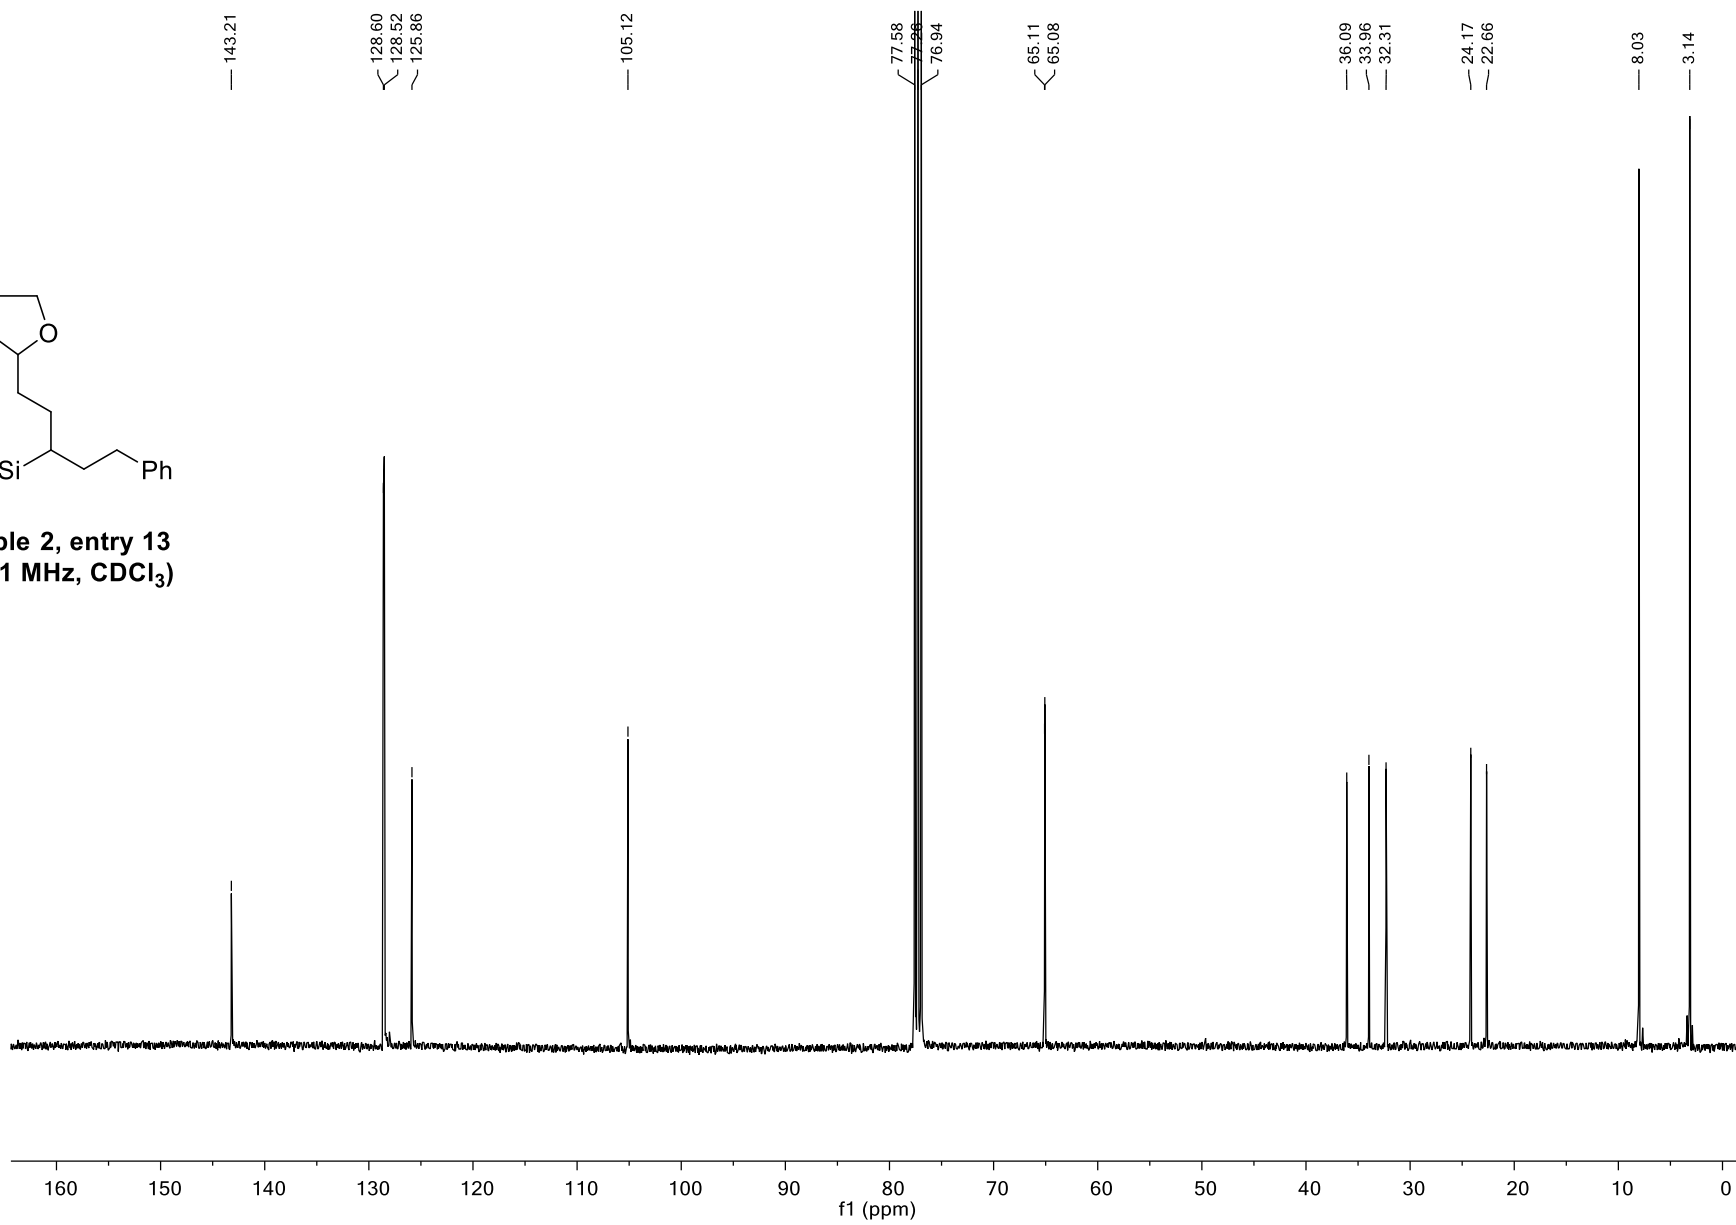

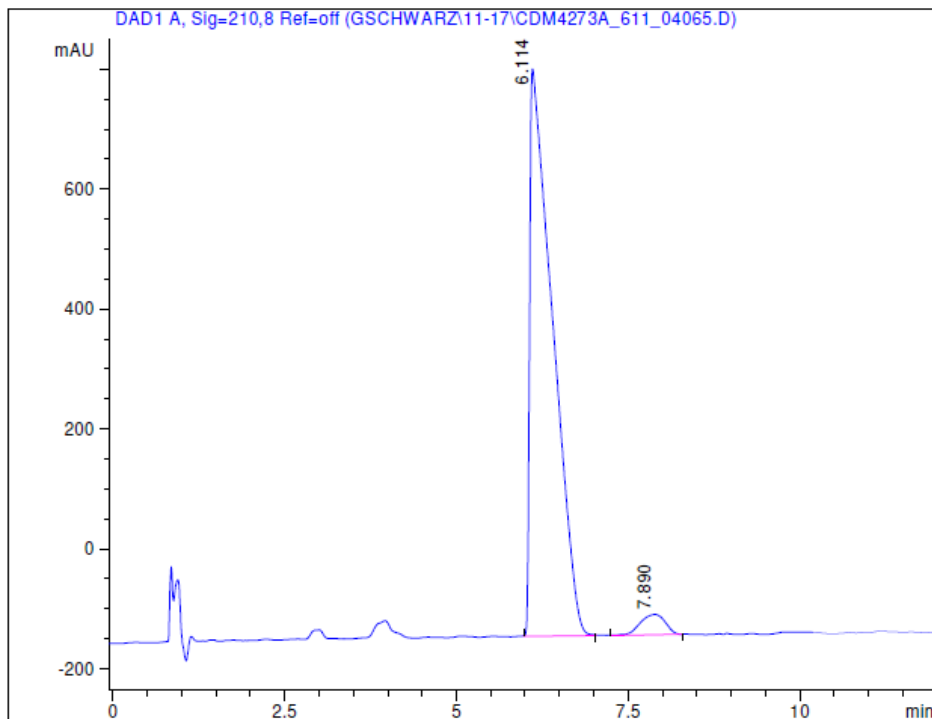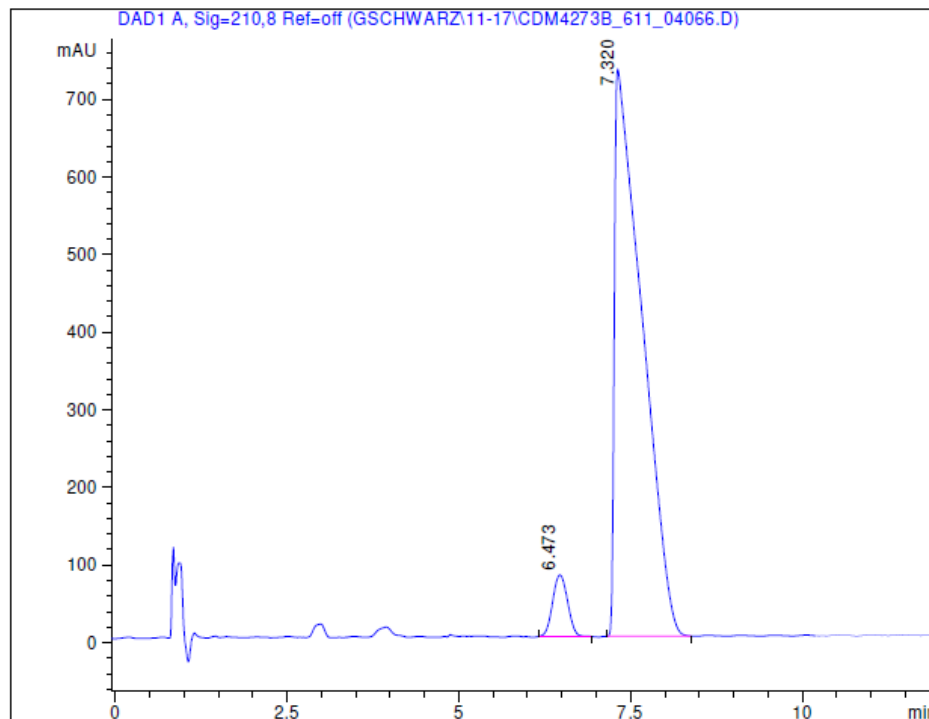

Signal 1:DAD1 A, Sig=210,8 Ref=off

| Peak # | RT [min] | Width [min] | Area  | Area % |
|--------|----------|-------------|-------|--------|
| 1      | 6.11     | 0.32        | 21721 | 96.20  |
| 2      | 7.89     | 0.42        | 857   | 3.80   |

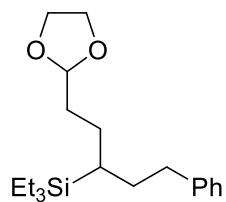

Signal 1:DAD1 A, Sig=210,8 Ref=off

| Peak # | RT [min] | Width [min] | Area  | Area % |
|--------|----------|-------------|-------|--------|
| 1      | 6.47     | 0.24        | 1202  | 5.60   |
| 2      | 7.32     | 0.39        | 20242 | 94.40  |

**Table 2, entry 13**  
**SFC: CHIRALCEL OJ column (1% 2-PrOH in supercritical CO<sub>2</sub>, 3.5 mL/min)**



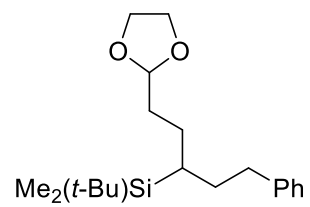

Table 2, entry 14  
(400 MHz, CDCl<sub>3</sub>)

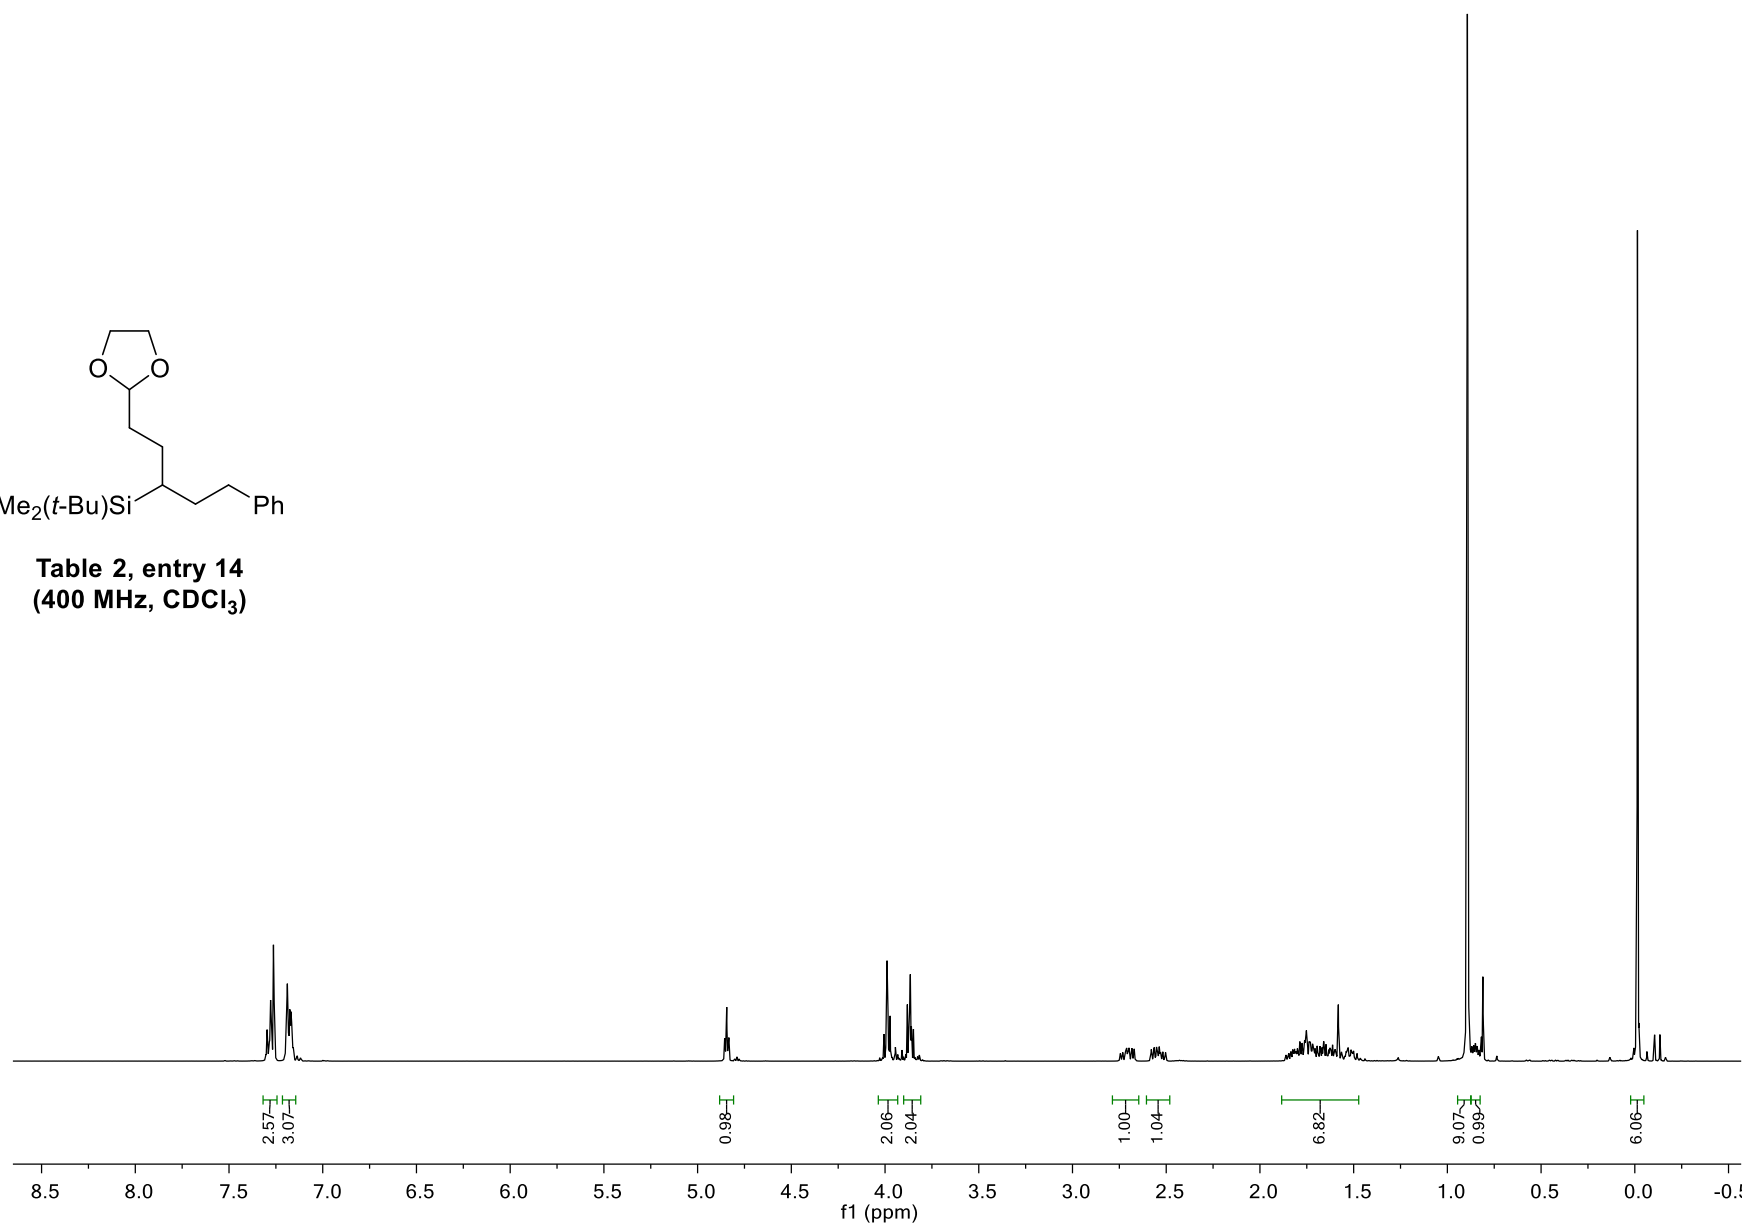

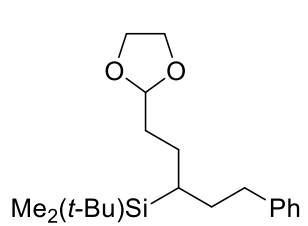

Table 2, entry 14  
(101 MHz, CDCl<sub>3</sub>)

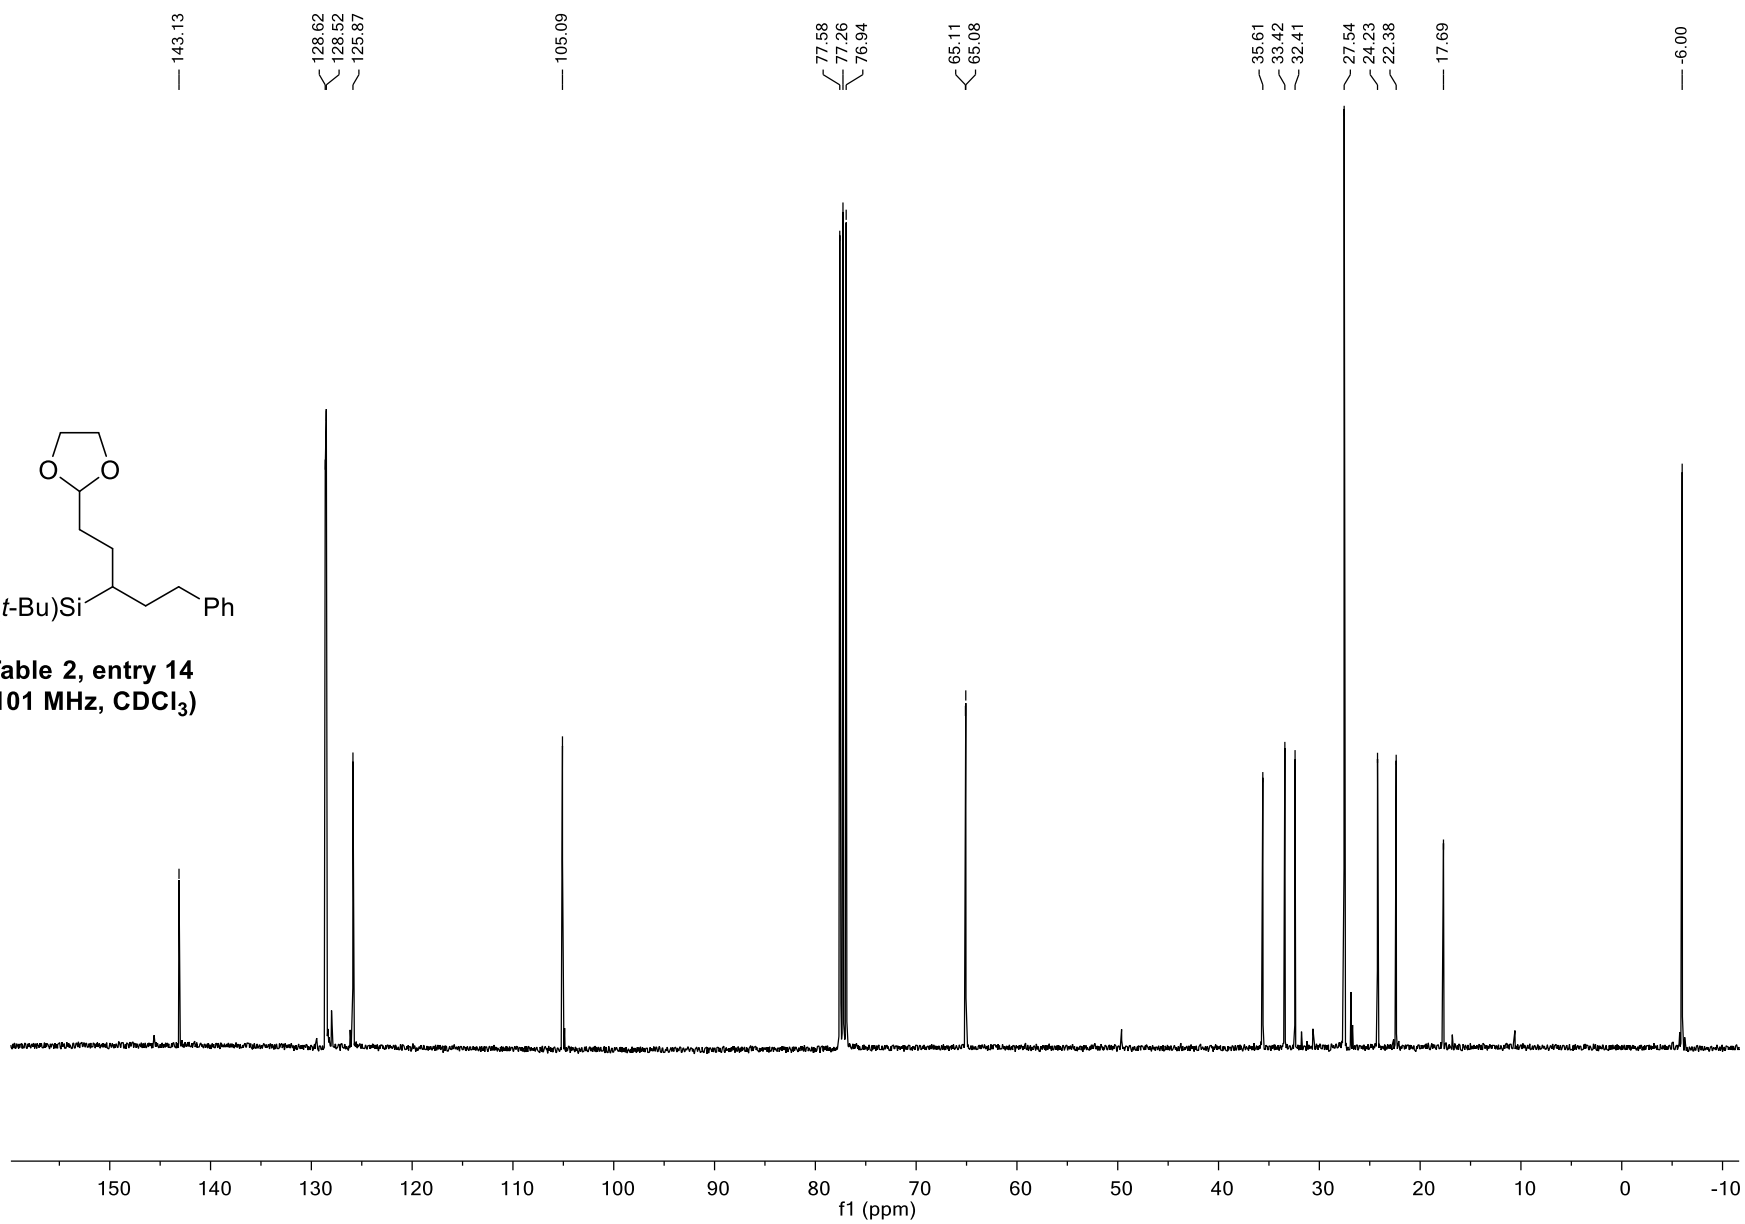

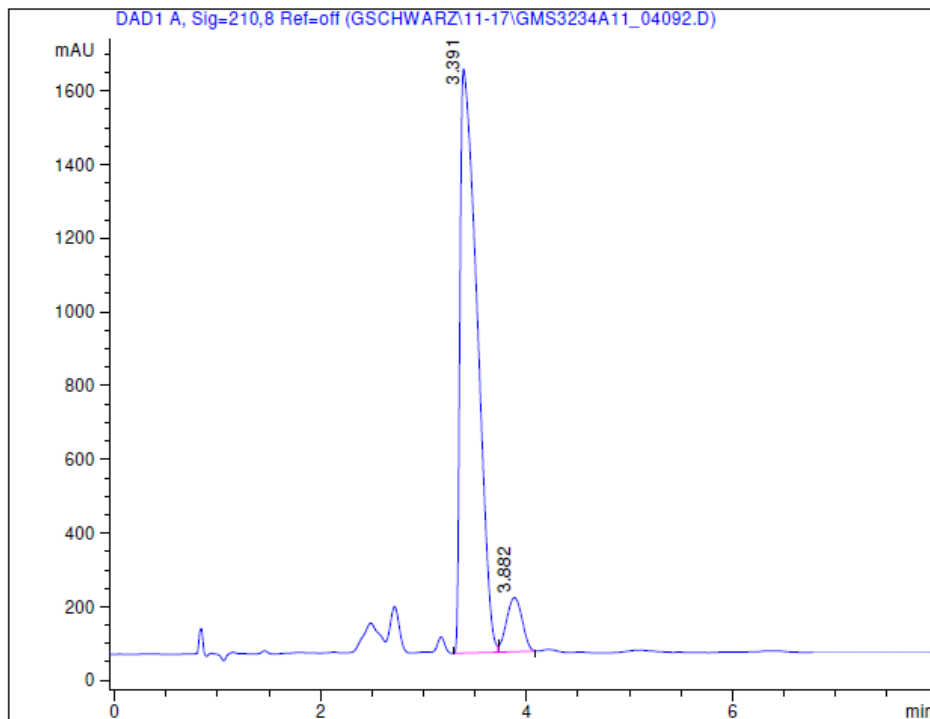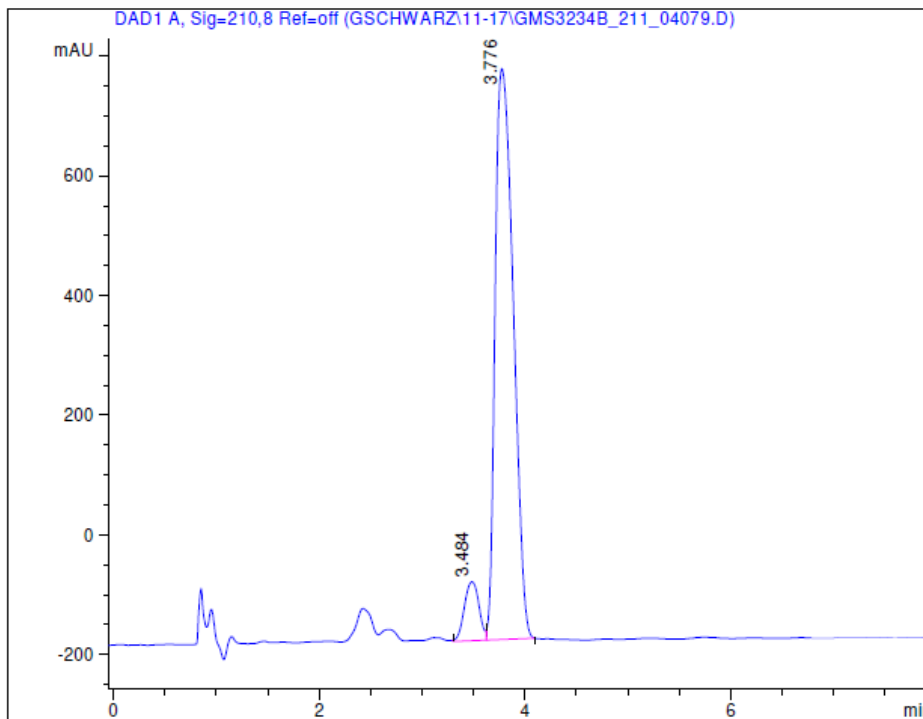

Signal 1:DAD1 A, Sig=210,8 Ref=off

| Peak # | RT [min] | Width [min] | Area  | Area % |
|--------|----------|-------------|-------|--------|
| 1      | 3.39     | 0.19        | 18101 | 92.11  |
| 2      | 3.88     | 0.18        | 1552  | 7.89   |

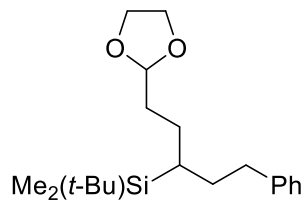

Signal 1:DAD1 A, Sig=210,8 Ref=off

| Peak # | RT [min] | Width [min] | Area  | Area % |
|--------|----------|-------------|-------|--------|
| 1      | 3.48     | 0.17        | 980   | 7.74   |
| 2      | 3.78     | 0.20        | 11678 | 92.26  |

**Table 2, entry 14**  
**SFC: CHIRALCEL OJ column (1% 2-PrOH in supercritical CO<sub>2</sub>, 3.5 mL/min)**

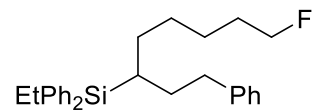

Table 3, entry 1  
(400 MHz, CDCl<sub>3</sub>)

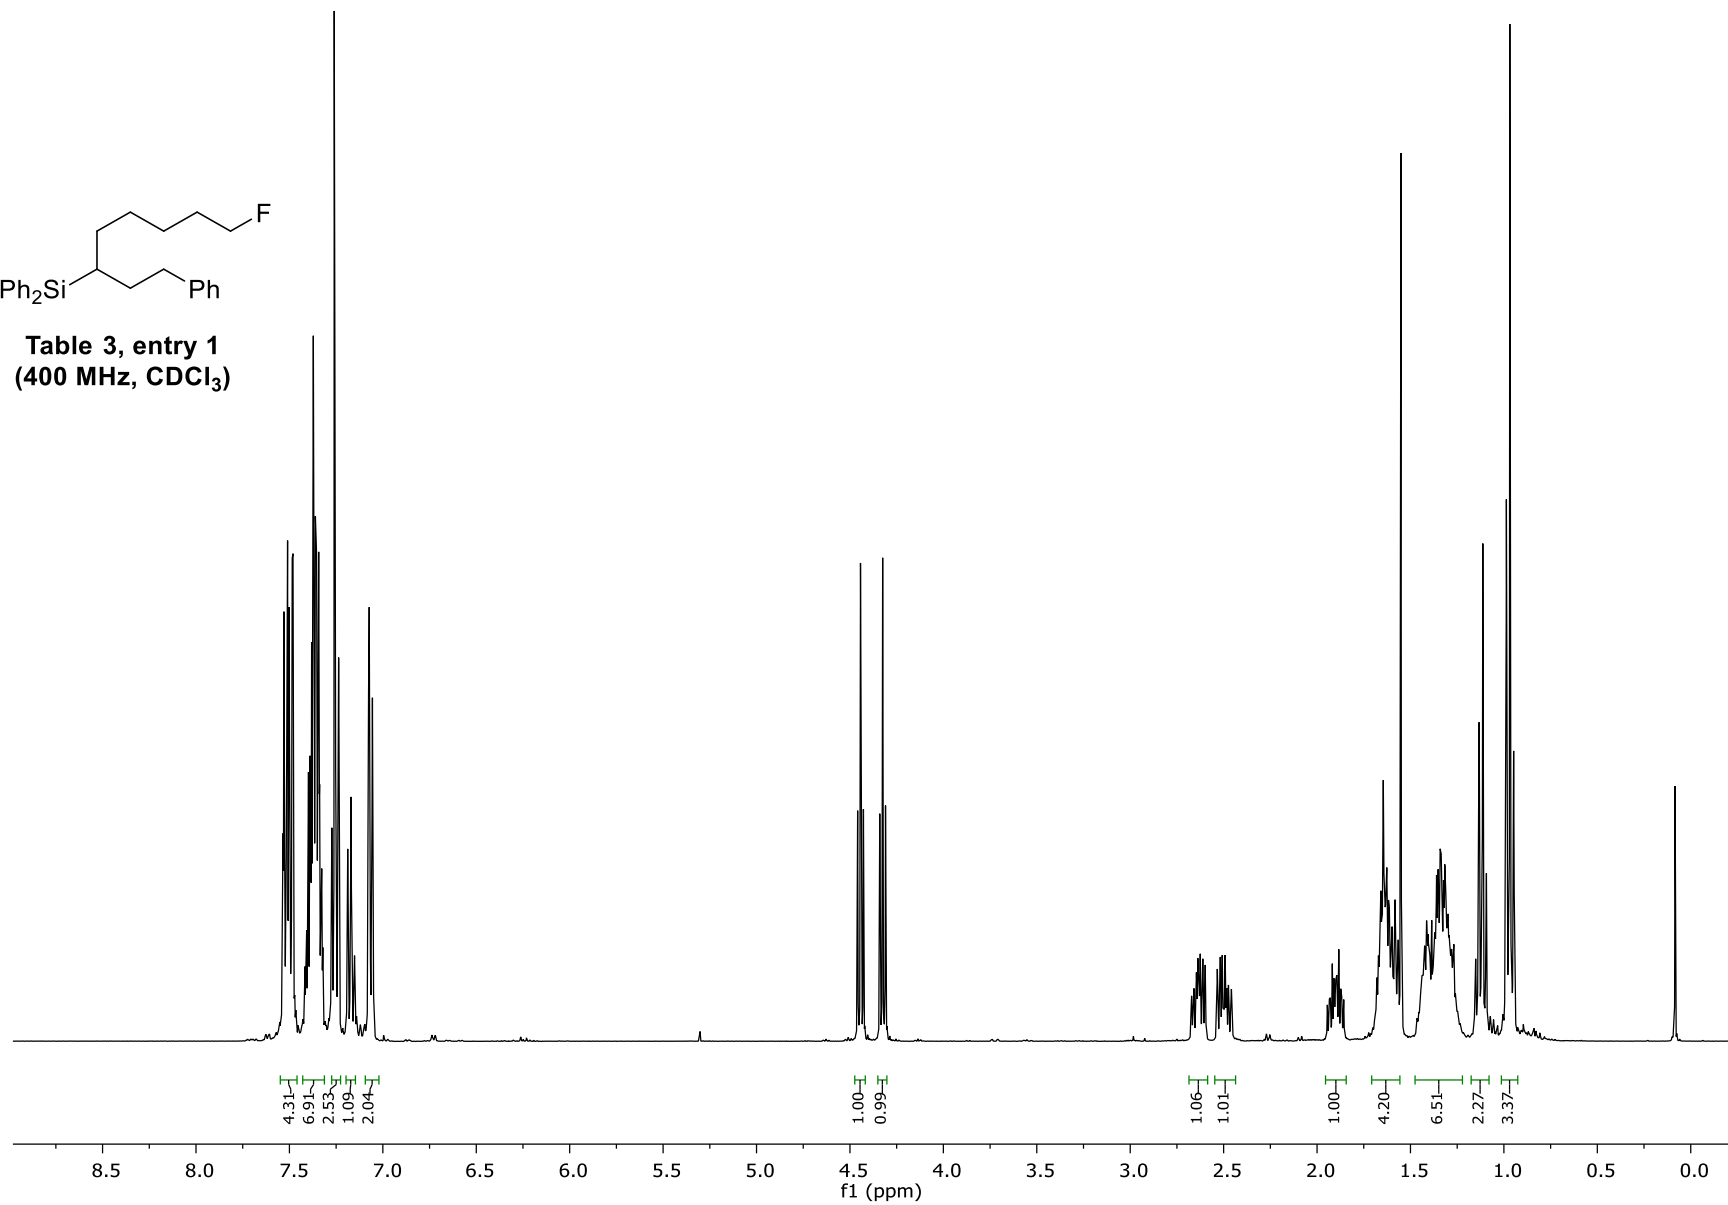

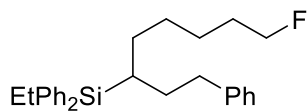

Table 3, entry 1  
(101 MHz, CDCl<sub>3</sub>)

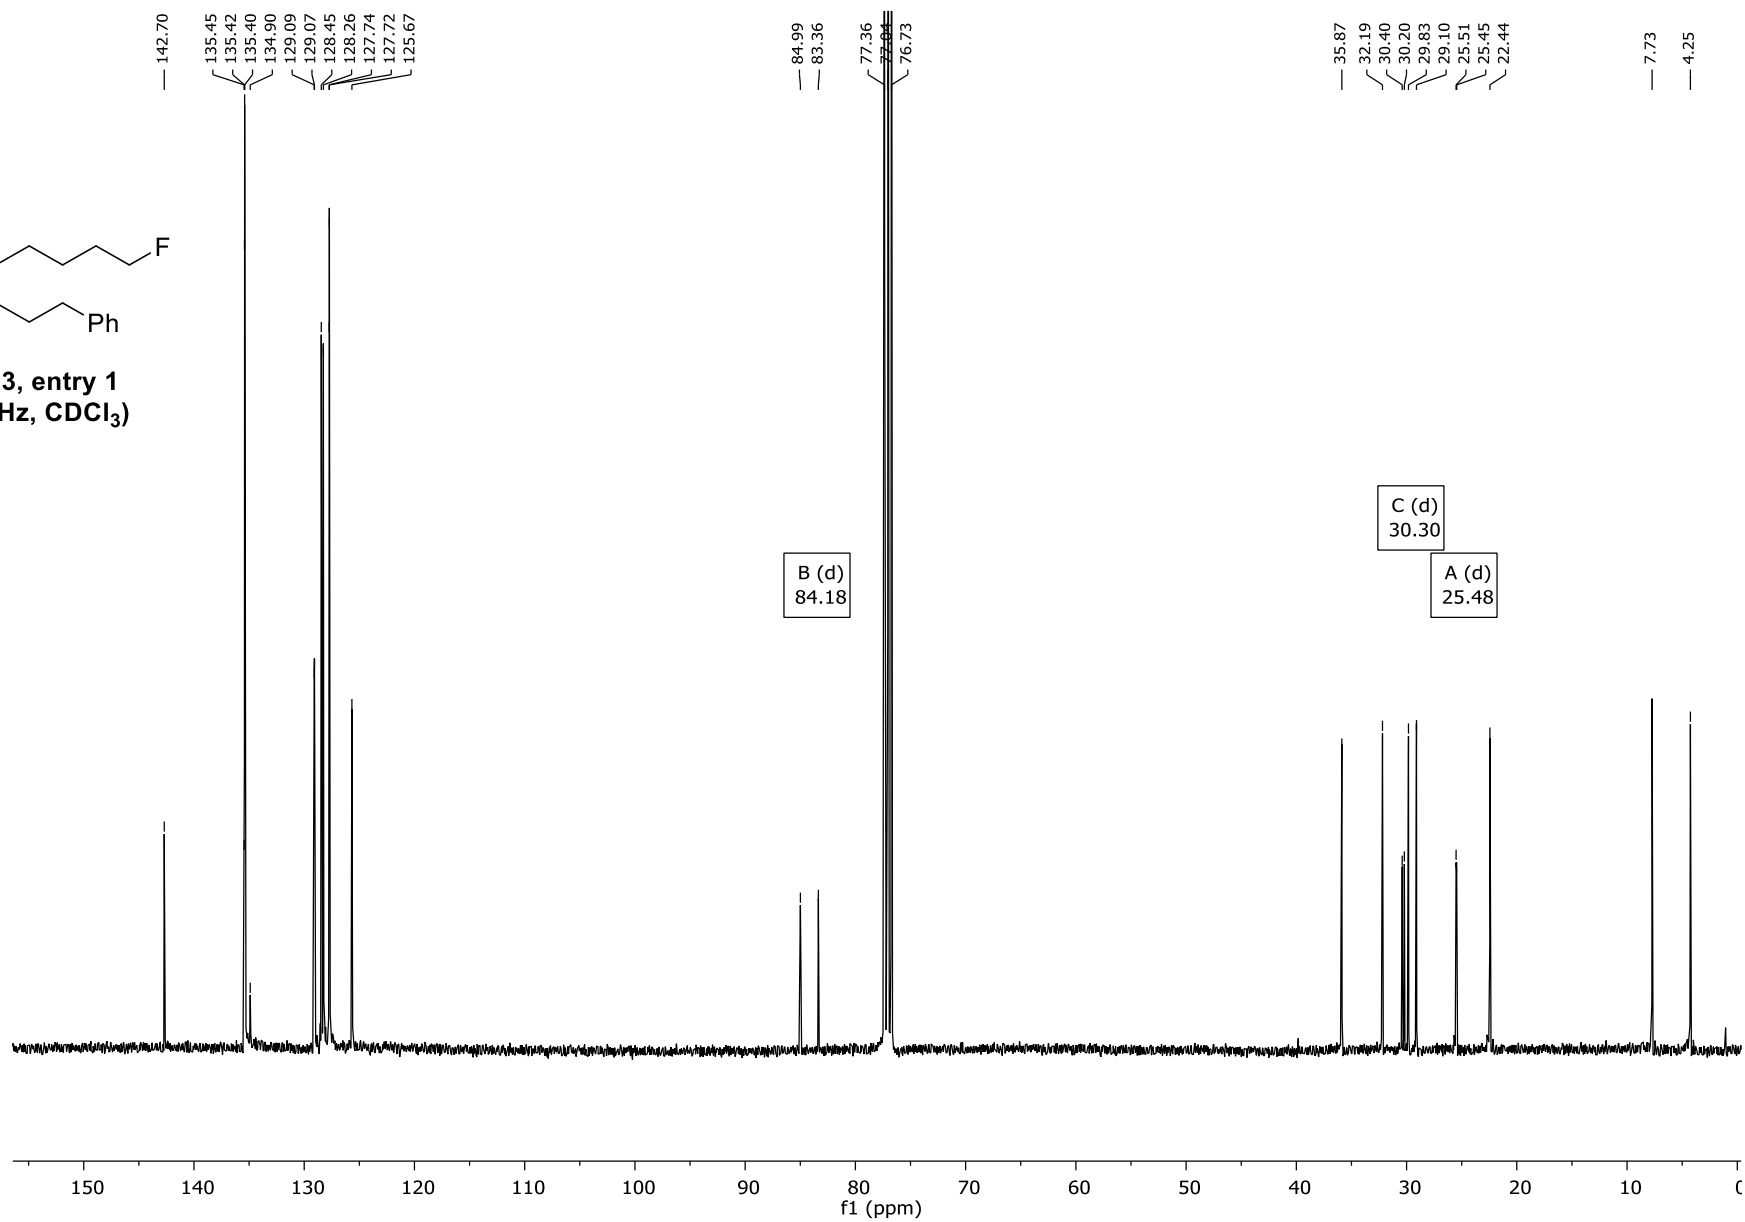

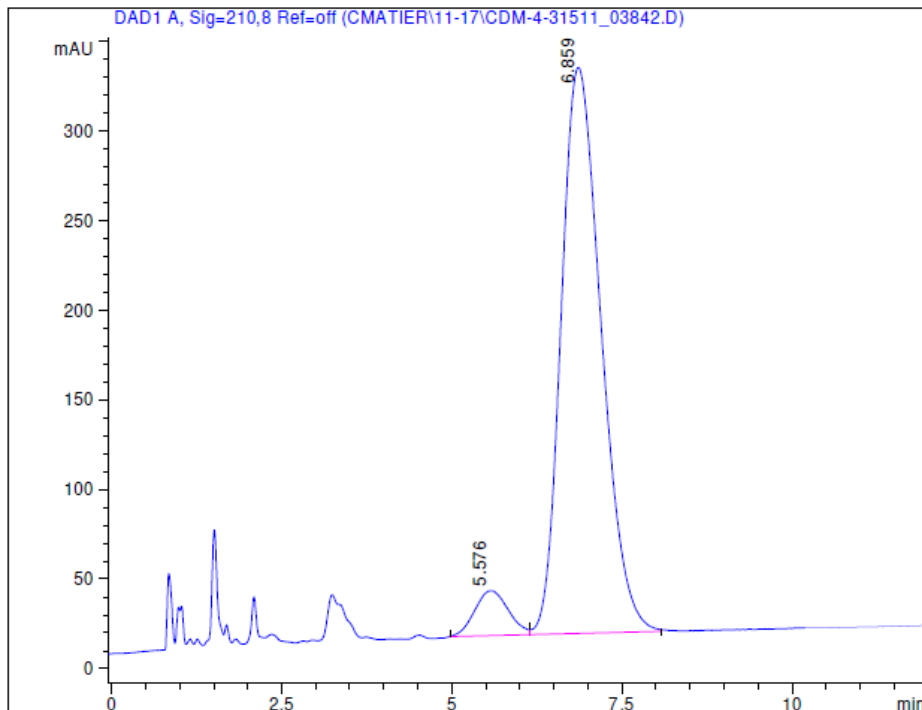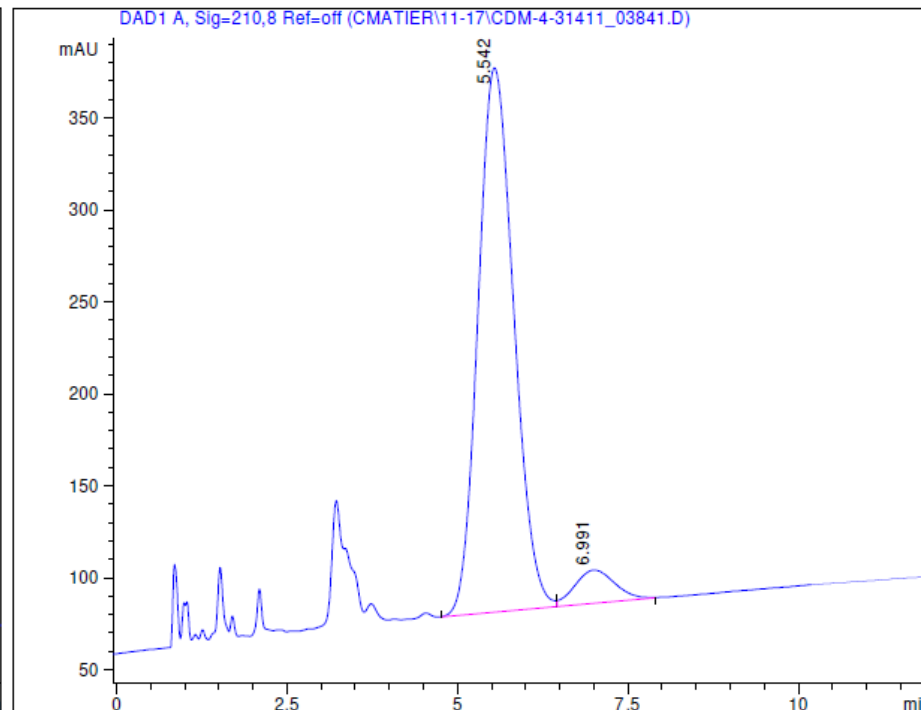

Signal 1:DAD1 A, Sig=210,8 Ref=off

| Peak # | RT [min] | Width [min] | Area  | Area % |
|--------|----------|-------------|-------|--------|
| 1      | 5.58     | 0.51        | 861   | 6.27   |
| 2      | 6.86     | 0.64        | 12878 | 93.73  |

Signal 1:DAD1 A, Sig=210,8 Ref=off

| Peak # | RT [min] | Width [min] | Area  | Area % |
|--------|----------|-------------|-------|--------|
| 1      | 5.54     | 0.61        | 10748 | 93.57  |
| 2      | 6.99     | 0.68        | 739   | 6.43   |

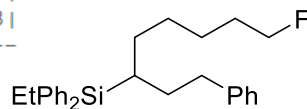

**Table 3, entry 1**

**SFC:** CHIRALCEL OJ column (20% 2-PrOH in supercritical CO<sub>2</sub>, 3.5 mL/min)

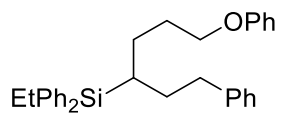

Table 3, entry 2  
(400 MHz, CDCl<sub>3</sub>)

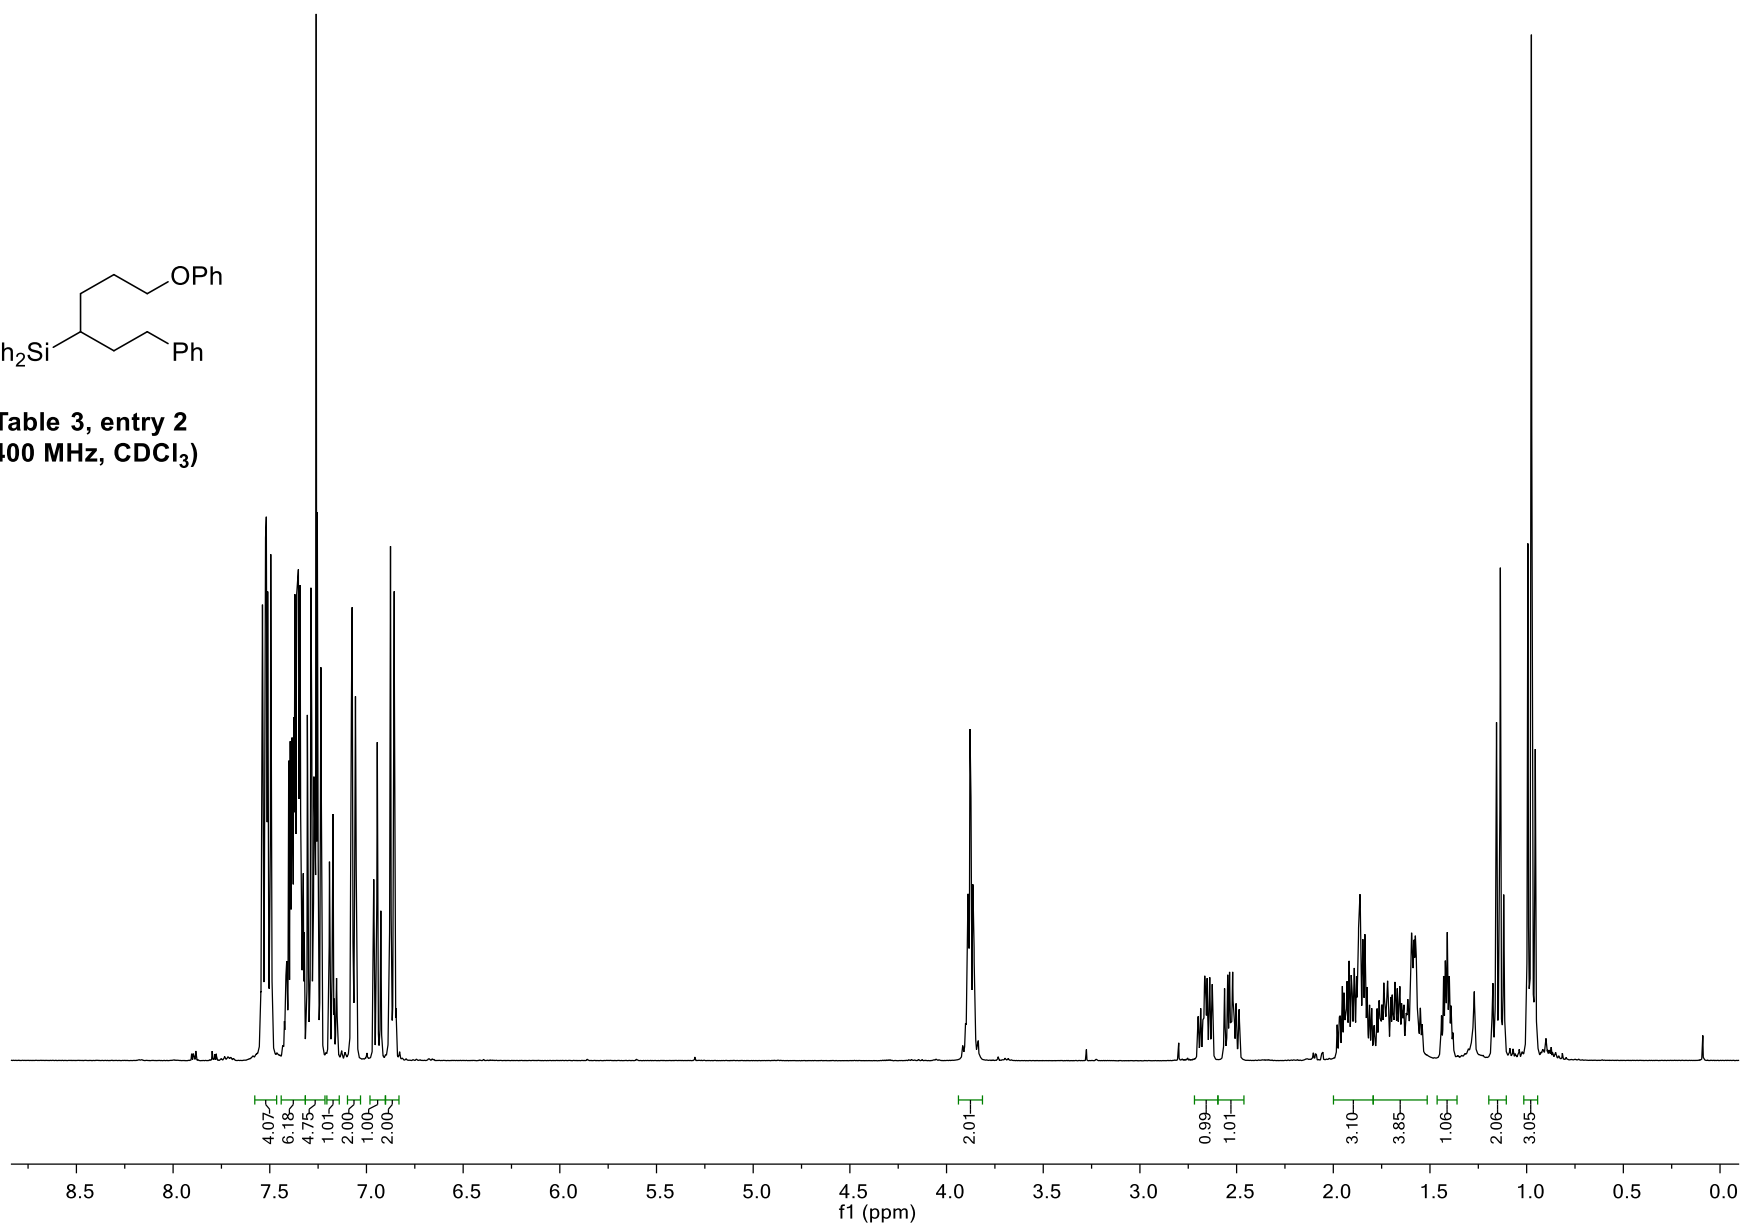

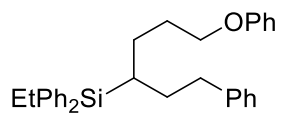

Table 3, entry 2  
(101 MHz, CDCl<sub>3</sub>)

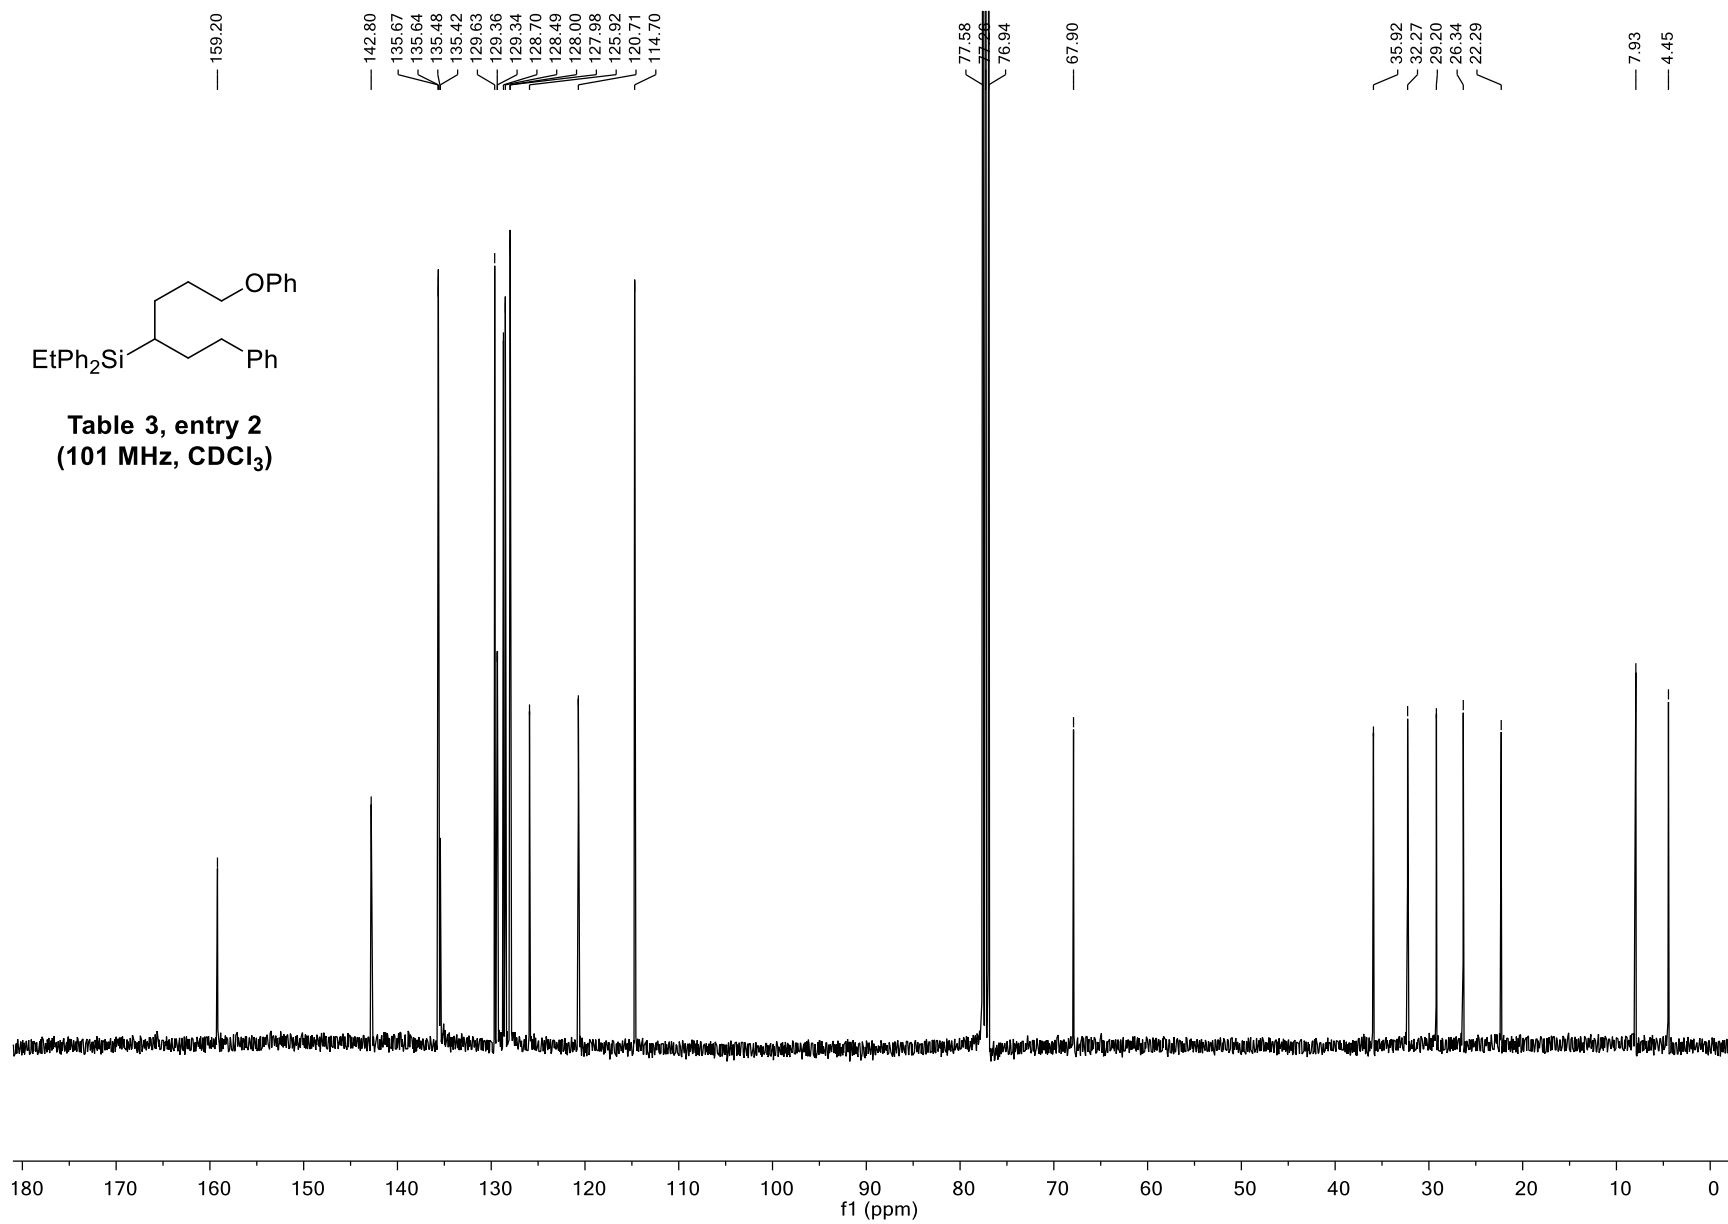



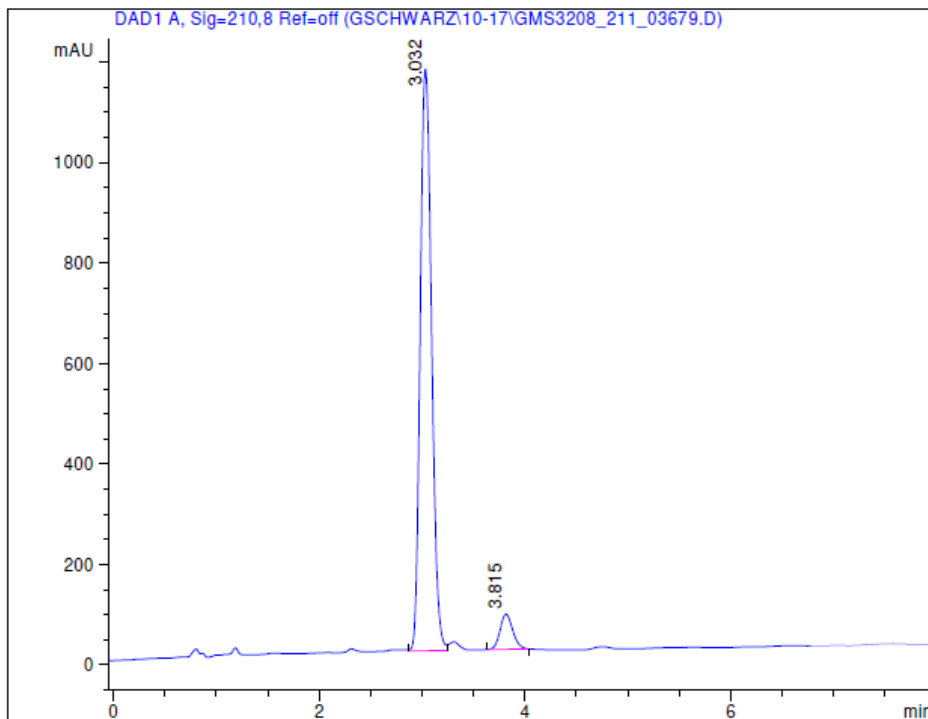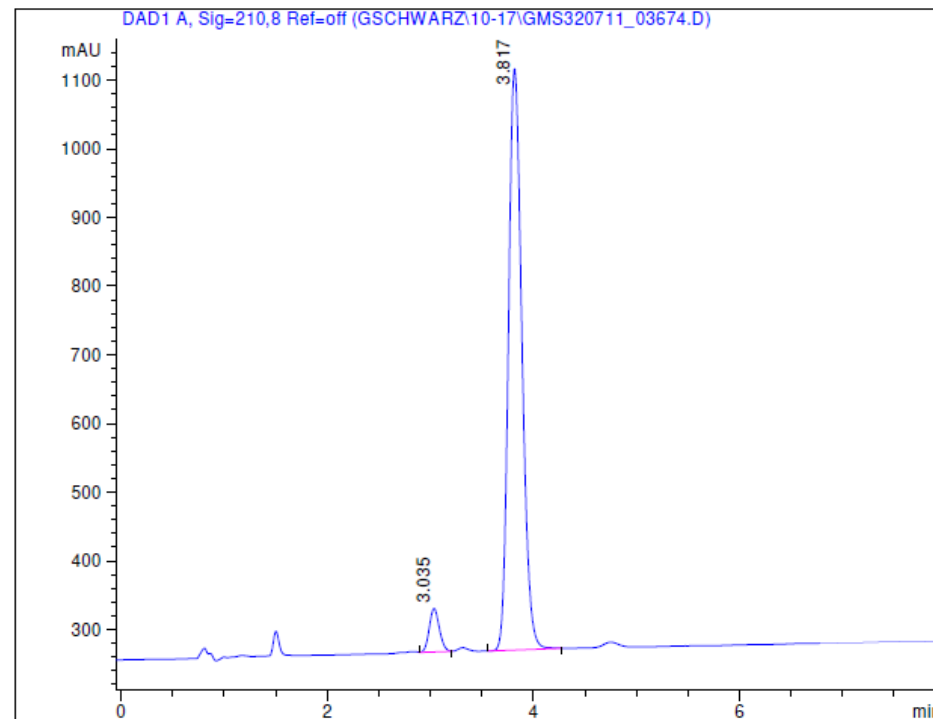

Signal 1:DAD1 A, Sig=210,8 Ref=off

| Peak # | RT [min] | Width [min] | Area | Area % |
|--------|----------|-------------|------|--------|
| 1      | 3.03     | 0.13        | 8826 | 93.68  |
| 2      | 3.81     | 0.14        | 596  | 6.32   |

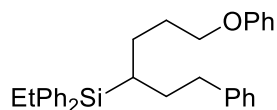

Signal 1:DAD1 A, Sig=210,8 Ref=off

| Peak # | RT [min] | Width [min] | Area | Area % |
|--------|----------|-------------|------|--------|
| 1      | 3.04     | 0.11        | 428  | 5.29   |
| 2      | 3.82     | 0.15        | 7669 | 94.71  |

**Table 3, entry 2**

**SFC:** CHIRALCEL OD-H column (30% 2-PrOH in supercritical CO<sub>2</sub>, 3.5 mL/min)

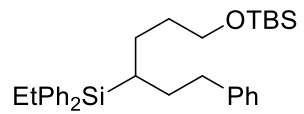

Table 3, entry 3  
(400 MHz, CDCl<sub>3</sub>)

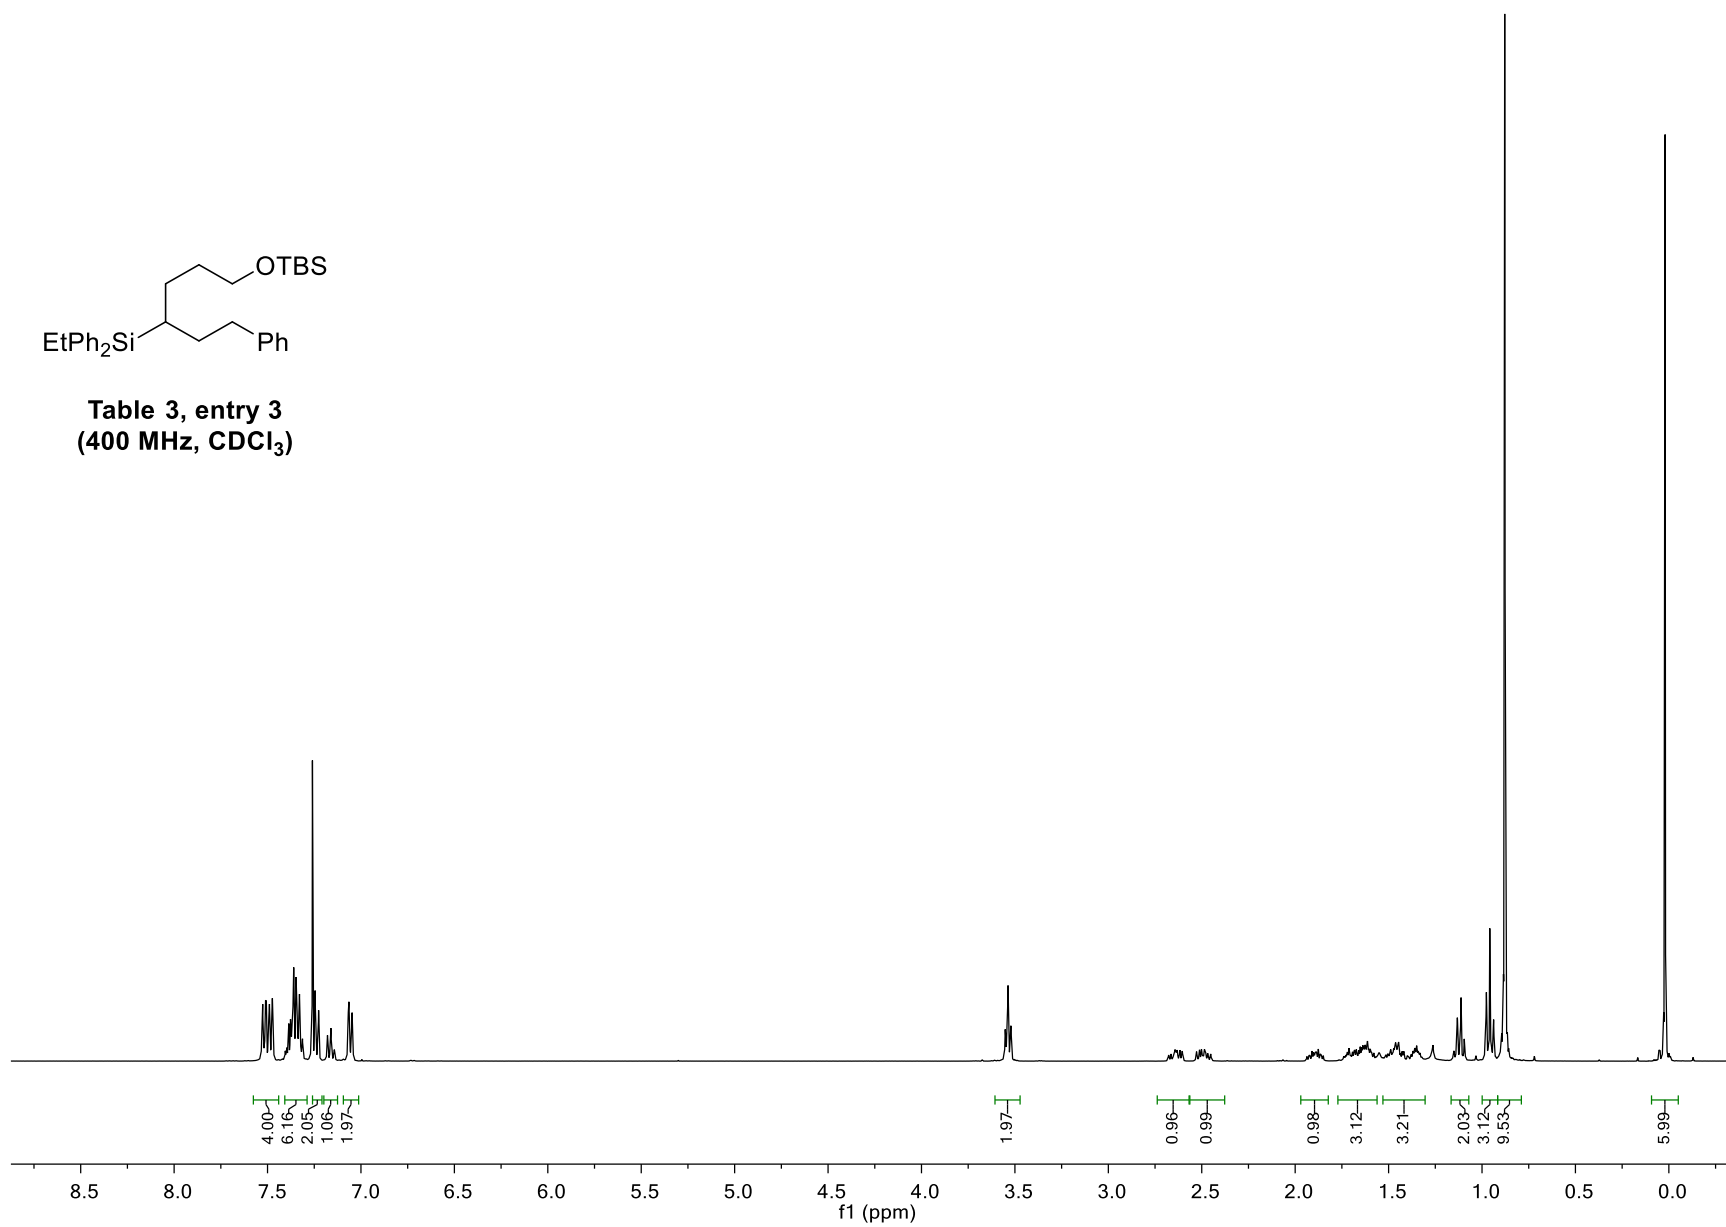



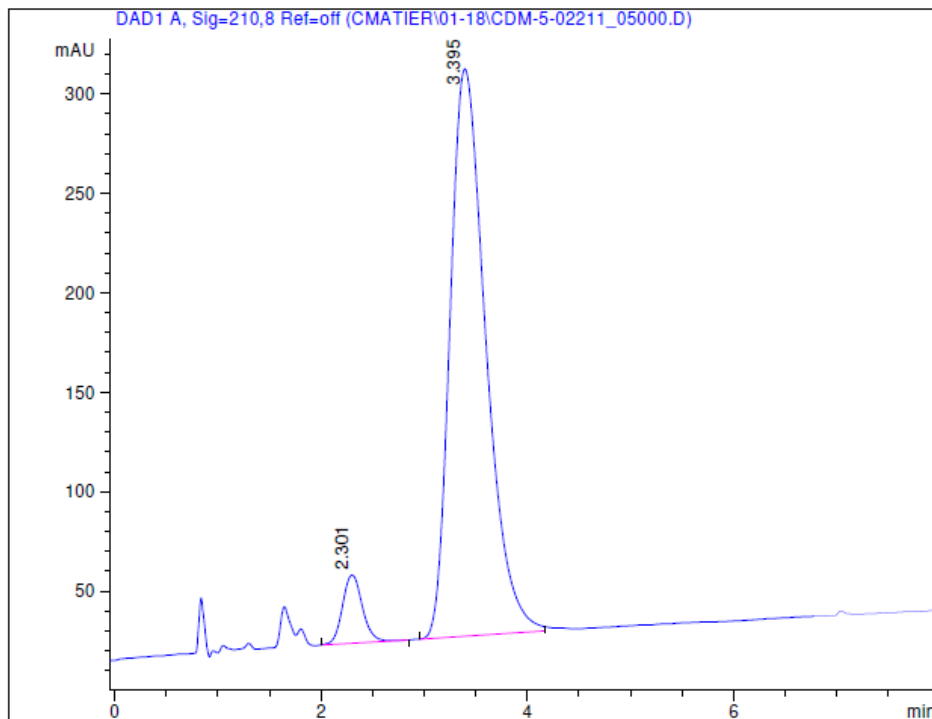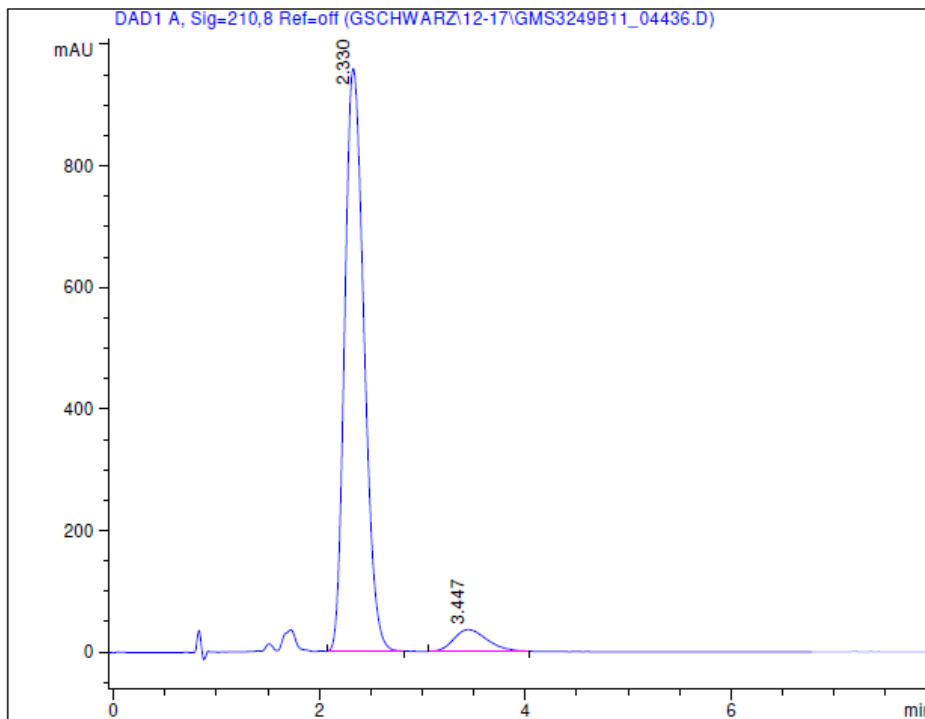

Signal 1:DAD1 A, Sig=210,8 Ref=off

| Peak # | RT [min] | Width [min] | Area | Area % |
|--------|----------|-------------|------|--------|
| 1      | 2.30     | 0.21        | 461  | 6.31   |
| 2      | 3.39     | 0.37        | 6845 | 93.69  |

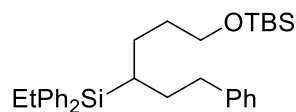

Signal 1:DAD1 A, Sig=210,8 Ref=off

| Peak # | RT [min] | Width [min] | Area  | Area % |
|--------|----------|-------------|-------|--------|
| 1      | 2.33     | 0.21        | 12526 | 94.00  |
| 2      | 3.45     | 0.37        | 800   | 6.00   |

**Table 3, entry 3**  
**SFC:** CHIRALCEL OJ column (10% 2-PrOH in supercritical CO<sub>2</sub>, 3.5 mL/min)

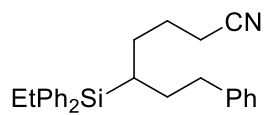

**Table 3, entry 4**  
**(400 MHz, CDCl<sub>3</sub>)**

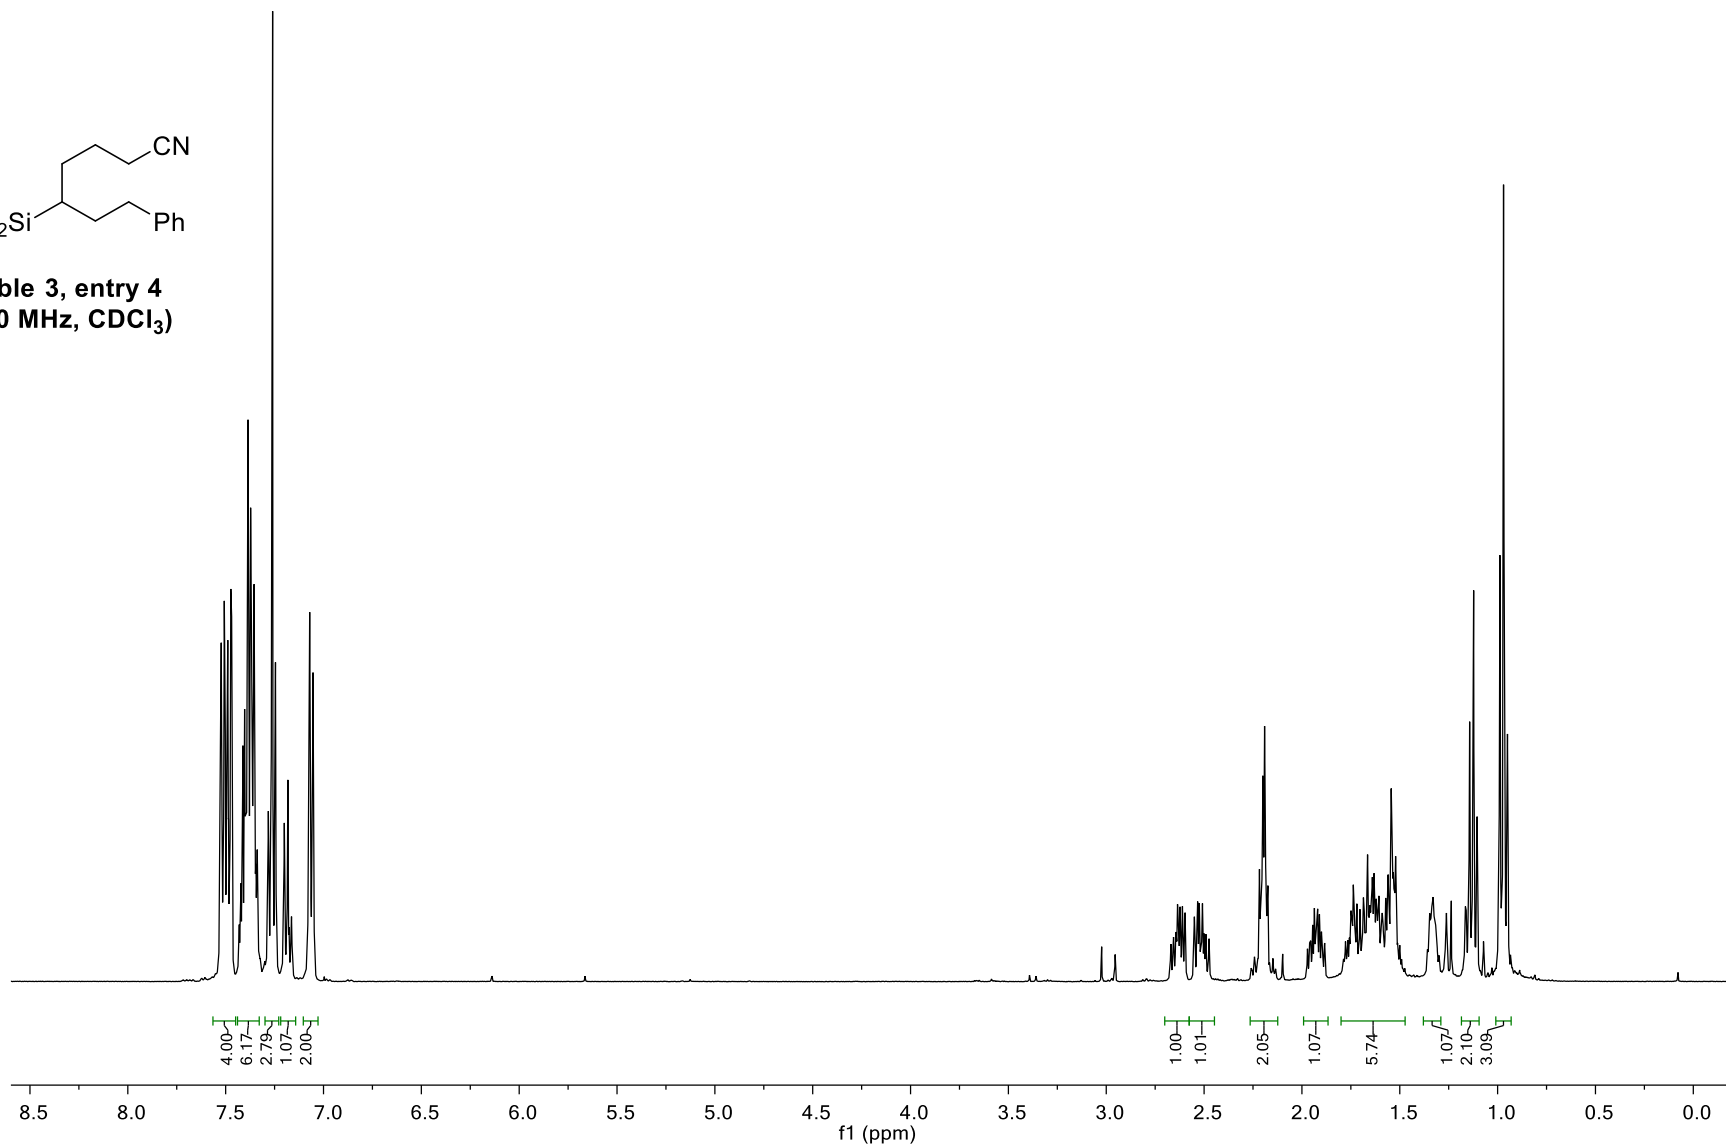

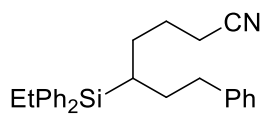

Table 3, entry 4  
(101 MHz, CDCl<sub>3</sub>)

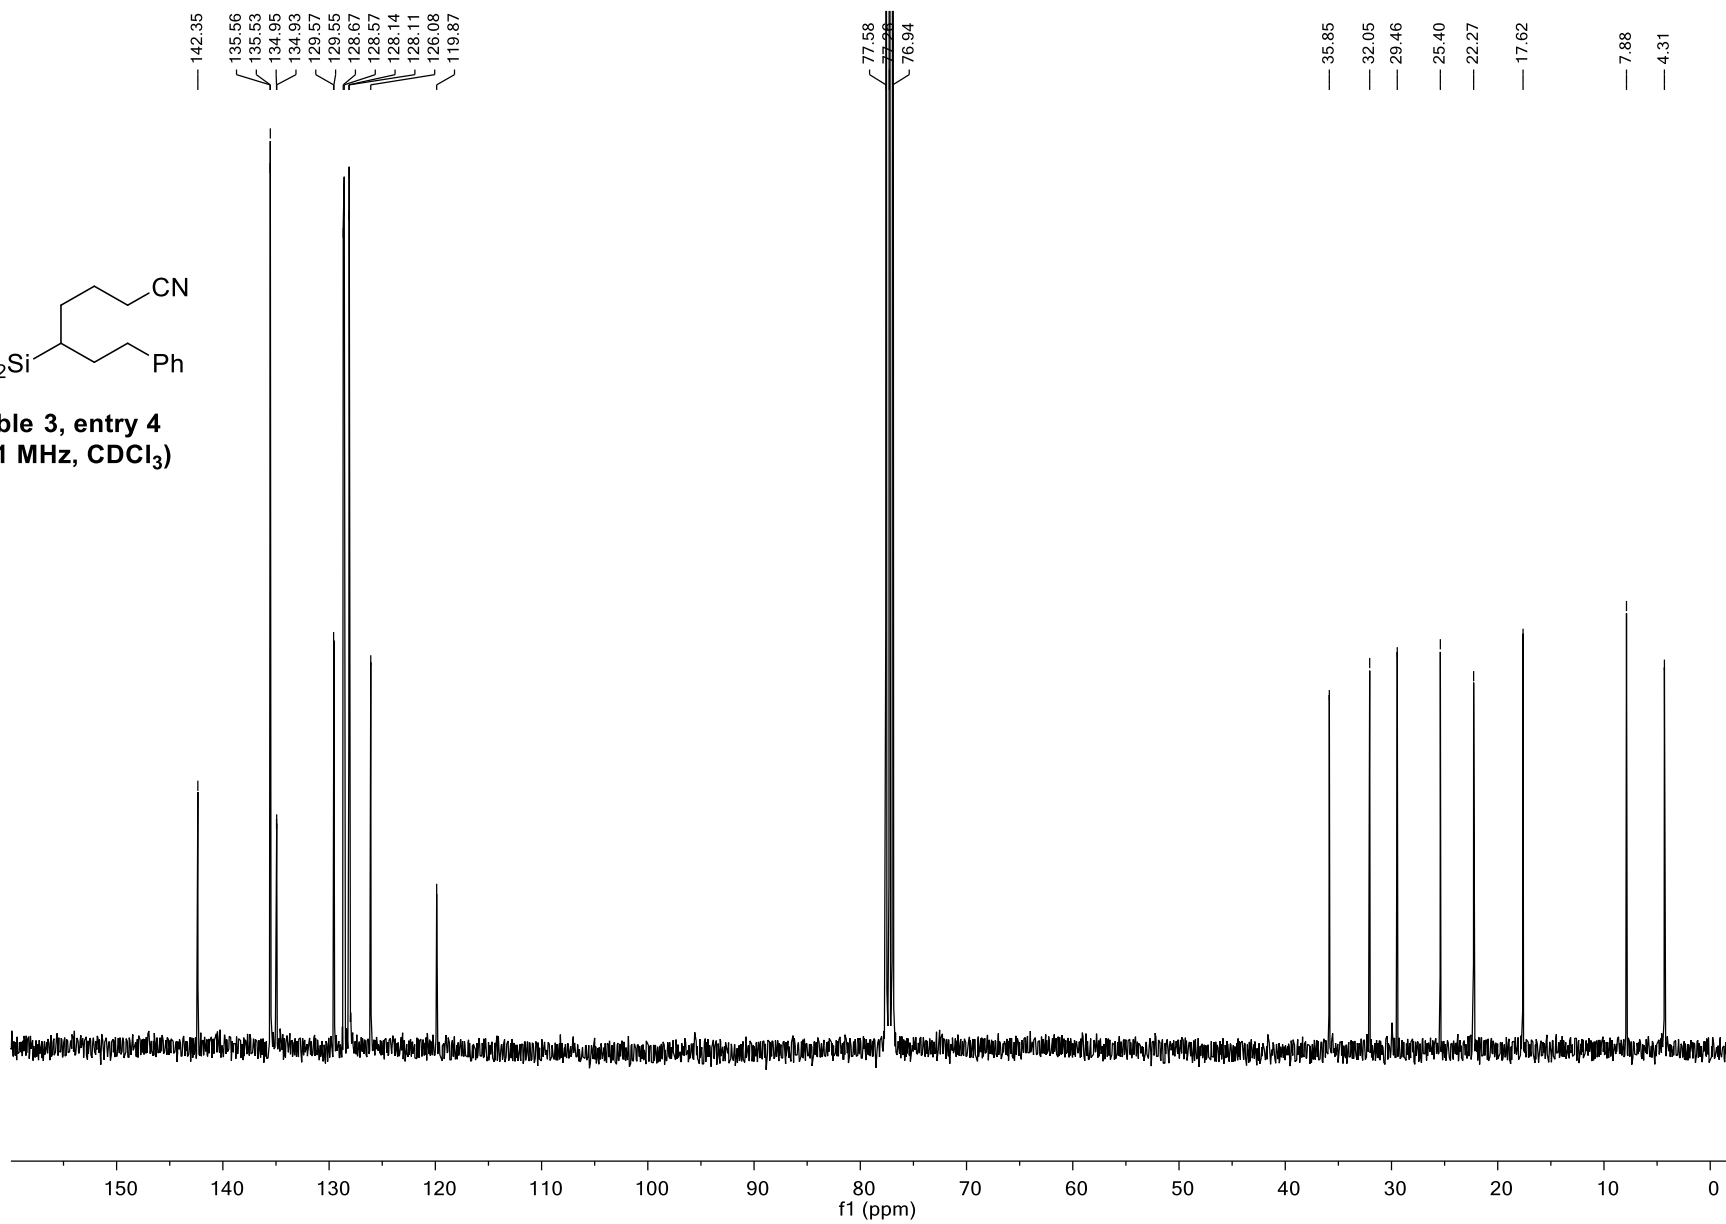

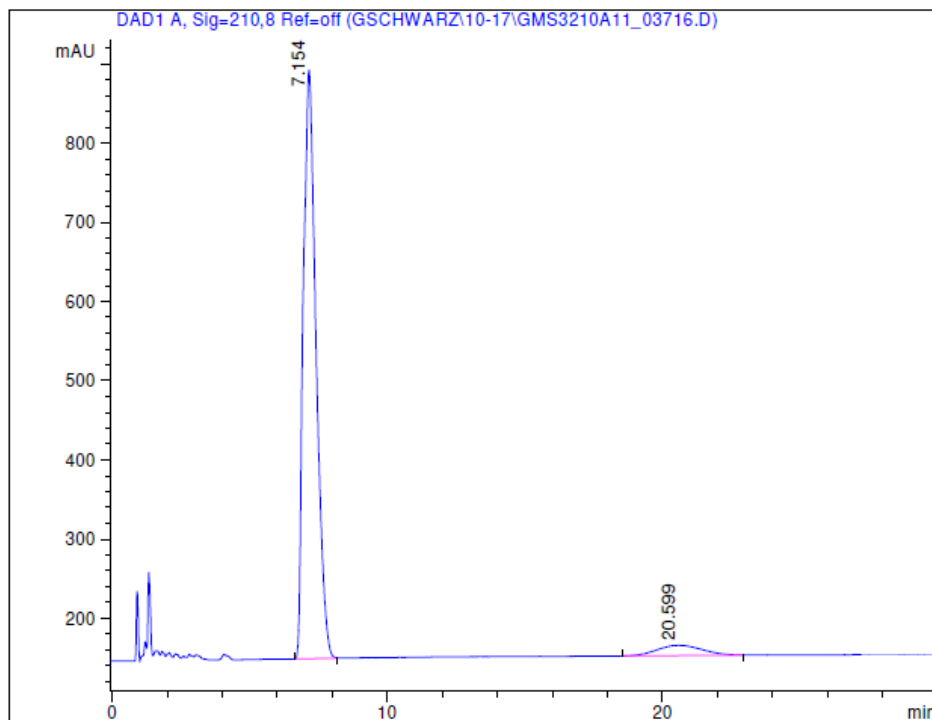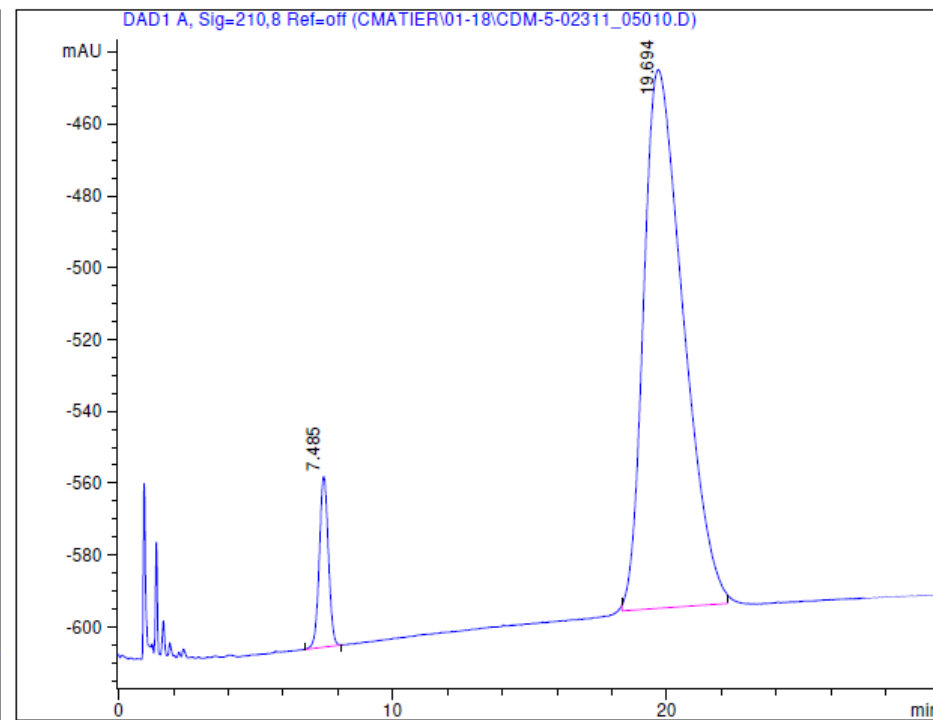

Signal 1:DAD1 A, Sig=210,8 Ref=off

| Peak # | RT [min] | Width [min] | Area  | Area % |
|--------|----------|-------------|-------|--------|
| 1      | 7.15     | 0.45        | 23814 | 94.12  |
| 2      | 20.60    | 1.89        | 1487  | 5.88   |

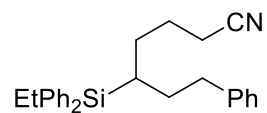

Signal 1:DAD1 A, Sig=210,8 Ref=off

| Peak # | RT [min] | Width [min] | Area  | Area % |
|--------|----------|-------------|-------|--------|
| 1      | 7.49     | 0.38        | 1095  | 6.79   |
| 2      | 19.69    | 1.49        | 15032 | 93.21  |

**Table 3, entry 4**

SFC: CHIRALCEL OJ column (45% MeOH in supercritical CO<sub>2</sub>, 3.5 mL/min)





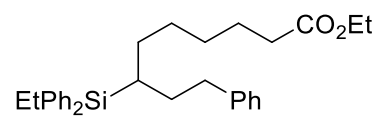

Table 3, entry 5  
(101 MHz, CDCl<sub>3</sub>)

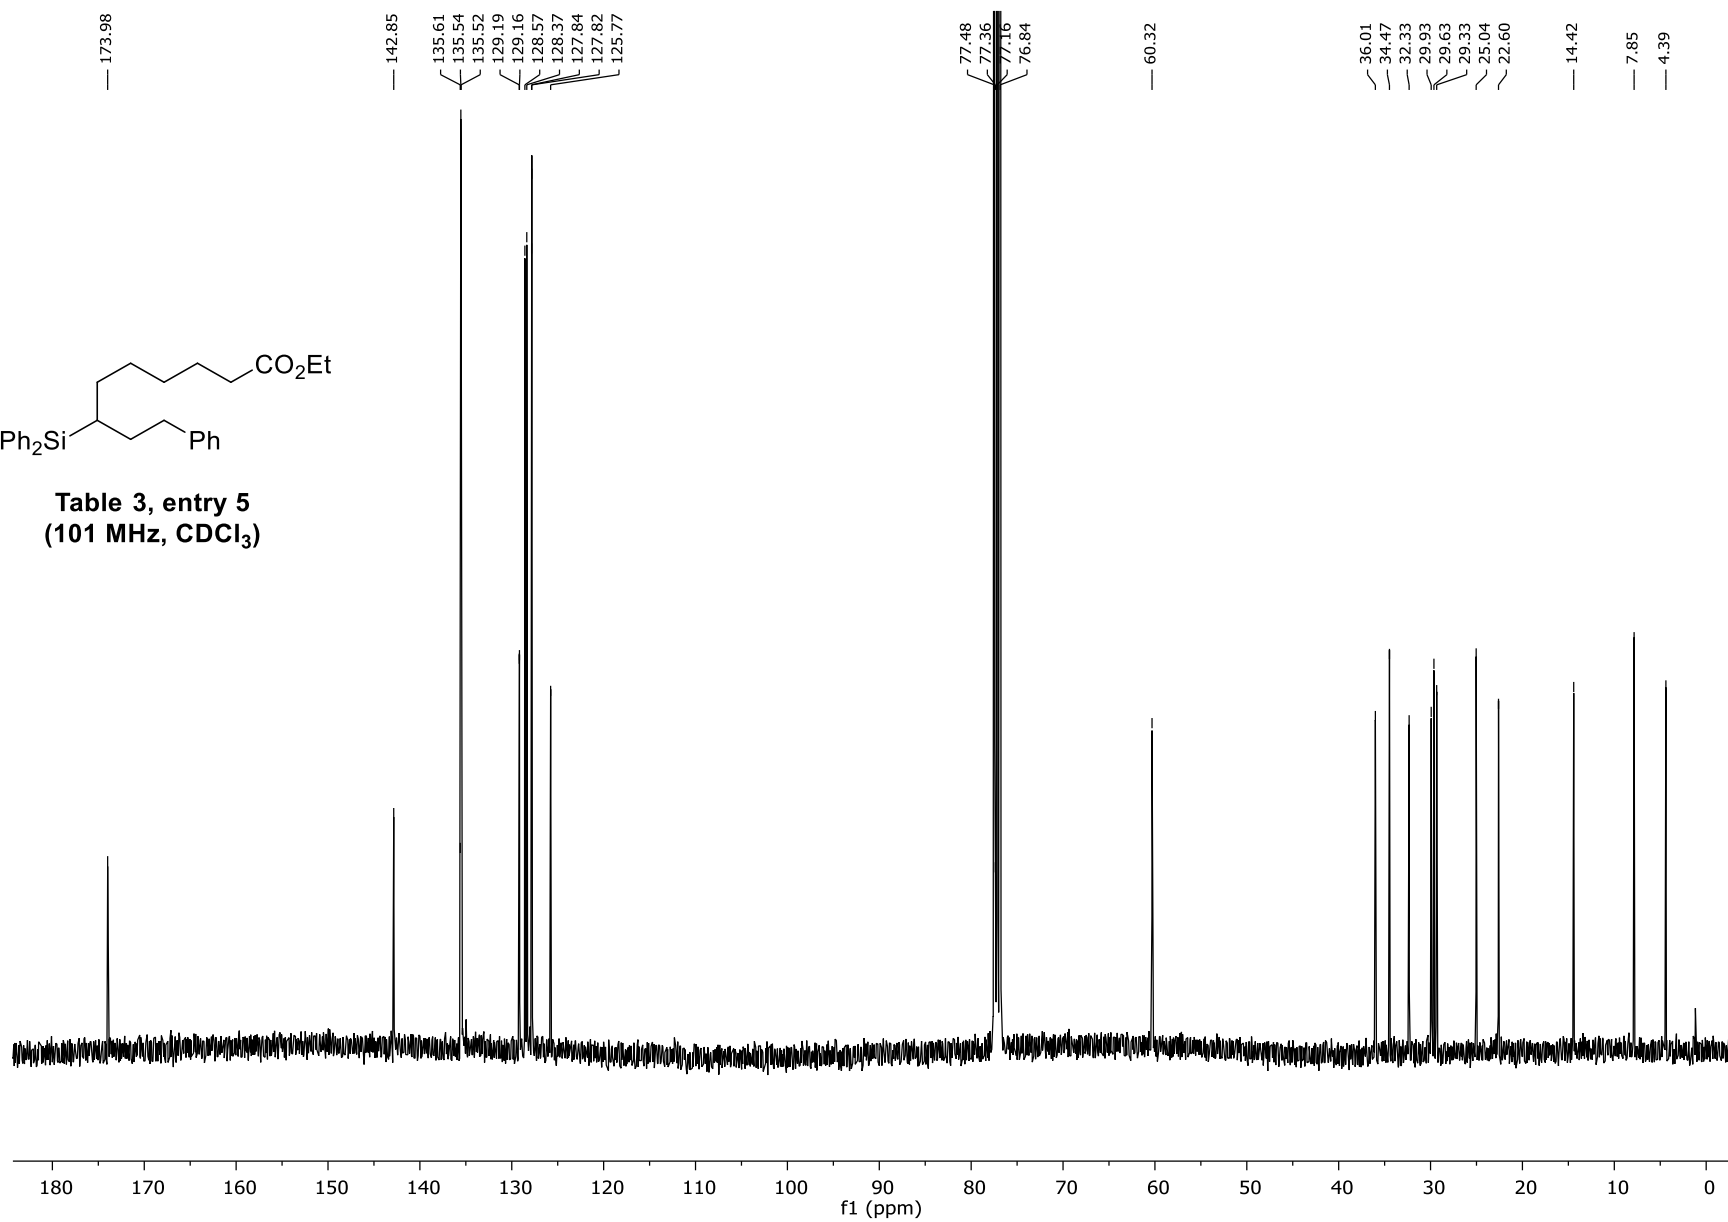



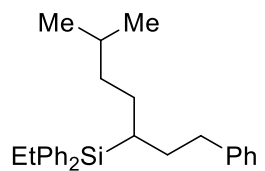

Table 3, entry 6  
(400 MHz, CDCl<sub>3</sub>)

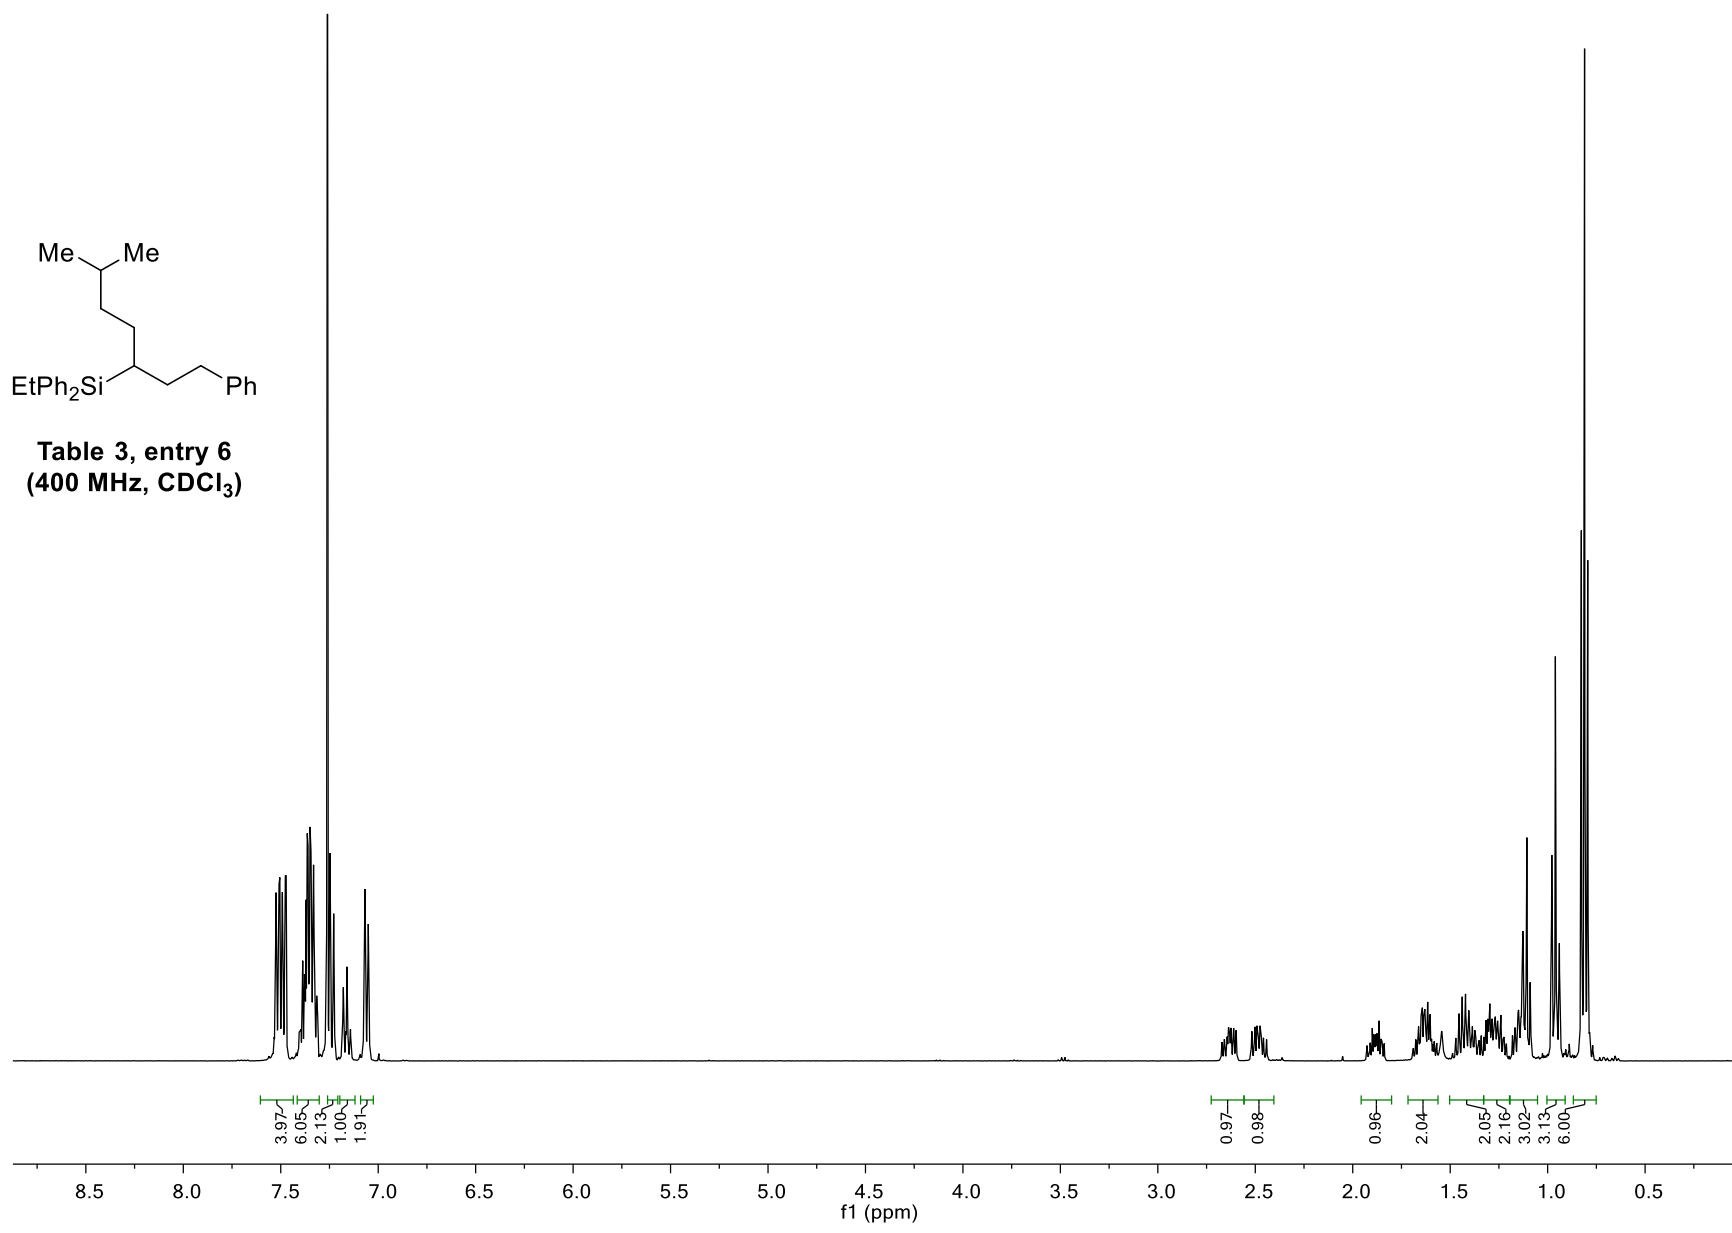

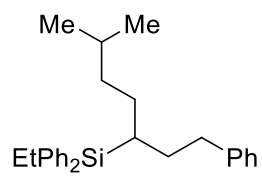

Table 3, entry 6  
(101 MHz, CDCl<sub>3</sub>)

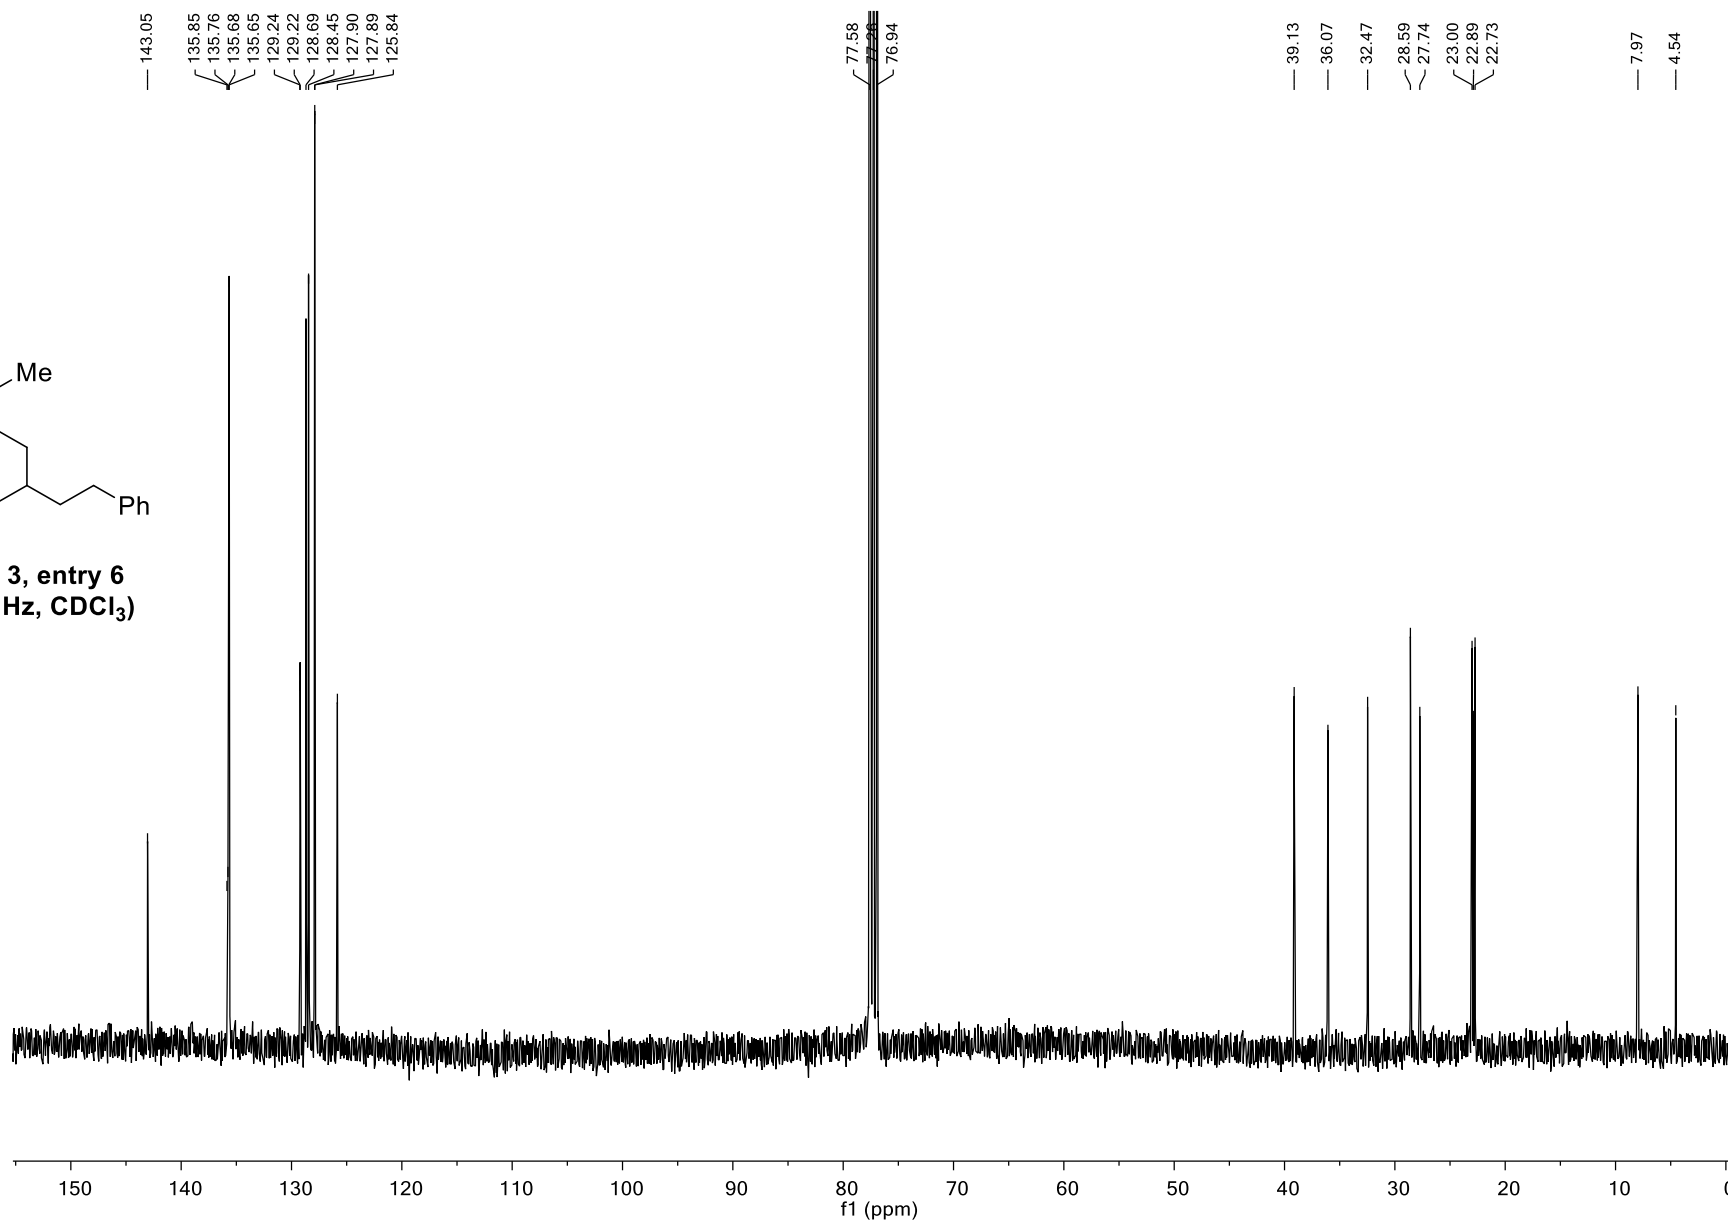

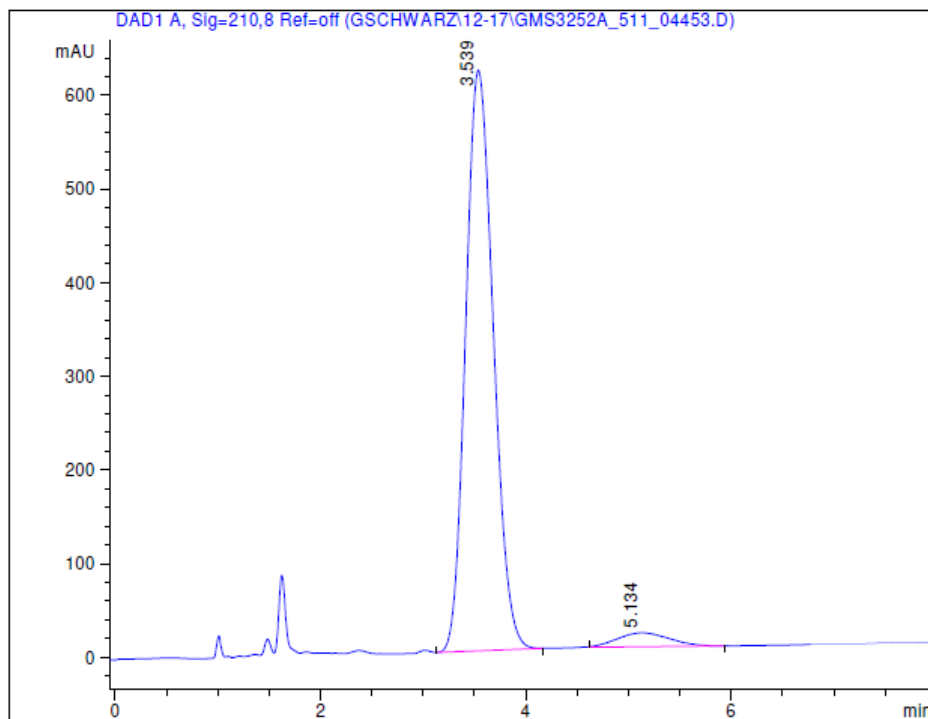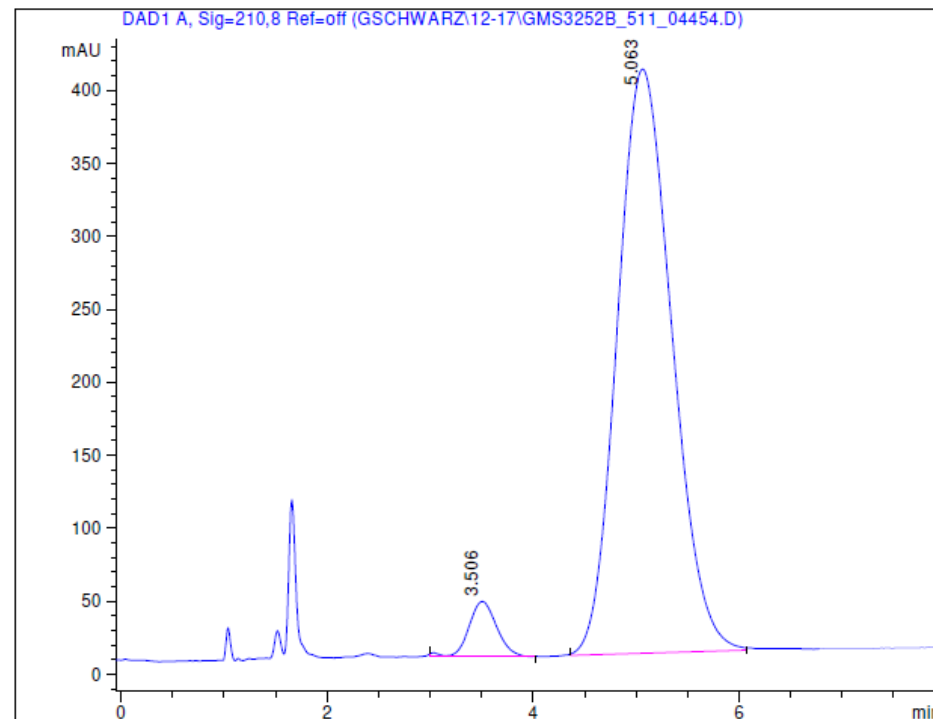

Signal 1:DAD1 A, Sig=210,8 Ref=off

| Peak # | RT [min] | Width [min] | Area  | Area % |
|--------|----------|-------------|-------|--------|
| 1      | 3.54     | 0.29        | 11596 | 95.72  |
| 2      | 5.13     | 0.51        | 519   | 4.28   |

Signal 1:DAD1 A, Sig=210,8 Ref=off

| Peak # | RT [min] | Width [min] | Area  | Area % |
|--------|----------|-------------|-------|--------|
| 1      | 3.51     | 0.29        | 699   | 4.54   |
| 2      | 5.06     | 0.58        | 14721 | 95.46  |

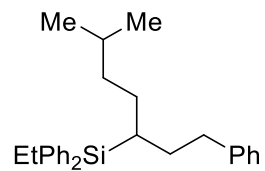

**Table 3, entry 6**

**SFC:** CHIRALCEL OJ column (15% 2-PrOH in supercritical CO<sub>2</sub>, 3.5 mL/min)
